# Supplementary material for: In vitro transfection efficiencies of T-shaped spermine-based cationic lipids with identical and nonidentical tails under high serum conditions
Source: Royal Society of Chemistry journal article supplement (doi:10.1039/d2ob02129c), 2023-01-01
Supplement: d2ob02129c1.pdf [file d2ob02129c1.pdf]

## Supporting Information

### Compound 8

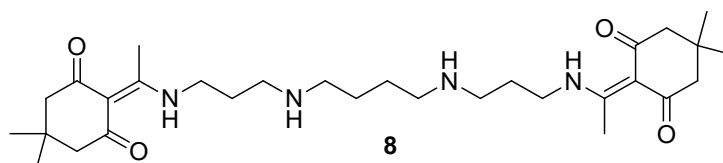

Yield: 80%; IR:  $\nu_{\text{max}}$ ,  $\text{cm}^{-1}$ : 3438, 2924, 2854, 1636, 1572, 1461, 1369, 1335, 1305, 1141, 1096, 1032, 890, 723;  $^1\text{H}$  NMR (400 MHz,  $\text{CDCl}_3$ ):  $\delta$  1.00 (s, 12H,  $2 \times \text{C}(\text{CH}_3)_2$ ), 1.51 (m, 4H,  $\text{NHCH}_2\text{CH}_2\text{CH}_2\text{CH}_2\text{NH}$ ), 1.83 (quint,  $J = 6.9$  Hz, 4H,  $2 \times \text{DdeNHCH}_2\text{CH}_2\text{CH}_2\text{NH}$ ), 2.33 (s, 8H,  $4 \times \text{COCH}_2$ ), 2.53 (s, 6H,  $2 \times \text{CH}_3\text{C}=\text{C}$ ), 2.60 (t,  $J = 5.9$  Hz, 4H,  $2 \times \text{NHCH}_2\text{CH}_2\text{CH}_2\text{CH}_2\text{NH}$ ), 2.71 (t,  $J = 6.9$  Hz, 4H,  $2 \times \text{NHCH}_2\text{CH}_2\text{CH}_2\text{NHDde}$ ), 3.46 (m, 4H,  $2 \times \text{DdeNHCH}_2\text{CH}_2\text{CH}_2\text{NH}$ ), 13.41 (br, s, 2H,  $2 \times \text{NHDde}$ );  $^{13}\text{C}$  NMR (100 MHz,  $\text{CDCl}_3$ ):  $\delta$  27.6, 29.3, 41.3, 46.6, 49.6, 17.9, 28.2, 30.1, 52.8, 107.8, 173.6, 197.4; HRMS (ESI-TOF),  $m/z$  calcd for  $\text{C}_{52}\text{H}_{94}\text{N}_5\text{O}_5$   $[\text{M}+\text{H}]^+$  531.3905; found 531.3913.

### Compound 10 (C10,C10)

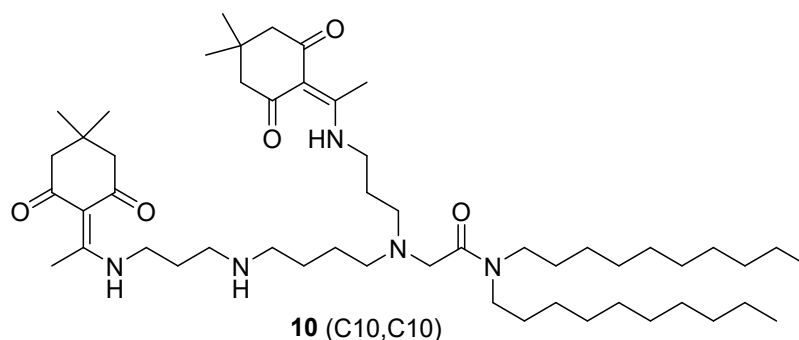

Yield: 80%; IR:  $\nu_{\text{max}}$ ,  $\text{cm}^{-1}$ : 3438, 2924, 2854, 1636, 1572, 1461, 1369, 1335, 1305, 1141, 1096, 1032, 890, 723;  $^1\text{H}$  NMR (400 MHz,  $\text{CDCl}_3$ ):  $\delta$  0.85 (t,  $J = 6.7$  Hz, 6H,  $2 \times \text{CH}_3$ ), 1.00 (s, 12H,  $2 \times \text{C}(\text{CH}_3)_2$ ), 1.23 (s, 28H,  $2 \times (\text{CH}_2)_7$ ), 1.46 (m, 2H,  $\text{CONCH}_2\text{CH}_2$ ), 1.50 (m, 2H,  $\text{CONCH}_2\text{CH}_2$ ), 1.64 (br s, 2H,  $\text{NHCH}_2\text{CH}_2\text{CH}_2\text{CH}_2\text{N}$ ), 1.89 (m, 2H,  $\text{NCH}_2\text{CH}_2\text{CH}_2\text{NHDde}$ ), 2.13 (br s, 2H,  $\text{NHCH}_2\text{CH}_2\text{CH}_2\text{CH}_2\text{N}$ ), 2.32 (s, 10H,  $4 \times \text{COCH}_2$ ,  $\text{DdeNHCH}_2\text{CH}_2\text{CH}_2\text{NH}$ ), 2.53 and 2.55 (s, 6H,  $2 \times \text{CH}_3\text{C}=\text{C}$ ), 2.68 (m, 2H,  $\text{NHCH}_2\text{CH}_2\text{CH}_2\text{CH}_2\text{N}$ ), 2.85 (m, 2H,  $\text{NCH}_2\text{CH}_2\text{CH}_2\text{NHDde}$ ), 2.96 (t,  $J = 5.1$  Hz, 2H,  $\text{NHCH}_2\text{CH}_2\text{CH}_2\text{CH}_2\text{N}$ ), 3.10 (t,  $J = 7.4$  Hz, 2H,  $\text{DdeNHCH}_2\text{CH}_2\text{CH}_2\text{NH}$ ), 3.16 (t,  $J = 7.5$  Hz, 2H,  $\text{NCH}_2\text{CH}_2$ ), 3.26 (m, 2H,  $\text{NCH}_2\text{CH}_2$ ), 3.30 (s, 2H,  $\text{NCH}_2\text{CO}$ ), 3.44 (q,  $J = 5.3$  Hz, 2H,  $\text{NCH}_2\text{CH}_2\text{CH}_2\text{NHDde}$ ), 3.56 (q,  $J = 5.5$  Hz,

2H, DdeNHCH<sub>2</sub>CH<sub>2</sub>CH<sub>2</sub>NH), 13.45 (br s, 1H, NHDde), 13.50 (br s, 1H, NHDde); <sup>13</sup>C NMR (100 MHz, CDCl<sub>3</sub>): δ 14.1, 18.0, 18.1, 22.6, 25.4, 25.8, 26.9, 27.1, 27.7, 28.2, 29.3, 29.4, 29.5, 30.0, 31.8, 41.2, 41.5, 46.4, 46.6, 47.5, 48.5, 52.8, 53.6, 55.3, 55.9, 107.9, 108.1, 170.0, 173.8, 174.0, 197.8; HRMS (ESI-TOF), *m/z* calcd for C<sub>52</sub>H<sub>94</sub>N<sub>5</sub>O<sub>5</sub> [M+H]<sup>+</sup> 868.7249; found 868.7258.

### Compound 10 (C12,C12)

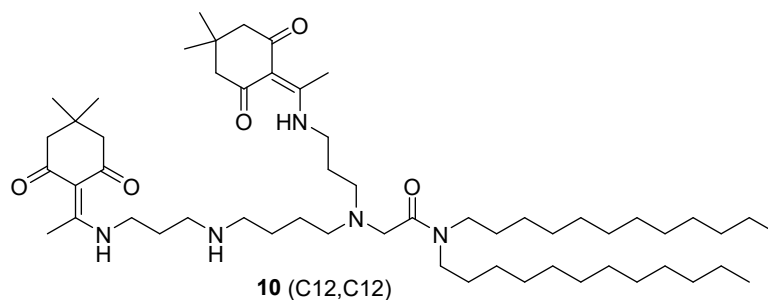

Yield: 72%; IR:  $\nu_{\max}$ , cm<sup>-1</sup>: 3437, 2923, 2854, 1638, 1572, 1460, 1369, 1334, 1295, 1141, 1089, 1029, 885, 722; <sup>1</sup>H NMR (400 MHz, CDCl<sub>3</sub>): δ 0.85 (t, *J* = 6.0 Hz, 6H, 2 × CH<sub>3</sub>), 1.00 (s, 12H, 2 × C(CH<sub>3</sub>)<sub>2</sub>), 1.23 (s, 36H, 2 × (CH<sub>2</sub>)<sub>9</sub>), 1.47 (m, 2H, CONCH<sub>2</sub>CH<sub>2</sub>), 1.51 (m, 2H, CONCH<sub>2</sub>CH<sub>2</sub>), 1.64 (br s, 2H, NHCH<sub>2</sub>CH<sub>2</sub>CH<sub>2</sub>CH<sub>2</sub>N), 1.89 (m, 2H, NCH<sub>2</sub>CH<sub>2</sub>CH<sub>2</sub>NHDde), 2.12 (br s, 2H, NHCH<sub>2</sub>CH<sub>2</sub>CH<sub>2</sub>CH<sub>2</sub>N), 2.33 (s, 10H, 4 × COCH<sub>2</sub>, DdeNHCH<sub>2</sub>CH<sub>2</sub>CH<sub>2</sub>NH), 2.54 and 2.55 (s, 6H, 2 × CH<sub>3</sub>C=C), 2.68 (m, 2H, NHCH<sub>2</sub>CH<sub>2</sub>CH<sub>2</sub>CH<sub>2</sub>N), 2.85 (m, 2H, NCH<sub>2</sub>CH<sub>2</sub>CH<sub>2</sub>NHDde), 2.96 (t, *J* = 5.2 Hz, 2H, NHCH<sub>2</sub>CH<sub>2</sub>CH<sub>2</sub>CH<sub>2</sub>N), 3.09 (t, *J* = 7.4 Hz, 2H, DdeNHCH<sub>2</sub>CH<sub>2</sub>CH<sub>2</sub>NH), 3.16 (t, *J* = 7.7 Hz, 2H, NCH<sub>2</sub>CH<sub>2</sub>), 3.27 (t, *J* = 7.7 Hz, 2H, NCH<sub>2</sub>CH<sub>2</sub>), 3.30 (s, 2H, NCH<sub>2</sub>CO), 3.45 (q, *J* = 5.3 Hz, 2H, NCH<sub>2</sub>CH<sub>2</sub>CH<sub>2</sub>NHDde), 3.55 (q, *J* = 5.5 Hz, 2H, DdeNHCH<sub>2</sub>CH<sub>2</sub>CH<sub>2</sub>NH), 13.46 (br s, 1H, NHDde), 13.50 (br s, 1H, NHDde); <sup>13</sup>C NMR (100 MHz, CDCl<sub>3</sub>): δ 14.1, 18.0, 18.1, 22.7, 25.4, 25.8, 26.9, 27.1, 27.7, 28.2, 29.3, 29.4, 29.6, 30.0, 31.9, 41.2, 41.5, 46.4, 46.6, 47.5, 48.5, 52.8, 53.5, 55.4, 55.8, 107.9, 108.1, 170.0, 173.8, 174.0, 197.8; HRMS (ESI-TOF), *m/z* calcd for C<sub>56</sub>H<sub>102</sub>N<sub>5</sub>O<sub>5</sub> [M+H]<sup>+</sup> 924.7875; found 924.7878.

**Compound 10 (C14,C14)**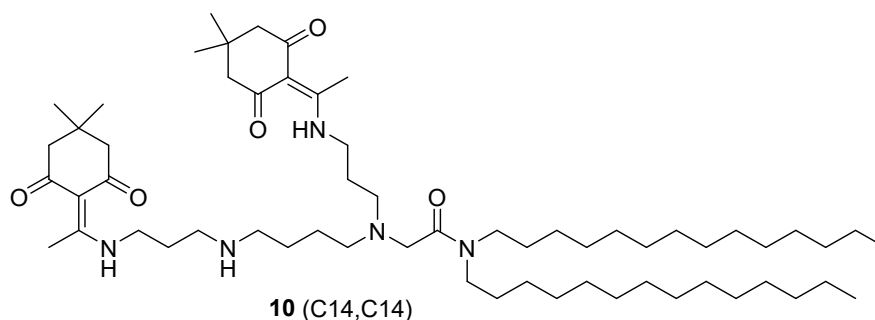

Yield: 66%; IR:  $\nu_{\max}$ ,  $\text{cm}^{-1}$ : 3434, 2922, 2853, 1639, 1573, 1461, 1369, 1334, 1295, 1140, 1092, 1030, 855, 721;  $^1\text{H}$  NMR (400 MHz,  $\text{CDCl}_3$ ):  $\delta$  0.85 (t,  $J = 6.6$  Hz, 6H,  $2 \times \text{CH}_3$ ), 1.00 (s, 12H,  $2 \times \text{C}(\text{CH}_3)_2$ ), 1.23 (s, 44H,  $2 \times (\text{CH}_2)_{11}$ ), 1.47 (m, 2H,  $\text{CONCH}_2\text{CH}_2$ ), 1.51 (m, 2H,  $\text{CONCH}_2\text{CH}_2$ ), 1.60 (br s, 2H,  $\text{NHCH}_2\text{CH}_2\text{CH}_2\text{CH}_2\text{N}$ ), 1.87 (m, 2H,  $\text{NCH}_2\text{CH}_2\text{CH}_2\text{NHDde}$ ), 2.01 (br s, 2H,  $\text{NHCH}_2\text{CH}_2\text{CH}_2\text{CH}_2\text{N}$ ), 2.25 (br s, 2H,  $\text{DdeNHCH}_2\text{CH}_2\text{CH}_2\text{NH}$ ), 2.33 (s, 8H,  $4 \times \text{COCH}_2$ ), 2.54 and 2.55 (s, 6H,  $2 \times \text{CH}_3\text{C}=\text{C}$ ), 2.66 (m, 2H,  $\text{NHCH}_2\text{CH}_2\text{CH}_2\text{CH}_2\text{N}$ ), 2.83 (m, 2H,  $\text{NCH}_2\text{CH}_2\text{CH}_2\text{NHDde}$ ), 2.90 (m, 2H,  $\text{NHCH}_2\text{CH}_2\text{CH}_2\text{CH}_2\text{N}$ ), 3.03 (m, 2H,  $\text{DdeNHCH}_2\text{CH}_2\text{CH}_2\text{NH}$ ), 3.17 (t,  $J = 7.7$  Hz, 2H,  $\text{NCH}_2\text{CH}_2$ ), 3.26 (t,  $J = 7.6$  Hz, 2H,  $\text{NCH}_2\text{CH}_2$ ), 3.29 (s, 2H,  $\text{NCH}_2\text{CO}$ ), 3.44 (q,  $J = 5.3$  Hz, 2H,  $\text{NCH}_2\text{CH}_2\text{CH}_2\text{NHDde}$ ), 3.53 (q,  $J = 5.4$  Hz, 2H,  $\text{DdeNHCH}_2\text{CH}_2\text{CH}_2\text{NH}$ ), 13.45 (br s, 1H,  $\text{NHDde}$ ), 13.49 (br s, 1H,  $\text{NHDde}$ );  $^{13}\text{C}$  NMR (100 MHz,  $\text{CDCl}_3$ ):  $\delta$  14.1, 18.0, 18.1, 22.7, 25.5, 26.1, 27.0, 27.1, 27.7, 28.3, 29.3, 29.4, 29.7, 30.1, 31.9, 41.2, 41.5, 46.5, 47.4, 48.7, 52.8, 53.2, 55.5, 55.6, 107.9, 108.1, 170.0, 173.8, 173.9, 197.8; HRMS (ESI-TOF),  $m/z$  calcd for  $\text{C}_{60}\text{H}_{110}\text{N}_5\text{O}_5$   $[\text{M}+\text{H}]^+$  980.8501; found 980.8503.

**Compound 10 (C16,C16)**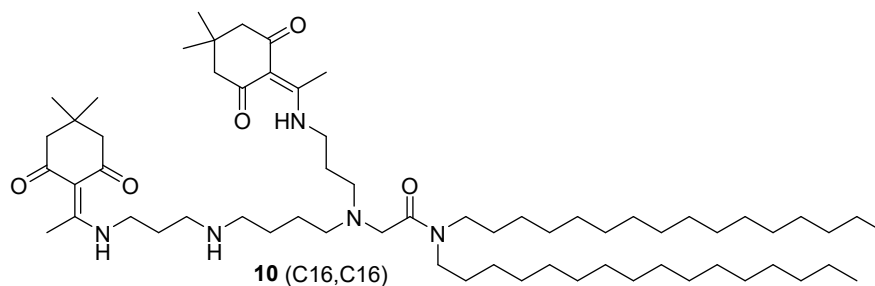

Yield: 84%; IR:  $\nu_{\max}$ ,  $\text{cm}^{-1}$ : 3419, 2923, 2853, 1638, 1573, 1462, 1369, 1335, 1302, 1142, 1096, 1032, 855, 721;  $^1\text{H}$  NMR (400 MHz,  $\text{CDCl}_3$ ):  $\delta$  0.85 (t,  $J = 6.7$  Hz, 6H,  $2 \times \text{CH}_3$ ), 1.00 (s, 12H,  $2 \times \text{C}(\text{CH}_3)_2$ ), 1.23 (s, 52H,  $2 \times (\text{CH}_2)_{13}$ ), 1.44 (m, 2H,  $\text{CONCH}_2\text{CH}_2$ ), 1.52 (m, 2H,

CONCH<sub>2</sub>CH<sub>2</sub>), 1.60 (br s, 2H, NHCH<sub>2</sub>CH<sub>2</sub>CH<sub>2</sub>CH<sub>2</sub>N), 1.87 (m, 2H, NCH<sub>2</sub>CH<sub>2</sub>CH<sub>2</sub>NHDde), 2.02 (br s, 2H, NHCH<sub>2</sub>CH<sub>2</sub>CH<sub>2</sub>CH<sub>2</sub>N), 2.26 (m, 2H, DdeNHCH<sub>2</sub>CH<sub>2</sub>CH<sub>2</sub>NH), 2.32 (s, 8H, 4 × COCH<sub>2</sub>), 2.53 and 2.54 (s, 6H, 2 × CH<sub>3</sub>C=C), 2.65 (m, 2H, NHCH<sub>2</sub>CH<sub>2</sub>CH<sub>2</sub>CH<sub>2</sub>N), 2.80 (m, 2H, NCH<sub>2</sub>CH<sub>2</sub>CH<sub>2</sub>NHDde), 2.90 (t, *J* = 5.2 Hz, 2H, NHCH<sub>2</sub>CH<sub>2</sub>CH<sub>2</sub>CH<sub>2</sub>N), 3.04 (t, *J* = 7.3 Hz, 2H, DdeNHCH<sub>2</sub>CH<sub>2</sub>CH<sub>2</sub>NH), 3.16 (t, *J* = 7.4 Hz, 2H, NCH<sub>2</sub>CH<sub>2</sub>), 3.26 (t, *J* = 7.8 Hz, 2H, NCH<sub>2</sub>CH<sub>2</sub>), 3.28 (s, 2H, NCH<sub>2</sub>CO), 3.43 (q, *J* = 5.3 Hz, 2H, NCH<sub>2</sub>CH<sub>2</sub>CH<sub>2</sub>NHDde), 3.55 (q, *J* = 5.2 Hz, 2H, DdeNHCH<sub>2</sub>CH<sub>2</sub>CH<sub>2</sub>NH), 13.45 (br s, 1H, NHDde), 13.48 (br s, 1H, NHDde); <sup>13</sup>C NMR (100 MHz, CDCl<sub>3</sub>): δ 14.1, 18.0, 18.1, 22.6, 25.4, 25.9, 26.9, 27.1, 27.7, 28.2, 29.3, 29.6, 29.7, 30.1, 31.9, 41.2, 41.6, 46.4, 46.5, 47.4, 48.6, 52.8, 53.2, 55.3, 55.6, 107.9, 108.0, 169.9, 173.8, 173.9, 197.8; HRMS (ESI-TOF), *m/z* calcd for C<sub>64</sub>H<sub>118</sub>N<sub>5</sub>O<sub>5</sub> [M+H]<sup>+</sup> 1036.9127; found 1036.9132.

### Compound 10 (C18,C18)

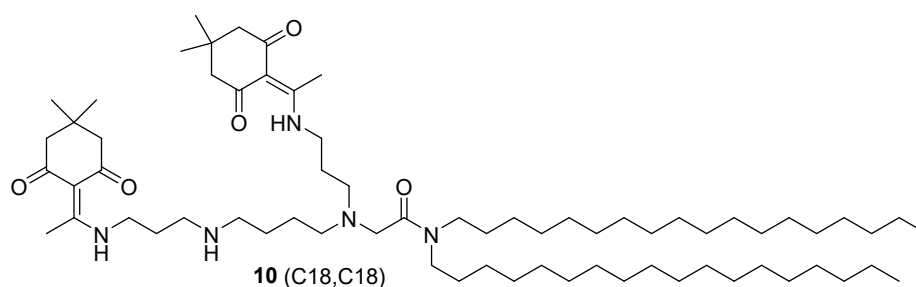

Yield: **estimated 63% (<95% purity)**; IR:  $\nu_{\max}$ , cm<sup>-1</sup>: 3418, 2918, 2851, 1634, 1570, 1463, 1369, 1337, 1299, 1144, 1092, 1026, 1026, 886, 720; <sup>1</sup>H NMR (400 MHz, CDCl<sub>3</sub>): δ 0.85 (t, *J* = 6.7 Hz, 6H, 2 × CH<sub>3</sub>), 1.00 (s, 12H, 2 × C(CH<sub>3</sub>)<sub>2</sub>), 1.23 (s, 60H, 2 × (CH<sub>2</sub>)<sub>15</sub>), 1.47 (m, 2H, CONCH<sub>2</sub>CH<sub>2</sub>), 1.53 (m, 2H, CONCH<sub>2</sub>CH<sub>2</sub>), 1.65 (br s, 2H, NHCH<sub>2</sub>CH<sub>2</sub>CH<sub>2</sub>CH<sub>2</sub>N), 1.88 (m, 2H, NCH<sub>2</sub>CH<sub>2</sub>CH<sub>2</sub>NHDde), 2.14 (br s, 2H, NHCH<sub>2</sub>CH<sub>2</sub>CH<sub>2</sub>CH<sub>2</sub>N), 2.32 (s, 10H, 4 × COCH<sub>2</sub>, DdeNHCH<sub>2</sub>CH<sub>2</sub>CH<sub>2</sub>NH), 2.53 and 2.54 (s, 6H, 2 × CH<sub>3</sub>C=C), 2.70 (m, 2H, NHCH<sub>2</sub>CH<sub>2</sub>CH<sub>2</sub>CH<sub>2</sub>N), 2.86 (m, 2H, NCH<sub>2</sub>CH<sub>2</sub>CH<sub>2</sub>NHDde), 3.00 (m, 2H, NHCH<sub>2</sub>CH<sub>2</sub>CH<sub>2</sub>CH<sub>2</sub>N), 3.12 (m, 2H, DdeNHCH<sub>2</sub>CH<sub>2</sub>CH<sub>2</sub>NH), 3.16 (m, 2H, NCH<sub>2</sub>CH<sub>2</sub>), 3.26 (m, 2H, NCH<sub>2</sub>CH<sub>2</sub>), 3.31 (s, 2H, NCH<sub>2</sub>CO), 3.46 (m, 2H, NCH<sub>2</sub>CH<sub>2</sub>CH<sub>2</sub>NHDde), 3.57 (m, 2H, DdeNHCH<sub>2</sub>CH<sub>2</sub>CH<sub>2</sub>NH), 13.45 (br s, 1H, NHDde), 13.50 (br s, 1H, NHDde); <sup>13</sup>C NMR (100 MHz, CDCl<sub>3</sub>): δ 14.1, 18.0, 18.1, 22.7, 25.4, 25.8, 26.9, 27.1, 27.7, 28.2, 29.3, 29.4, 29.7, 30.1, 31.9, 41.2, 41.5, 46.4, 46.6, 47.5, 48.5, 52.8, 53.6, 55.3, 55.9, 108.0, 108.1, 170.0, 173.9, 174.0, 198.0; HRMS (ESI-TOF), *m/z* calcd for C<sub>68</sub>H<sub>126</sub>N<sub>5</sub>O<sub>5</sub> [M+H]<sup>+</sup> 1092.9753; found 1092.9744.

**Compound 10 (C10,C12)**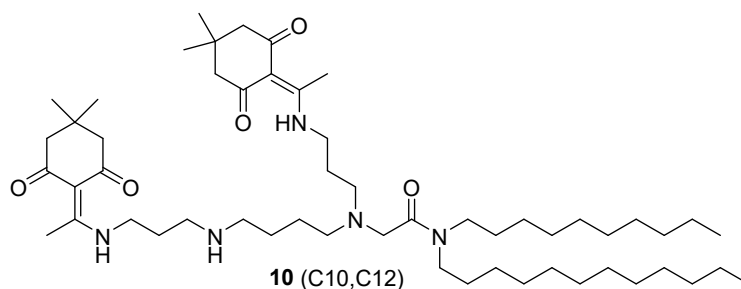

Yield: 76%; IR:  $\nu_{\max}$ ,  $\text{cm}^{-1}$ : 3426, 2924, 2854, 1636, 1571, 1461, 1369, 1333, 1298, 1141, 1092, 1030, 883, 722;  $^1\text{H}$  NMR (400 MHz,  $\text{CDCl}_3$ ):  $\delta$  0.85 (t,  $J = 6.3$  Hz, 6H,  $2 \times \text{CH}_3$ ), 1.00 (s, 12H,  $2 \times \text{C}(\text{CH}_3)_2$ ), 1.23 (s, 32H,  $2 \times (\text{CH}_2)_7$  and  $(\text{CH}_2)_9$ ), 1.45 (m, 2H,  $\text{CONCH}_2\text{CH}_2$ ), 1.52 (m, 2H,  $\text{CONCH}_2\text{CH}_2$ ), 1.60 (br s, 2H,  $\text{NHCH}_2\text{CH}_2\text{CH}_2\text{CH}_2\text{N}$ ), 1.88 (m, 2H,  $\text{NCH}_2\text{CH}_2\text{CH}_2\text{NHDde}$ ), 1.99 (br s, 2H,  $\text{NHCH}_2\text{CH}_2\text{CH}_2\text{CH}_2\text{N}$ ), 2.23 (m, 2H,  $\text{DdeNHCH}_2\text{CH}_2\text{CH}_2\text{NH}$ ), 2.32 (s, 8H,  $4 \times \text{COCH}_2$ ), 2.53 and 2.54 (s, 6H,  $2 \times \text{CH}_3\text{C}=\text{C}$ ), 2.65 (m, 2H,  $\text{NHCH}_2\text{CH}_2\text{CH}_2\text{CH}_2\text{N}$ ), 2.79 (m, 2H,  $\text{NCH}_2\text{CH}_2\text{CH}_2\text{NHDde}$ ), 2.88 (t,  $J = 5.5$  Hz, 2H,  $\text{NHCH}_2\text{CH}_2\text{CH}_2\text{CH}_2\text{N}$ ), 3.02 (t,  $J = 7.3$  Hz, 2H,  $\text{DdeNHCH}_2\text{CH}_2\text{CH}_2\text{NH}$ ), 3.16 (t,  $J = 7.7$  Hz, 2H,  $\text{NCH}_2\text{CH}_2$ ), 3.26 (t,  $J = 7.8$  Hz, 2H,  $\text{NCH}_2\text{CH}_2$ ), 3.28 (s, 2H,  $\text{NCH}_2\text{CO}$ ), 3.43 (q,  $J = 6.7$  Hz, 2H,  $\text{NCH}_2\text{CH}_2\text{CH}_2\text{NHDde}$ ), 3.55 (q,  $J = 6.5$  Hz, 2H,  $\text{DdeNHCH}_2\text{CH}_2\text{CH}_2\text{NH}$ ), 13.44 (br s, 1H,  $\text{NHDde}$ ), 13.48 (br s, 1H,  $\text{NHDde}$ );  $^{13}\text{C}$  NMR (100 MHz,  $\text{CDCl}_3$ ):  $\delta$  14.1, 17.9, 18.0, 22.6, 25.5, 26.4, 26.9, 27.1, 27.7, 28.2, 29.2, 29.3, 29.4, 29.5, 29.6, 30.1, 31.9, 41.2, 41.6, 46.4, 47.4, 48.6, 52.8, 53.1, 55.4, 55.6, 107.9, 108.0, 169.9, 173.7, 173.9, 197.8; HRMS (ESI-TOF),  $m/z$  calcd for  $\text{C}_{54}\text{H}_{98}\text{N}_5\text{O}_5$   $[\text{M}+\text{H}]^+$  896.7562; found 896.7583.

**Compound 10 (C10,C14)**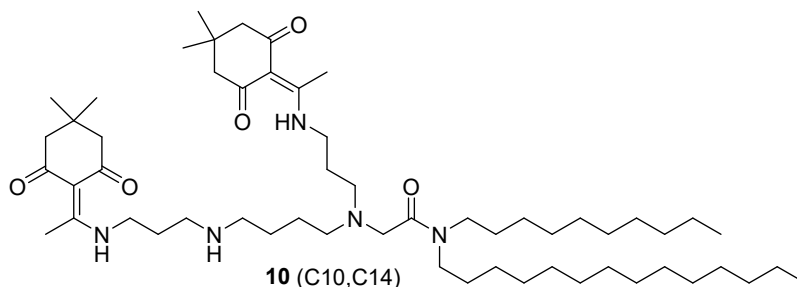

Yield: **estimated 64% (<95% purity)**; IR:  $\nu_{\max}$ ,  $\text{cm}^{-1}$ : 3424, 2923, 2854, 1638, 1570, 1461, 1368, 1333, 1297, 1142, 1095, 1030, 884, 722;  $^1\text{H}$  NMR (400 MHz,  $\text{CDCl}_3$ ):  $\delta$  0.85 (t,  $J = 6.5$  Hz, 6H,  $2 \times \text{CH}_3$ ), 1.00 (s, 12H,  $2 \times \text{C}(\text{CH}_3)_2$ ), 1.23 (s, 36H,  $(\text{CH}_2)_7$  and  $(\text{CH}_2)_{11}$ ), 1.45 (m, 2H,  $\text{CONCH}_2\text{CH}_2$ ), 1.52 (m, 2H,  $\text{CONCH}_2\text{CH}_2$ ), 1.63 (br s, 2H,  $\text{NHCH}_2\text{CH}_2\text{CH}_2\text{CH}_2\text{N}$ ), 1.88

(m, 2H,  $\text{NCH}_2\text{CH}_2\text{CH}_2\text{NHDde}$ ), 2.09 (br s, 2H,  $\text{NHCH}_2\text{CH}_2\text{CH}_2\text{CH}_2\text{N}$ ), 2.32 (s, 10H,  $4 \times \text{COCH}_2$ ,  $\text{DdeNHCH}_2\text{CH}_2\text{CH}_2\text{NH}$ ), 2.53 and 2.55 (s, 6H,  $2 \times \text{CH}_3\text{C}=\text{C}$ ), 2.68 (m, 2H,  $\text{NHCH}_2\text{CH}_2\text{CH}_2\text{CH}_2\text{N}$ ), 2.83 (m, 2H,  $\text{NCH}_2\text{CH}_2\text{CH}_2\text{NHDde}$ ), 2.94 (t,  $J = 5.8$  Hz, 2H,  $\text{NHCH}_2\text{CH}_2\text{CH}_2\text{CH}_2\text{N}$ ), 3.08 (t,  $J = 7.2$  Hz, 2H,  $\text{DdeNHCH}_2\text{CH}_2\text{CH}_2\text{NH}$ ), 3.16 (t,  $J = 7.0$  Hz, 2H,  $\text{NCH}_2\text{CH}_2$ ), 3.26 (t,  $J = 8.2$  Hz, 2H,  $\text{NCH}_2\text{CH}_2$ ), 3.29 (s, 2H,  $\text{NCH}_2\text{CO}$ ), 3.45 (q,  $J = 5.4$  Hz, 2H,  $\text{NCH}_2\text{CH}_2\text{CH}_2\text{NHDde}$ ), 3.55 (q,  $J = 5.4$  Hz, 2H,  $\text{DdeNHCH}_2\text{CH}_2\text{CH}_2\text{NH}$ ), 13.45 (br s, 1H,  $\text{NHDde}$ ), 13.49 (br s, 1H,  $\text{NHDde}$ );  $^{13}\text{C}$  NMR (100 MHz,  $\text{CDCl}_3$ ):  $\delta$  14.1, 18.0, 18.1, 22.6, 25.4, 25.8, 26.9, 27.1, 27.7, 28.2, 29.3, 29.4, 29.6, 30.1, 31.9, 41.2, 41.5, 46.4, 46.5, 47.5, 48.5, 52.8, 53.4, 55.4, 55.8, 107.9, 108.1, 170.0, 173.8, 174.0, 197.9; HRMS (ESI-TOF),  $m/z$  calcd for  $\text{C}_{56}\text{H}_{102}\text{N}_5\text{O}_5$   $[\text{M}+\text{H}]^+$  924.7875; found 924.7869.

### Compound 10 (C10,C16)

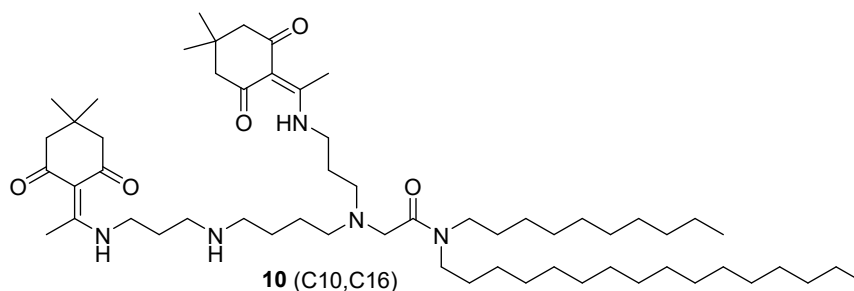

Yield: 67%; IR:  $\nu_{\text{max}}$ ,  $\text{cm}^{-1}$ : 3429, 2924, 2854, 1634, 1573, 1462, 1371, 1335, 1302, 1146, 1092, 1032, 889, 754;  $^1\text{H}$  NMR (400 MHz,  $\text{CDCl}_3$ ):  $\delta$  0.85 (t,  $J = 6.6$  Hz, 6H,  $2 \times \text{CH}_3$ ), 1.00 (s, 12H,  $2 \times \text{C}(\text{CH}_3)_2$ ), 1.23 (s, 40H,  $(\text{CH}_2)_7$  and  $(\text{CH}_2)_{13}$ ), 1.45 (m, 2H,  $\text{CONCH}_2\text{CH}_2$ ), 1.53 (m, 2H,  $\text{CONCH}_2\text{CH}_2$ ), 1.63 (br s, 2H,  $\text{NHCH}_2\text{CH}_2\text{CH}_2\text{CH}_2\text{N}$ ), 1.87 (m, 2H,  $\text{NCH}_2\text{CH}_2\text{CH}_2\text{NHDde}$ ), 2.01 (m, 2H,  $\text{NHCH}_2\text{CH}_2\text{CH}_2\text{CH}_2\text{N}$ ), 2.26 (m, 2H,  $\text{DdeNHCH}_2\text{CH}_2\text{CH}_2\text{NH}$ ), 2.33 (s, 8H,  $4 \times \text{COCH}_2$ ), 2.54 and 2.56 (s, 6H,  $2 \times \text{CH}_3\text{C}=\text{C}$ ), 2.70 (m, 2H,  $\text{NHCH}_2\text{CH}_2\text{CH}_2\text{CH}_2\text{N}$ ), 2.84 (m, 2H,  $\text{NCH}_2\text{CH}_2\text{CH}_2\text{NHDde}$ ), 2.94 (m, 2H,  $\text{NHCH}_2\text{CH}_2\text{CH}_2\text{CH}_2\text{N}$ ), 3.08 (m, 2H,  $\text{DdeNHCH}_2\text{CH}_2\text{CH}_2\text{NH}$ ), 3.16 (m, 2H,  $\text{NCH}_2\text{CH}_2$ ), 3.27 (m, 2H,  $\text{NCH}_2\text{CH}_2$ ), 3.30 (s, 2H,  $\text{NCH}_2\text{CO}$ ), 3.46 (q,  $J = 6.0$  Hz, 2H,  $\text{NCH}_2\text{CH}_2\text{CH}_2\text{NHDde}$ ), 3.56 (q,  $J = 5.3$  Hz, 2H,  $\text{DdeNHCH}_2\text{CH}_2\text{CH}_2\text{NH}$ ), 13.40 (br s, 1H,  $\text{NHDde}$ ), 13.46 (br s, 1H,  $\text{NHDde}$ );  $^{13}\text{C}$  NMR (100 MHz,  $\text{CDCl}_3$ ):  $\delta$  14.1, 18.0, 18.1, 22.6, 25.4, 25.8, 26.9, 27.1, 27.7, 28.2, 29.2, 29.3, 29.7, 30.1, 31.9, 41.0, 41.2, 46.4, 46.6, 47.5, 48.7, 52.8, 53.6, 55.4, 55.9, 108.0, 108.1, 170.0, 173.8, 174.0, 197.9; HRMS (ESI-TOF),  $m/z$  calcd for  $\text{C}_{58}\text{H}_{106}\text{N}_5\text{O}_5$   $[\text{M}+\text{H}]^+$  952.8188; found 952.8183.

**Compound 10 (C10,C18)**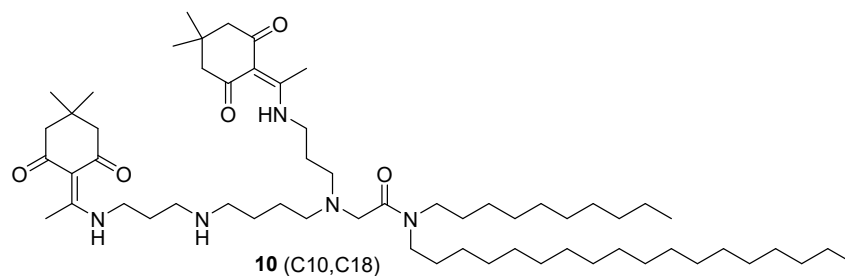

Yield: 72%; IR:  $\nu_{\max}$ ,  $\text{cm}^{-1}$ : 3419, 2923, 2854, 1637, 1572, 1461, 1369, 1334, 1298, 1141, 1096, 1031, 883, 721;  $^1\text{H}$  NMR (400 MHz,  $\text{CDCl}_3$ ):  $\delta$  0.85 (t,  $J = 6.6$  Hz, 6H,  $2 \times \text{CH}_3$ ), 1.00 (s, 12H,  $2 \times \text{C}(\text{CH}_3)_2$ ), 1.23 (s, 44H,  $(\text{CH}_2)_7$  and  $(\text{CH}_2)_{15}$ ), 1.45 (m, 2H,  $\text{CONCH}_2\text{CH}_2$ ), 1.52 (m, 2H,  $\text{CONCH}_2\text{CH}_2$ ), 1.58 (m, 2H,  $\text{NHCH}_2\text{CH}_2\text{CH}_2\text{CH}_2\text{N}$ ), 1.86 (m, 2H,  $\text{NCH}_2\text{CH}_2\text{CH}_2\text{NHDde}$ ), 1.94 (m, 2H,  $\text{NHCH}_2\text{CH}_2\text{CH}_2\text{CH}_2\text{N}$ ), 2.20 (m, 2H,  $\text{DdeNHCH}_2\text{CH}_2\text{CH}_2\text{NH}$ ), 2.32 (s, 8H,  $4 \times \text{COCH}_2$ ), 2.53 and 2.54 (s, 6H,  $2 \times \text{CH}_3\text{C}=\text{C}$ ), 2.63 (t,  $J = 5.5$  Hz, 2H,  $\text{NHCH}_2\text{CH}_2\text{CH}_2\text{CH}_2\text{N}$ ), 2.78 (m, 2H,  $\text{NCH}_2\text{CH}_2\text{CH}_2\text{NHDde}$ ), 2.86 (m, 2H,  $\text{NHCH}_2\text{CH}_2\text{CH}_2\text{CH}_2\text{N}$ ), 3.00 (m, 2H,  $\text{DdeNHCH}_2\text{CH}_2\text{CH}_2\text{NH}$ ), 3.17 (m, 2H,  $\text{NCH}_2\text{CH}_2$ ), 3.26 (m, 2H,  $\text{NCH}_2\text{CH}_2$ ), 3.28 (s, 2H,  $\text{NCH}_2\text{CO}$ ), 3.43 (q,  $J = 5.3$  Hz, 2H,  $\text{NCH}_2\text{CH}_2\text{CH}_2\text{NHDde}$ ), 3.55 (q,  $J = 6.5$  Hz, 2H,  $\text{DdeNHCH}_2\text{CH}_2\text{CH}_2\text{NH}$ ), 13.43 (br s, 1H,  $\text{NHDde}$ ), 13.47 (br s, 1H,  $\text{NHDde}$ );  $^{13}\text{C}$  NMR (100 MHz,  $\text{CDCl}_3$ ):  $\delta$  14.1, 17.9, 18.0, 22.7, 25.5, 26.1, 26.9, 27.1, 27.7, 28.2, 29.3, 29.6, 29.7, 30.1, 31.9, 41.2, 41.6, 46.4, 47.4, 48.7, 52.8, 53.0, 55.4, 107.9, 108.0, 169.9, 173.7, 173.9, 197.8; HRMS (ESI-TOF),  $m/z$  calcd for  $\text{C}_{60}\text{H}_{110}\text{N}_5\text{O}_5$   $[\text{M}+\text{H}]^+$  980.8501; found 980.8500.

**Compound 10 (C12,C14)**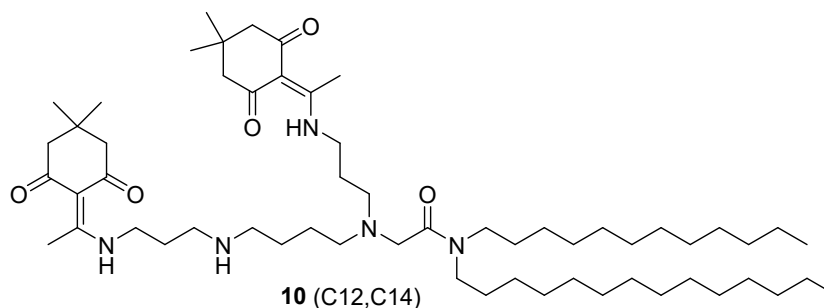

Yield: 67%; IR:  $\nu_{\max}$ ,  $\text{cm}^{-1}$ : 3433, 2923, 2854, 1636, 1571, 1461, 1368, 1334, 1298, 1141, 1096, 1030, 884, 721;  $^1\text{H}$  NMR (400 MHz,  $\text{CDCl}_3$ ):  $\delta$  0.85 (t,  $J = 6.4$  Hz, 6H,  $2 \times \text{CH}_3$ ), 1.00 (s, 12H,  $2 \times \text{C}(\text{CH}_3)_2$ ), 1.23 (s, 40H,  $(\text{CH}_2)_9$  and  $(\text{CH}_2)_{11}$ ), 1.45 (m, 2H,  $\text{CONCH}_2\text{CH}_2$ ), 1.51

(m, 2H, CONCH<sub>2</sub>CH<sub>2</sub>), 1.62 (m, 2H, NHCH<sub>2</sub>CH<sub>2</sub>CH<sub>2</sub>CH<sub>2</sub>N), 1.88 (m, 2H, NCH<sub>2</sub>CH<sub>2</sub>CH<sub>2</sub>NHDde), 2.06 (m, 2H, NHCH<sub>2</sub>CH<sub>2</sub>CH<sub>2</sub>CH<sub>2</sub>N), 2.29 (m, 2H, DdeNHCH<sub>2</sub>CH<sub>2</sub>CH<sub>2</sub>NH), 2.33 (s, 8H, 4 × COCH<sub>2</sub>), 2.54 and 2.55 (s, 6H, 2 × CH<sub>3</sub>C=C), 2.67 (t, *J* = 5.3 Hz, 2H, NHCH<sub>2</sub>CH<sub>2</sub>CH<sub>2</sub>CH<sub>2</sub>N), 2.82 (m, 2H, NCH<sub>2</sub>CH<sub>2</sub>CH<sub>2</sub>NHDde), 2.93 (t, *J* = 5.2 Hz, 2H, NHCH<sub>2</sub>CH<sub>2</sub>CH<sub>2</sub>CH<sub>2</sub>N), 3.07 (t, *J* = 7.3 Hz, 2H, DdeNHCH<sub>2</sub>CH<sub>2</sub>CH<sub>2</sub>NH), 3.16 (t, *J* = 7.7 Hz, 2H, NCH<sub>2</sub>CH<sub>2</sub>), 3.26 (m, 2H, NCH<sub>2</sub>CH<sub>2</sub>), 3.29 (s, 2H, NCH<sub>2</sub>CO), 3.45 (q, *J* = 5.3 Hz, 2H, NCH<sub>2</sub>CH<sub>2</sub>CH<sub>2</sub>NHDde), 3.54 (q, *J* = 5.5 Hz, 2H, DdeNHCH<sub>2</sub>CH<sub>2</sub>CH<sub>2</sub>NH), 13.45 (br s, 1H, NHDde), 13.49 (br s, 1H, NHDde); <sup>13</sup>C NMR (100 MHz, CDCl<sub>3</sub>): δ 14.1, 18.0, 18.1, 22.7, 25.4, 25.9, 26.9, 27.1, 27.7, 28.2, 29.3, 29.4, 29.6, 30.1, 31.9, 41.2, 41.5, 46.4, 46.5, 47.5, 48.6, 52.8, 53.4, 55.4, 55.8, 107.9, 108.1, 170.0, 173.8, 173.9, 197.8; HRMS (ESI-TOF), *m/z* calcd for C<sub>58</sub>H<sub>106</sub>N<sub>5</sub>O<sub>5</sub> [M+H]<sup>+</sup> 952.8188; found 952.8193.

### Compound 10 (C12,C16)

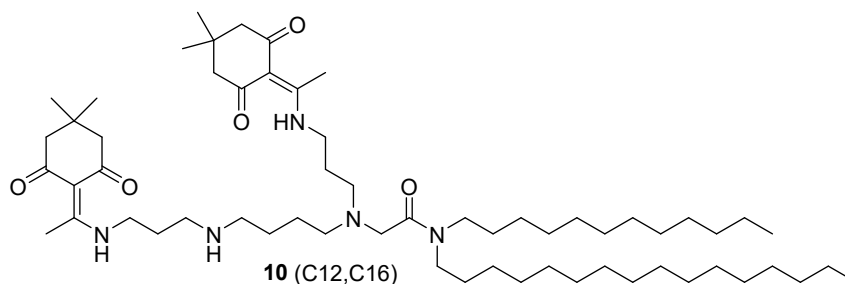

Yield: 72%; IR:  $\nu_{\max}$ , cm<sup>-1</sup>: 3438, 2923, 2853, 1637, 1571, 1461, 1369, 1334, 1298, 1142, 1095, 1030, 884, 722; <sup>1</sup>H NMR (400 MHz, CDCl<sub>3</sub>): δ 0.85 (t, *J* = 6.5 Hz, 6H, 2 × CH<sub>3</sub>), 1.00 (s, 12H, 2 × C(CH<sub>3</sub>)<sub>2</sub>), 1.23 (s, 44H, (CH<sub>2</sub>)<sub>9</sub> and (CH<sub>2</sub>)<sub>13</sub>), 1.45 (m, 2H, CONCH<sub>2</sub>CH<sub>2</sub>), 1.52 (m, 2H, CONCH<sub>2</sub>CH<sub>2</sub>), 1.64 (br s, 2H, NHCH<sub>2</sub>CH<sub>2</sub>CH<sub>2</sub>CH<sub>2</sub>N), 1.89 (m, 2H, NCH<sub>2</sub>CH<sub>2</sub>CH<sub>2</sub>NHDde), 2.11 (br s, 2H, NHCH<sub>2</sub>CH<sub>2</sub>CH<sub>2</sub>CH<sub>2</sub>N), 2.32 (s, 10H, 4 × COCH<sub>2</sub>, DdeNHCH<sub>2</sub>CH<sub>2</sub>CH<sub>2</sub>NH), 2.54 and 2.55 (s, 6H, 2 × CH<sub>3</sub>C=C), 2.68 (m, 2H, NHCH<sub>2</sub>CH<sub>2</sub>CH<sub>2</sub>CH<sub>2</sub>N), 2.85 (m, 2H, NCH<sub>2</sub>CH<sub>2</sub>CH<sub>2</sub>NHDde), 2.95 (t, *J* = 5.2 Hz, 2H, NHCH<sub>2</sub>CH<sub>2</sub>CH<sub>2</sub>CH<sub>2</sub>N), 3.09 (t, *J* = 7.3 Hz, 2H, DdeNHCH<sub>2</sub>CH<sub>2</sub>CH<sub>2</sub>NH), 3.16 (t, *J* = 7.4 Hz, 2H, NCH<sub>2</sub>CH<sub>2</sub>), 3.26 (t, *J* = 7.7 Hz, 2H, NCH<sub>2</sub>CH<sub>2</sub>), 3.30 (s, 2H, NCH<sub>2</sub>CO), 3.45 (q, *J* = 5.3 Hz, 2H, NCH<sub>2</sub>CH<sub>2</sub>CH<sub>2</sub>NHDde), 3.56 (q, *J* = 6.6 Hz, 2H, DdeNHCH<sub>2</sub>CH<sub>2</sub>CH<sub>2</sub>NH), 13.45 (br s, 1H, NHDde), 13.50 (br s, 1H, NHDde); <sup>13</sup>C NMR (100 MHz, CDCl<sub>3</sub>): δ 14.1, 18.0, 18.1, 22.6, 25.4, 25.6, 26.9, 27.1, 27.7, 28.2, 29.3, 29.6, 29.7, 30.1, 31.9, 41.2, 41.5, 46.4, 46.6, 47.5, 48.5, 52.8, 53.5, 55.4, 55.9, 108.0, 108.1, 170.0, 173.8, 174.0, 197.8; HRMS (ESI-TOF), *m/z* calcd for C<sub>60</sub>H<sub>110</sub>N<sub>5</sub>O<sub>5</sub> [M+H]<sup>+</sup> 980.8501; found 980.8503.



**Compound 10 (C12,C18)**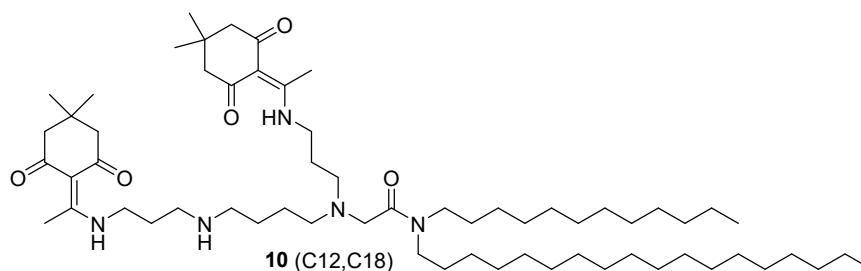

Yield: 67%; IR:  $\nu_{\max}$ ,  $\text{cm}^{-1}$ : 3434, 2922, 2853, 1638, 1572, 1461, 1369, 1334, 1298, 1142, 1094, 1030, 884, 721;  $^1\text{H}$  NMR (400 MHz,  $\text{CDCl}_3$ ):  $\delta$  0.85 (t,  $J = 6.6$  Hz, 6H,  $2 \times \text{CH}_3$ ), 1.00 (s, 12H,  $2 \times \text{C}(\text{CH}_3)_2$ ), 1.23 (s, 48H,  $(\text{CH}_2)_9$  and  $(\text{CH}_2)_{15}$ ), 1.45 (m, 2H,  $\text{CONCH}_2\text{CH}_2$ ), 1.52 (m, 2H,  $\text{CONCH}_2\text{CH}_2$ ), 1.64 (br s, 2H,  $\text{NHCH}_2\text{CH}_2\text{CH}_2\text{CH}_2\text{N}$ ), 1.89 (m, 2H,  $\text{NCH}_2\text{CH}_2\text{CH}_2\text{NHDde}$ ), 2.13 (br s, 2H,  $\text{NHCH}_2\text{CH}_2\text{CH}_2\text{CH}_2\text{N}$ ), 2.33 (s, 10H,  $4 \times \text{COCH}_2$ ,  $\text{DdeNHCH}_2\text{CH}_2\text{CH}_2\text{NH}$ ), 2.54 and 2.55 (s, 6H,  $2 \times \text{CH}_3\text{C}=\text{C}$ ), 2.69 (t,  $J = 4.8$  Hz, 2H,  $\text{NHCH}_2\text{CH}_2\text{CH}_2\text{CH}_2\text{N}$ ), 2.85 (m, 2H,  $\text{NCH}_2\text{CH}_2\text{CH}_2\text{NHDde}$ ), 2.94 (t,  $J = 5.2$  Hz, 2H,  $\text{NHCH}_2\text{CH}_2\text{CH}_2\text{CH}_2\text{N}$ ), 3.09 (t,  $J = 7.4$  Hz, 2H,  $\text{DdeNHCH}_2\text{CH}_2\text{CH}_2\text{NH}$ ), 3.16 (t,  $J = 7.7$  Hz, 2H,  $\text{NCH}_2\text{CH}_2$ ), 3.27 (t,  $J = 7.9$  Hz, 2H,  $\text{NCH}_2\text{CH}_2$ ), 3.30 (s, 2H,  $\text{NCH}_2\text{CO}$ ), 3.45 (q,  $J = 5.3$  Hz, 2H,  $\text{NCH}_2\text{CH}_2\text{CH}_2\text{NHDde}$ ), 3.55 (q,  $J = 5.5$  Hz, 2H,  $\text{DdeNHCH}_2\text{CH}_2\text{CH}_2\text{NH}$ ), 13.46 (br s, 1H,  $\text{NHDde}$ ), 13.50 (br s, 1H,  $\text{NHDde}$ );  $^{13}\text{C}$  NMR (100 MHz,  $\text{CDCl}_3$ ):  $\delta$  14.1, 18.0, 18.1, 22.7, 25.4, 25.8, 26.9, 27.1, 27.7, 28.2, 29.3, 29.4, 29.7, 30.1, 31.9, 41.2, 41.5, 46.4, 46.6, 47.5, 48.5, 52.8, 53.6, 55.4, 55.9, 108.0, 108.1, 170.0, 173.8, 174.0, 197.8; HRMS (ESI-TOF),  $m/z$  calcd for  $\text{C}_{62}\text{H}_{114}\text{N}_5\text{O}_5$   $[\text{M}+\text{H}]^+$  1008.8814; found 1008.8808.

**Compound 10 (C14,C16)**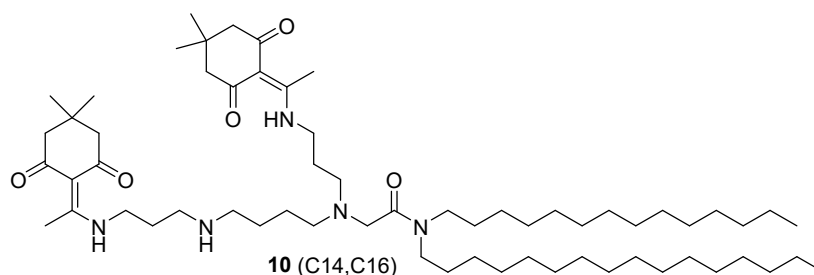

Yield: 68%; IR:  $\nu_{\max}$ ,  $\text{cm}^{-1}$ : 3435, 2922, 2853, 1638, 1572, 1461, 1369, 1335, 1298, 1142, 1092, 1030, 884, 721;  $^1\text{H}$  NMR (400 MHz,  $\text{CDCl}_3$ ):  $\delta$  0.85 (t,  $J = 6.6$  Hz, 6H,  $2 \times \text{CH}_3$ ), 1.00 (s, 12H,  $2 \times \text{C}(\text{CH}_3)_2$ ), 1.23 (s, 48H,  $(\text{CH}_2)_{11}$  and  $(\text{CH}_2)_{13}$ ), 1.45 (m, 2H,  $\text{CONCH}_2\text{CH}_2$ ), 1.52 (m, 2H,  $\text{CONCH}_2\text{CH}_2$ ), 1.64 (br s, 2H,  $\text{NHCH}_2\text{CH}_2\text{CH}_2\text{CH}_2\text{N}$ ), 1.89 (m, 2H,

NCH<sub>2</sub>CH<sub>2</sub>CH<sub>2</sub>NHDde), 2.13 (br s, 2H, NHCH<sub>2</sub>CH<sub>2</sub>CH<sub>2</sub>CH<sub>2</sub>N), 2.32 (s, 10H, 4 × COCH<sub>2</sub>, DdeNHCH<sub>2</sub>CH<sub>2</sub>CH<sub>2</sub>NH), 2.53 and 2.55 (s, 6H, 2 × CH<sub>3</sub>C=C), 2.69 (t, *J* = 4.7 Hz, 2H, NHCH<sub>2</sub>CH<sub>2</sub>CH<sub>2</sub>CH<sub>2</sub>N), 2.86 (m, 2H, NCH<sub>2</sub>CH<sub>2</sub>CH<sub>2</sub>NHDde), 2.96 (t, *J* = 5.1 Hz, 2H, NHCH<sub>2</sub>CH<sub>2</sub>CH<sub>2</sub>CH<sub>2</sub>N), 3.10 (t, *J* = 7.4 Hz, 2H, DdeNHCH<sub>2</sub>CH<sub>2</sub>CH<sub>2</sub>NH), 3.16 (t, *J* = 7.6 Hz, 2H, NCH<sub>2</sub>CH<sub>2</sub>), 3.26 (t, *J* = 7.6 Hz, 2H, NCH<sub>2</sub>CH<sub>2</sub>), 3.30 (s, 2H, NCH<sub>2</sub>CO), 3.45 (q, *J* = 5.4 Hz, 2H, NCH<sub>2</sub>CH<sub>2</sub>CH<sub>2</sub>NHDde), 3.56 (q, *J* = 5.5 Hz, 2H, DdeNHCH<sub>2</sub>CH<sub>2</sub>CH<sub>2</sub>NH), 13.46 (br s, 1H, NHDde), 13.50 (br s, 1H, NHDde); <sup>13</sup>C NMR (100 MHz, CDCl<sub>3</sub>): δ 14.1, 18.0, 18.1, 22.7, 25.4, 25.8, 26.9, 27.1, 27.7, 28.2, 29.3, 29.6, 29.7, 30.0, 31.9, 41.2, 41.5, 46.4, 46.6, 47.5, 48.5, 52.8, 53.6, 55.4, 55.9, 108.0, 108.1, 170.0, 173.8, 174.0, 197.8; HRMS (ESI-TOF), *m/z* calcd for C<sub>62</sub>H<sub>114</sub>N<sub>5</sub>O<sub>5</sub> [M+H]<sup>+</sup> 1008.8814; found 1008.8818.

### Compound 10 (C14,C18)

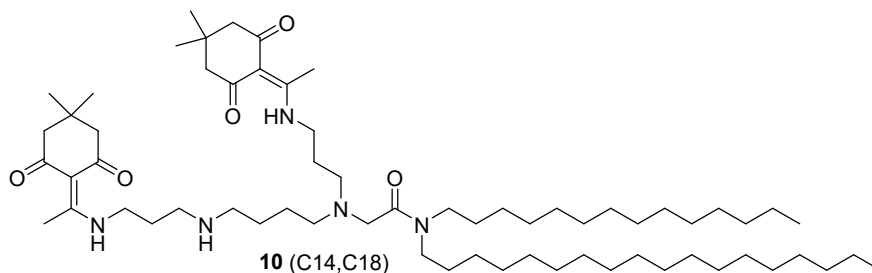

Yield: 69%; IR:  $\nu_{\max}$ , cm<sup>-1</sup>: 3443, 2922, 2853, 1637, 1572, 1461, 1368, 1335, 1298, 1142, 1094, 1030, 884, 721; <sup>1</sup>H NMR (400 MHz, CDCl<sub>3</sub>): δ 0.85 (t, *J* = 6.6 Hz, 6H, 2 × CH<sub>3</sub>), 1.00 (s, 12H, 2 × C(CH<sub>3</sub>)<sub>2</sub>), 1.23 (s, 52H, (CH<sub>2</sub>)<sub>11</sub> and (CH<sub>2</sub>)<sub>15</sub>), 1.45 (m, 2H, CONCH<sub>2</sub>CH<sub>2</sub>), 1.52 (m, 2H, CONCH<sub>2</sub>CH<sub>2</sub>), 1.64 (br s, 2H, NHCH<sub>2</sub>CH<sub>2</sub>CH<sub>2</sub>CH<sub>2</sub>N), 1.89 (m, 2H, NCH<sub>2</sub>CH<sub>2</sub>CH<sub>2</sub>NHDde), 2.13 (br s, 2H, NHCH<sub>2</sub>CH<sub>2</sub>CH<sub>2</sub>CH<sub>2</sub>N), 2.32 (s, 10H, 4 × COCH<sub>2</sub>, DdeNHCH<sub>2</sub>CH<sub>2</sub>CH<sub>2</sub>NH), 2.54 and 2.55 (s, 6H, 2 × CH<sub>3</sub>C=C), 2.69 (t, *J* = 4.5 Hz, 2H, NHCH<sub>2</sub>CH<sub>2</sub>CH<sub>2</sub>CH<sub>2</sub>N), 2.86 (m, 2H, NCH<sub>2</sub>CH<sub>2</sub>CH<sub>2</sub>NHDde), 2.96 (t, *J* = 4.7 Hz, 2H, NHCH<sub>2</sub>CH<sub>2</sub>CH<sub>2</sub>CH<sub>2</sub>N), 3.09 (t, *J* = 7.3 Hz, 2H, DdeNHCH<sub>2</sub>CH<sub>2</sub>CH<sub>2</sub>NH), 3.16 (t, *J* = 7.5 Hz, 2H, NCH<sub>2</sub>CH<sub>2</sub>), 3.27 (t, *J* = 7.4 Hz, 2H, NCH<sub>2</sub>CH<sub>2</sub>), 3.30 (s, 2H, NCH<sub>2</sub>CO), 3.45 (q, *J* = 5.5 Hz, 2H, NCH<sub>2</sub>CH<sub>2</sub>CH<sub>2</sub>NHDde), 3.56 (q, *J* = 5.5 Hz, 2H, DdeNHCH<sub>2</sub>CH<sub>2</sub>CH<sub>2</sub>NH), 13.46 (br s, 1H, NHDde), 13.50 (br s, 1H, NHDde); <sup>13</sup>C NMR (100 MHz, CDCl<sub>3</sub>): δ 14.1, 18.0, 18.1, 22.7, 25.4, 25.8, 26.9, 27.1, 27.7, 28.2, 29.3, 29.4, 29.7, 30.0, 31.9, 41.2, 41.5, 46.4, 46.6, 47.5, 48.5, 52.8, 53.6, 55.4, 55.9, 108.0, 108.1, 170.0, 173.8, 174.0, 197.8; HRMS (ESI-TOF), *m/z* calcd for C<sub>64</sub>H<sub>118</sub>N<sub>5</sub>O<sub>5</sub> [M+H]<sup>+</sup> 1036.9127; found 1036.9129.

**Compound 10 (C16,C18)**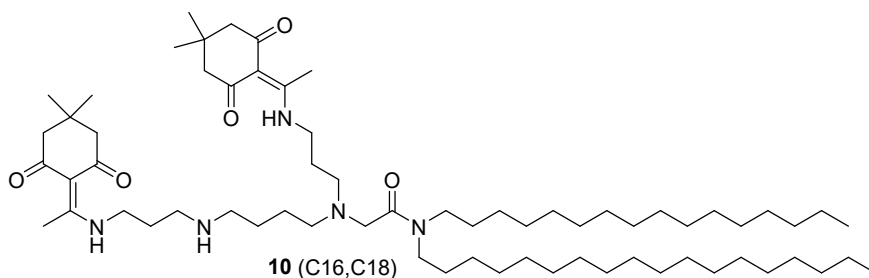

Yield: 65%; IR:  $\nu_{\max}$ ,  $\text{cm}^{-1}$ : 3443, 2921, 2852, 1636, 1572, 1463, 1368, 1337, 1305, 1143, 1092, 1029, 884, 721;  $^1\text{H NMR}$  (400 MHz,  $\text{CDCl}_3$ ):  $\delta$  0.85 (t,  $J = 6.6$  Hz, 6H,  $2 \times \text{CH}_3$ ), 1.00 (s, 12H,  $2 \times \text{C}(\text{CH}_3)_2$ ), 1.23 (s, 56H,  $(\text{CH}_2)_{13}$  and  $(\text{CH}_2)_{15}$ ), 1.45 (m, 2H,  $\text{CONCH}_2\text{CH}_2$ ), 1.53 (m, 2H,  $\text{CONCH}_2\text{CH}_2$ ), 1.65 (br s, 2H,  $\text{NHCH}_2\text{CH}_2\text{CH}_2\text{CH}_2\text{N}$ ), 1.90 (m, 2H,  $\text{NCH}_2\text{CH}_2\text{CH}_2\text{NHDde}$ ), 2.14 (br s, 2H,  $\text{NHCH}_2\text{CH}_2\text{CH}_2\text{CH}_2\text{N}$ ), 2.33 (s, 10H,  $4 \times \text{COCH}_2$ ,  $\text{DdeNHCH}_2\text{CH}_2\text{CH}_2\text{NH}$ ), 2.54 and 2.55 (s, 6H,  $2 \times \text{CH}_3\text{C}=\text{C}$ ), 2.69 (t,  $J = 4.2$  Hz, 2H,  $\text{NHCH}_2\text{CH}_2\text{CH}_2\text{CH}_2\text{N}$ ), 2.86 (m, 2H,  $\text{NCH}_2\text{CH}_2\text{CH}_2\text{NHDde}$ ), 2.96 (t,  $J = 5.0$  Hz, 2H,  $\text{NHCH}_2\text{CH}_2\text{CH}_2\text{CH}_2\text{N}$ ), 3.10 (t,  $J = 7.4$  Hz, 2H,  $\text{DdeNHCH}_2\text{CH}_2\text{CH}_2\text{NH}$ ), 3.16 (t,  $J = 7.6$  Hz, 2H,  $\text{NCH}_2\text{CH}_2$ ), 3.26 (t,  $J = 7.6$  Hz, 2H,  $\text{NCH}_2\text{CH}_2$ ), 3.30 (s, 2H,  $\text{NCH}_2\text{CO}$ ), 3.45 (q,  $J = 5.3$  Hz, 2H,  $\text{NCH}_2\text{CH}_2\text{CH}_2\text{NHDde}$ ), 3.57 (q,  $J = 5.5$  Hz, 2H,  $\text{DdeNHCH}_2\text{CH}_2\text{CH}_2\text{NH}$ ), 13.46 (br s, 1H,  $\text{NHDde}$ ), 13.50 (br s, 1H,  $\text{NHDde}$ );  $^{13}\text{C NMR}$  (100 MHz,  $\text{CDCl}_3$ ):  $\delta$  14.1, 18.0, 18.1, 22.7, 25.4, 25.8, 26.9, 27.1, 27.7, 28.3, 29.3, 29.6, 29.7, 30.1, 31.9, 41.2, 41.5, 46.4, 46.6, 47.5, 48.5, 52.8, 53.6, 55.4, 56.0, 108.0, 108.1, 170.0, 173.8, 174.0, 197.8; HRMS (ESI-TOF),  $m/z$  calcd for  $\text{C}_{66}\text{H}_{112}\text{N}_5\text{O}_5$   $[\text{M}+\text{H}]^+$  1064.9440; found 1064.9419.

**Lipid ST1**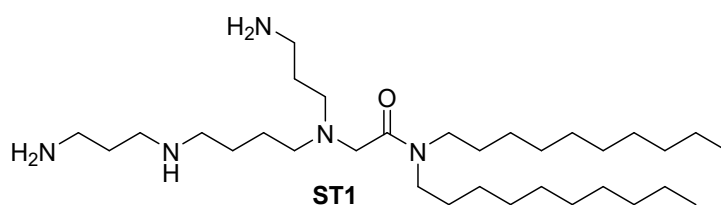

Yield: 75%; IR:  $\nu_{\max}$ ,  $\text{cm}^{-1}$ : 3402, 3265, 2922, 2853, 1635, 1548, 1460, 1374, 1276, 1110, 1074, 751, 722;  $^1\text{H NMR}$  (400 MHz,  $\text{CDCl}_3$ ):  $\delta$  0.86 (t,  $J = 6.7$  Hz, 6H,  $2 \times \text{CH}_3$ ), 1.23 (s, 28H,  $2 \times (\text{CH}_2)_7$ ), 1.47–1.53 (m, 6H,  $2 \times \text{NCH}_2\text{CH}_2$ ,  $\text{NHCH}_2\text{CH}_2\text{CH}_2\text{CH}_2\text{N}$ ), 1.65 (m, 2H,  $\text{NHCH}_2\text{CH}_2\text{CH}_2\text{CH}_2\text{N}$ ), 1.82 (m, 2H,  $\text{NCH}_2\text{CH}_2\text{CH}_2\text{NH}_2$ ), 1.89–1.91 (m, 2H,  $\text{NH}_2\text{CH}_2\text{CH}_2\text{CH}_2\text{NH}$ ), 2.46 (t,  $J = 6.6$  Hz, 2H,  $\text{NHCH}_2\text{CH}_2\text{CH}_2\text{CH}_2\text{N}$ ), 2.53 (t,  $J = 5.3$  Hz,

2H,  $\text{NCH}_2\text{CH}_2\text{CH}_2\text{NH}_2$ ), 2.74 (t,  $J = 6.4$  Hz, 2H,  $\text{NHCH}_2\text{CH}_2\text{CH}_2\text{CH}_2\text{N}$ ), 2.90 (t,  $J = 6.1$  Hz, 2H,  $\text{NH}_2\text{CH}_2\text{CH}_2\text{CH}_2\text{NH}$ ), 2.97 (t,  $J = 5.9$  Hz, 2H,  $\text{NH}_2\text{CH}_2\text{CH}_2\text{CH}_2\text{NH}$ ), 3.07 (br s, 2H,  $\text{NCH}_2\text{CH}_2\text{CH}_2\text{NH}_2$ ), 3.20 (m, 2H,  $\text{NCH}_2\text{CO}$ ), 3.13 (t,  $J = 7.8$  Hz, 2H,  $\text{NCH}_2\text{CH}_2$ ), 3.23 (m, 2H,  $\text{NCH}_2\text{CH}_2$ );  $^{13}\text{C}$  NMR (100 MHz,  $\text{CDCl}_3$ ):  $\delta$  14.2, 22.7, 24.5, 25.1, 26.0, 26.9, 27.1, 27.0, 29.0, 29.3, 29.4, 29.5, 29.6, 29.7, 31.9, 39.8, 40.5, 46.5, 47.3, 47.7, 48.5, 53.8, 54.7, 55.8, 170.2; HRMS (ESI-TOF),  $m/z$  calcd for  $\text{C}_{32}\text{H}_{70}\text{N}_5\text{O}$   $[\text{M}+\text{H}]^+$  540.5575; found 540.5585.

### Lipid ST2

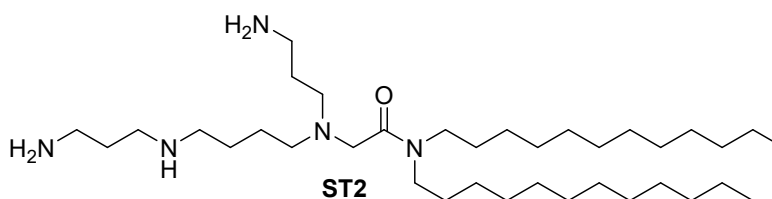

Yield: 72%; IR:  $\nu_{\text{max}}$ ,  $\text{cm}^{-1}$ : 3430, 2921, 2852, 1628, 1460, 1374, 1312, 1266, 1123, 1077, 751, 722;  $^1\text{H}$  NMR (400 MHz,  $\text{CDCl}_3$ ):  $\delta$  0.86 (t,  $J = 5.9$  Hz, 6H,  $2 \times \text{CH}_3$ ), 1.23 (s, 36H,  $2 \times (\text{CH}_2)_9$ ), 1.48 (m, 6H,  $2 \times \text{NCH}_2\text{CH}_2$ ,  $\text{NHCH}_2\text{CH}_2\text{CH}_2\text{CH}_2\text{N}$ ), 1.67 (br s, 2H,  $\text{NHCH}_2\text{CH}_2\text{CH}_2\text{CH}_2\text{N}$ ), 1.81 (br s, 2H,  $\text{NCH}_2\text{CH}_2\text{CH}_2\text{NH}_2$ ), 2.06 (m, 2H,  $\text{NH}_2\text{CH}_2\text{CH}_2\text{CH}_2\text{NH}$ ), 2.42 (br s, 2H,  $\text{NHCH}_2\text{CH}_2\text{CH}_2\text{CH}_2\text{N}$ ), 2.51 (br s, 2H,  $\text{NCH}_2\text{CH}_2\text{CH}_2\text{NH}_2$ ), 2.89 (br s, 2H,  $\text{NHCH}_2\text{CH}_2\text{CH}_2\text{CH}_2\text{N}$ ), 3.05–3.10 (m, 12H,  $\text{NH}_2\text{CH}_2\text{CH}_2\text{CH}_2\text{NH}$ ,  $\text{NH}_2\text{CH}_2\text{CH}_2\text{CH}_2\text{NH}$ ,  $\text{NCH}_2\text{CH}_2\text{CH}_2\text{NH}_2$ ,  $\text{NCH}_2\text{CO}$ ,  $2 \times \text{NCH}_2\text{CH}_2$ );  $^{13}\text{C}$  NMR (100 MHz,  $\text{CDCl}_3$ ):  $\delta$  14.1, 22.7, 24.5, 24.9, 26.7, 27.1, 27.6, 28.9, 29.3, 29.5, 29.6, 31.9, 38.2, 40.5, 46.2, 46.7, 47.4, 48.1, 53.7, 54.9, 55.5, 170.2; HRMS (ESI-TOF),  $m/z$  calcd for  $\text{C}_{36}\text{H}_{78}\text{N}_5\text{O}$   $[\text{M}+\text{H}]^+$  596.6201; found 596.6220.

### Lipid ST3

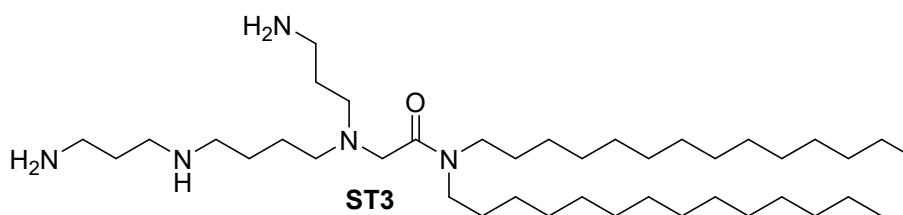

Yield: 79%; IR:  $\nu_{\text{max}}$ ,  $\text{cm}^{-1}$ : 3423, 2922, 2853, 1636, 1551, 1462, 1375, 1314, 1271, 1092, 1013, 753;  $^1\text{H}$  NMR (400 MHz,  $\text{CDCl}_3$ ):  $\delta$  0.86 (t,  $J = 6.6$  Hz, 6H,  $2 \times \text{CH}_3$ ), 1.21 (s, 44H,  $2 \times (\text{CH}_2)_{11}$ ), 1.47–1.57 (m, 8H,  $2 \times \text{NCH}_2\text{CH}_2$ ,  $\text{NHCH}_2\text{CH}_2\text{CH}_2\text{CH}_2\text{N}$ ,  $\text{NHCH}_2\text{CH}_2\text{CH}_2\text{CH}_2\text{N}$ ), 1.71–1.77 (m, 4H,  $\text{NCH}_2\text{CH}_2\text{CH}_2\text{NH}_2$ ,  $\text{NH}_2\text{CH}_2\text{CH}_2\text{CH}_2\text{NH}$ ), 2.45 (t,  $J = 6.6$  Hz, 2H,

NHCH<sub>2</sub>CH<sub>2</sub>CH<sub>2</sub>CH<sub>2</sub>N), 2.51 (t, *J* = 6.3 Hz, 2H, NCH<sub>2</sub>CH<sub>2</sub>CH<sub>2</sub>NH<sub>2</sub>), 2.65 (t, *J* = 6.6 Hz, 2H, NHCH<sub>2</sub>CH<sub>2</sub>CH<sub>2</sub>CH<sub>2</sub>N), 2.77 (t, *J* = 6.6 Hz, 2H, NH<sub>2</sub>CH<sub>2</sub>CH<sub>2</sub>CH<sub>2</sub>NH), 2.85 (t, *J* = 6.5 Hz, 2H, NH<sub>2</sub>CH<sub>2</sub>CH<sub>2</sub>CH<sub>2</sub>NH), 2.94 (t, *J* = 5.8 Hz, 2H, NCH<sub>2</sub>CH<sub>2</sub>CH<sub>2</sub>NH<sub>2</sub>), 3.13–3.22 (m, 6H, NCH<sub>2</sub>CO, 2 × NCH<sub>2</sub>CH<sub>2</sub>); <sup>13</sup>C NMR (100 MHz, CDCl<sub>3</sub>): δ 14.2, 22.6, 24.5, 24.9, 26.0, 26.6, 26.9, 27.0, 27.5, 28.9, 29.3, 29.4, 29.5, 29.6, 31.8, 39.9, 40.2, 46.2, 47.2, 47.6, 48.9, 53.7, 53.8, 170.1; HRMS (ESI-TOF), *m/z* calcd for C<sub>40</sub>H<sub>86</sub>N<sub>5</sub>O [M+H]<sup>+</sup> 652.6826; found 652.6833.

### Lipid ST4

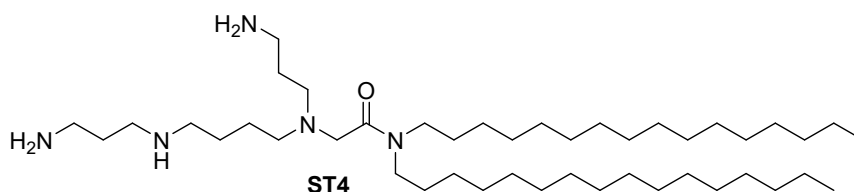

Yield: 77%; IR:  $\nu_{\max}$ , cm<sup>-1</sup>: 3438, 2919, 2851, 1681, 1633, 1465, 1431, 1378, 1273, 1197, 1129, 1021, 831, 800, 753, 720; <sup>1</sup>H NMR (400 MHz, CDCl<sub>3</sub>): δ 0.86 (t, *J* = 6.6 Hz, 6H, 2 × CH<sub>3</sub>), 1.23 (s, 52H, 2 × (CH<sub>2</sub>)<sub>13</sub>), 1.50 (m, 6H, 2 × NCH<sub>2</sub>CH<sub>2</sub>, NHCH<sub>2</sub>CH<sub>2</sub>CH<sub>2</sub>CH<sub>2</sub>N), 1.61 (m, 2H, NHCH<sub>2</sub>CH<sub>2</sub>CH<sub>2</sub>CH<sub>2</sub>N), 1.80 (m, 2H, NCH<sub>2</sub>CH<sub>2</sub>CH<sub>2</sub>NH<sub>2</sub>), 1.95 (m, 2H, NH<sub>2</sub>CH<sub>2</sub>CH<sub>2</sub>CH<sub>2</sub>NH), 2.41 (br s, 2H, NHCH<sub>2</sub>CH<sub>2</sub>CH<sub>2</sub>CH<sub>2</sub>N), 2.52 (br s, 2H, NCH<sub>2</sub>CH<sub>2</sub>CH<sub>2</sub>NH<sub>2</sub>), 2.80 (t, *J* = 6.3 Hz, 2H, NHCH<sub>2</sub>CH<sub>2</sub>CH<sub>2</sub>CH<sub>2</sub>N), 2.99 (t, *J* = 6.3 Hz, 2H, NH<sub>2</sub>CH<sub>2</sub>CH<sub>2</sub>CH<sub>2</sub>NH), 3.04 (t, *J* = 6.0 Hz, 2H, NH<sub>2</sub>CH<sub>2</sub>CH<sub>2</sub>CH<sub>2</sub>NH), 3.10 (br s, 4H, NCH<sub>2</sub>CH<sub>2</sub>CH<sub>2</sub>NH<sub>2</sub>, NCH<sub>2</sub>CH<sub>2</sub>); 33.17–3.24 (m, 4H, NCH<sub>2</sub>CO, NCH<sub>2</sub>CH<sub>2</sub>); <sup>13</sup>C NMR (100 MHz, CDCl<sub>3</sub>): δ 14.1, 22.7, 24.9, 25.3, 25.6, 26.9, 27.1, 27.6, 28.9, 29.3, 29.4, 29.6, 29.7, 31.9, 39.2, 40.6, 46.7, 47.3, 48.2, 53.8, 55.0, 55.4, 170.2; HRMS (ESI-TOF), *m/z* calcd for C<sub>44</sub>H<sub>94</sub>N<sub>5</sub>O [M+H]<sup>+</sup> 708.7453; found 708.7451.

### Lipid ST5

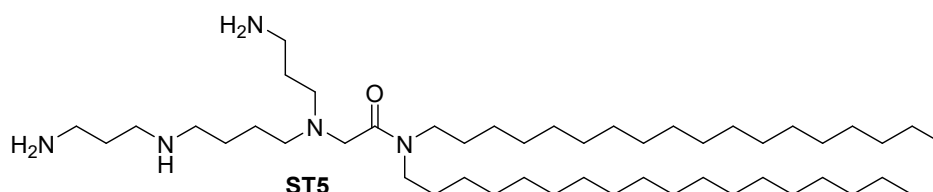

Yield: 86%; IR:  $\nu_{\max}$ , cm<sup>-1</sup>: 3366, 2918, 2850, 1689, 1635, 1561, 1464, 1434, 1375, 1199, 1176, 1128, 1018, 751, 720; <sup>1</sup>H NMR (400 MHz, CDCl<sub>3</sub>): δ 0.83 (t, *J* = 6.7 Hz, 6H, 2 ×

$CH_3$ ), 1.20 (s, 60H,  $2 \times (CH_2)_{15}$ ), 1.44–1.58 (m, 8H,  $2 \times NCH_2CH_2$ ,  $NHCH_2CH_2CH_2CH_2N$ ,  $NHCH_2CH_2CH_2CH_2N$ ), 1.72–1.78 (m, 4H,  $NCH_2CH_2CH_2NH_2$ ,  $NH_2CH_2CH_2CH_2NH$ ), 2.44 (t,  $J = 6.4$  Hz, 2H,  $NHCH_2CH_2CH_2CH_2N$ ), 2.51 (t,  $J = 5.8$  Hz, 2H,  $NCH_2CH_2CH_2NH_2$ ), 2.66 (t,  $J = 6.8$  Hz, 2H,  $NHCH_2CH_2CH_2CH_2N$ ), 2.79 (t,  $J = 6.8$  Hz, 2H,  $NH_2CH_2CH_2CH_2NH$ ), 2.86 (t,  $J = 6.4$  Hz, 2H,  $NH_2CH_2CH_2CH_2NH$ ), 2.96 (t,  $J = 5.9$  Hz, 2H,  $NCH_2CH_2CH_2NH_2$ ), 3.12–3.22 (m, 6H,  $NCH_2CO$ ,  $2 \times NCH_2CH_2$ );  $^{13}C$  NMR (100 MHz,  $CDCl_3$ ):  $\delta$  14.1, 22.6, 24.9, 25.6, 26.4, 26.9, 27.0, 27.6, 28.9, 29.3, 29.4, 29.5, 29.6, 31.8, 40.0, 40.2, 46.3, 47.2, 47.7, 48.7, 53.7, 53.8, 55.8, 170.1; HRMS (ESI-TOF),  $m/z$  calcd for  $C_{48}H_{102}N_5O$   $[M+H]^+$  764.8079; found 764.8094.

### Lipid ST6

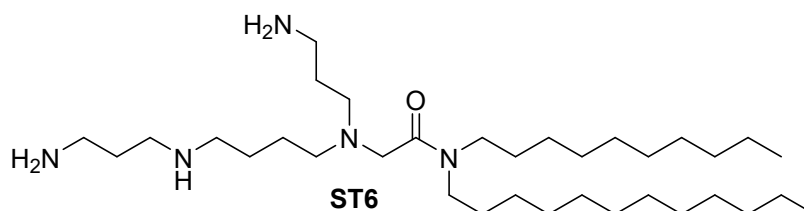

Yield: 81%; IR:  $\nu_{max}$ ,  $cm^{-1}$ : 3383, 2922, 2853, 1634, 1561, 1461, 1377, 1312, 1271, 1111, 1082, 1013, 752, 720;  $^1H$  NMR (400 MHz,  $CDCl_3$ ):  $\delta$  0.83 (t,  $J = 6.6$  Hz, 6H,  $2 \times CH_3$ ), 1.21 (s, 32H,  $(CH_2)_7$  and  $(CH_2)_9$ ), 1.45–1.53 (m, 8H,  $2 \times NCH_2CH_2$ ,  $NHCH_2CH_2CH_2CH_2N$ ,  $NHCH_2CH_2CH_2CH_2N$ ), 1.67–1.77 (m, 4H,  $NCH_2CH_2CH_2NH_2$ ,  $NH_2CH_2CH_2CH_2NH$ ), 2.45 (t,  $J = 6.6$  Hz, 2H,  $NHCH_2CH_2CH_2CH_2N$ ), 2.51 (t,  $J = 6.1$  Hz, 2H,  $NCH_2CH_2CH_2NH_2$ ), 2.63 (t,  $J = 6.6$  Hz, 2H,  $NHCH_2CH_2CH_2CH_2N$ ), 2.75 (t,  $J = 6.7$  Hz, 2H,  $NH_2CH_2CH_2CH_2NH$ ), 2.85 (t,  $J = 6.5$  Hz, 2H,  $NH_2CH_2CH_2CH_2NH$ ), 2.91 (t,  $J = 6.0$  Hz, 2H,  $NCH_2CH_2CH_2NH_2$ ), 3.14–3.23 (m, 6H,  $NCH_2CO$ ,  $2 \times NCH_2CH_2$ );  $^{13}C$  NMR (100 MHz,  $CDCl_3$ ):  $\delta$  14.1, 22.6, 24.7, 24.9, 26.5, 26.8, 26.9, 27.1, 27.6, 28.9, 29.2, 29.3, 29.4, 29.5, 29.6, 30.0, 31.8, 40.0, 40.2, 46.2, 47.2, 47.7, 49.0, 53.5, 53.8, 56.1, 170.0; HRMS (ESI-TOF),  $m/z$  calcd for  $C_{34}H_{74}N_5O$   $[M+H]^+$  568.5888; found 568.5899.

### Lipid ST7

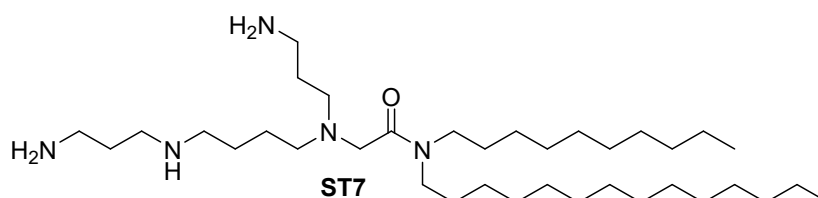

Yield: 78%; IR:  $\nu_{\max}$ ,  $\text{cm}^{-1}$ : 3408, 2919, 2851, 1677, 1634, 1465, 1429, 1376, 1197, 1129, 831, 800, 719;  $^1\text{H}$  NMR (400 MHz,  $\text{CDCl}_3$ ):  $\delta$  0.85 (t,  $J = 6.6$  Hz, 6H,  $2 \times \text{CH}_3$ ), 1.23 (s, 36H,  $(\text{CH}_2)_7$  and  $(\text{CH}_2)_{11}$ ), 1.51 (m, 4H,  $2 \times \text{NCH}_2\text{CH}_2$ ), 1.66 (br s, 2H,  $\text{NHCH}_2\text{CH}_2\text{CH}_2\text{CH}_2\text{N}$ ), 1.85 (br s, 2H,  $\text{NHCH}_2\text{CH}_2\text{CH}_2\text{CH}_2\text{N}$ ), 1.97 (br s, 2H,  $\text{NCH}_2\text{CH}_2\text{CH}_2\text{NH}_2$ ), 2.25 (br s, 2H,  $\text{NH}_2\text{CH}_2\text{CH}_2\text{CH}_2\text{NH}$ ), 2.50 (br s, 2H,  $\text{NHCH}_2\text{CH}_2\text{CH}_2\text{CH}_2\text{N}$ ), 2.56 (br s, 2H,  $\text{NCH}_2\text{CH}_2\text{CH}_2\text{NH}_2$ ), 3.07 (br s, 2H,  $\text{NHCH}_2\text{CH}_2\text{CH}_2\text{CH}_2\text{N}$ ), 3.15 (br s, 2H,  $\text{NH}_2\text{CH}_2\text{CH}_2\text{CH}_2\text{NH}$ ), 3.22–3.28 (m, 10H,  $\text{NH}_2\text{CH}_2\text{CH}_2\text{CH}_2\text{NH}$ ,  $\text{NCH}_2\text{CH}_2\text{CH}_2\text{NH}_2$ ,  $\text{NCH}_2\text{CO}$ ,  $2 \times \text{NCH}_2\text{CH}_2$ );  $^{13}\text{C}$  NMR (100 MHz,  $\text{CDCl}_3$ ):  $\delta$  14.2, 22.6, 24.6, 25.0, 25.3, 26.9, 27.2, 27.8, 29.0, 29.3, 29.4, 29.5, 29.6, 31.9, 38.8, 41.2, 46.7, 46.9, 47.7, 48.2, 53.8, 55.0, 56.0, 170.6; HRMS (ESI-TOF),  $m/z$  calcd for  $\text{C}_{44}\text{H}_{78}\text{N}_5\text{O}$   $[\text{M}+\text{H}]^+$  596.6201; found 596.6219.

### Lipid ST8

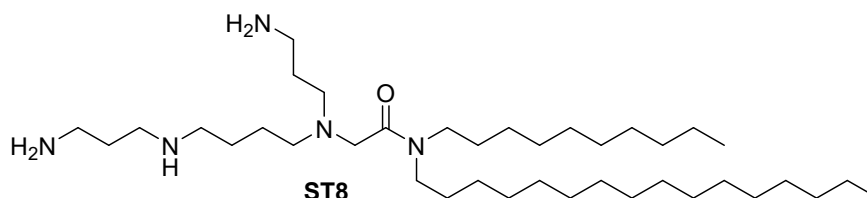

Yield: 77%; IR:  $\nu_{\max}$ ,  $\text{cm}^{-1}$ : 3401, 2922, 2853, 1679, 1638, 1461, 1374, 1198, 1171, 1126, 1014, 799, 719;  $^1\text{H}$  NMR (400 MHz,  $\text{CDCl}_3$ ):  $\delta$  0.85 (t,  $J = 6.6$  Hz, 6H,  $2 \times \text{CH}_3$ ), 1.22 (s, 40H,  $(\text{CH}_2)_7$  and  $(\text{CH}_2)_{13}$ ), 1.51 (m, 6H,  $2 \times \text{NCH}_2\text{CH}_2$ ,  $\text{NHCH}_2\text{CH}_2\text{CH}_2\text{CH}_2\text{N}$ ), 1.65 (m, 2H,  $\text{NHCH}_2\text{CH}_2\text{CH}_2\text{CH}_2\text{N}$ ), 1.76–1.784 (m, 4H,  $\text{NCH}_2\text{CH}_2\text{CH}_2\text{NH}_2$ ,  $\text{NH}_2\text{CH}_2\text{CH}_2\text{CH}_2\text{NH}$ ), 2.48 (t,  $J = 7.3$  Hz, 2H,  $\text{NHCH}_2\text{CH}_2\text{CH}_2\text{CH}_2\text{N}$ ), 2.55 (t,  $J = 6.0$  Hz, 2H,  $\text{NCH}_2\text{CH}_2\text{CH}_2\text{NH}_2$ ), 2.74 (t,  $J = 6.6$  Hz, 2H,  $\text{NHCH}_2\text{CH}_2\text{CH}_2\text{CH}_2\text{N}$ ), 2.88 (m, 4H,  $\text{NH}_2\text{CH}_2\text{CH}_2\text{CH}_2\text{NH}$ ,  $\text{NH}_2\text{CH}_2\text{CH}_2\text{CH}_2\text{NH}$ ), 2.90 (t,  $J = 5.7$  Hz, 2H,  $\text{NCH}_2\text{CH}_2\text{CH}_2\text{NH}_2$ ), 3.15–3.25 (m, 6H,  $\text{NCH}_2\text{CO}$ ,  $2 \times \text{NCH}_2\text{CH}_2$ );  $^{13}\text{C}$  NMR (100 MHz,  $\text{CDCl}_3$ ):  $\delta$  14.1, 22.6, 25.0, 26.1, 26.5, 26.9, 27.1, 27.9, 29.0, 29.3, 29.4, 29.5, 29.6, 31.9, 40.3, 40.5, 46.4, 47.4, 48.0, 48.7, 50.6, 53.9, 54.0, 56.0, 170.2; HRMS (ESI-TOF),  $m/z$  calcd for  $\text{C}_{38}\text{H}_{82}\text{N}_5\text{O}$   $[\text{M}+\text{H}]^+$  624.6514; found 624.6538.

**Lipid ST9**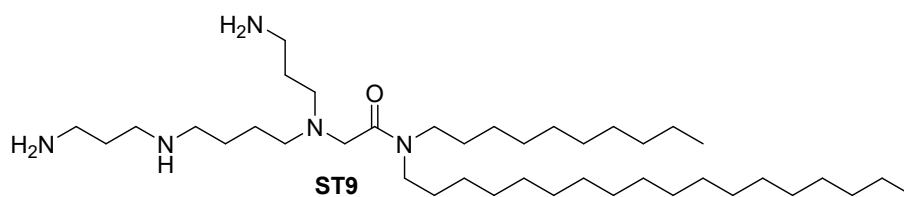

Yield: 76%; IR:  $\nu_{\max}$ ,  $\text{cm}^{-1}$ : 3395, 2921, 2852, 1637, 1554, 1461, 1375, 1314, 1108, 1018, 720;  $^1\text{H}$  NMR (400 MHz,  $\text{CDCl}_3$ ):  $\delta$  0.83 (t,  $J = 6.6$  Hz, 6H,  $2 \times \text{CH}_3$ ), 1.21 (s, 44H,  $(\text{CH}_2)_7$  and  $(\text{CH}_2)_{15}$ ), 1.45–1.56 (m, 8H,  $2 \times \text{NCH}_2\text{CH}_2$ ,  $\text{NHCH}_2\text{CH}_2\text{CH}_2\text{CH}_2\text{N}$ ,  $\text{NHCH}_2\text{CH}_2\text{CH}_2\text{CH}_2\text{N}$ ), 1.74 (m, 4H,  $\text{NCH}_2\text{CH}_2\text{CH}_2\text{NH}_2$ ,  $\text{NH}_2\text{CH}_2\text{CH}_2\text{CH}_2\text{NH}$ ), 2.45 (t,  $J = 6.7$  Hz, 2H,  $\text{NHCH}_2\text{CH}_2\text{CH}_2\text{CH}_2\text{N}$ ), 2.52 (t,  $J = 6.0$  Hz, 2H,  $\text{NCH}_2\text{CH}_2\text{CH}_2\text{NH}_2$ ), 2.66 (t,  $J = 6.5$  Hz, 2H,  $\text{NHCH}_2\text{CH}_2\text{CH}_2\text{CH}_2\text{N}$ ), 2.78 (t,  $J = 6.6$  Hz, 2H,  $\text{NH}_2\text{CH}_2\text{CH}_2\text{CH}_2\text{NH}$ ), 2.85 (t,  $J = 6.3$  Hz, 2H,  $\text{NH}_2\text{CH}_2\text{CH}_2\text{CH}_2\text{NH}$ ), 2.92 (t,  $J = 5.8$  Hz, 2H,  $\text{NCH}_2\text{CH}_2\text{CH}_2\text{NH}_2$ ), 3.13–3.23 (m, 6H,  $\text{NCH}_2\text{CO}$ ,  $2 \times \text{NCH}_2\text{CH}_2$ );  $^{13}\text{C}$  NMR (100 MHz,  $\text{CDCl}_3$ ):  $\delta$  14.0, 22.6, 24.9, 26.4, 26.7, 26.9, 27.1, 27.6, 28.9, 29.3, 29.4, 29.5, 29.6, 29.9, 31.8, 40.1, 40.2, 46.2, 47.2, 47.8, 48.9, 53.5, 53.9, 56.1, 170.1; HRMS (ESI-TOF),  $m/z$  calcd for  $\text{C}_{40}\text{H}_{86}\text{N}_5\text{O}$   $[\text{M}+\text{H}]^+$  652.6826; found 652.6835.

**Lipid ST10**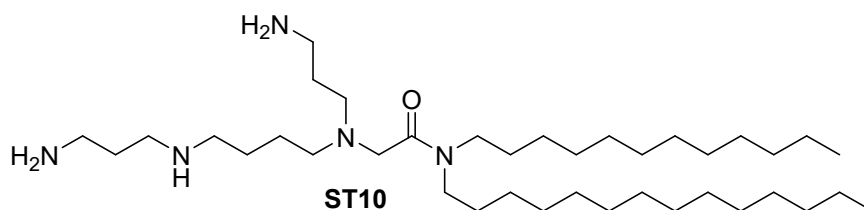

Yield: 72%; IR:  $\nu_{\max}$ ,  $\text{cm}^{-1}$ : 3419, 2921, 2852, 1637, 1551, 1461, 1374, 1311, 1086, 720;  $^1\text{H}$  NMR (400 MHz,  $\text{CDCl}_3$ ):  $\delta$  0.85 (t,  $J = 7.0$  Hz, 6H,  $2 \times \text{CH}_3$ ), 1.21 (s, 40H,  $(\text{CH}_2)_9$  and  $(\text{CH}_2)_{11}$ ), 1.48 (m, 6H,  $2 \times \text{NCH}_2\text{CH}_2$ ,  $\text{NHCH}_2\text{CH}_2\text{CH}_2\text{CH}_2\text{N}$ ), 1.63 (m, 2H,  $\text{NHCH}_2\text{CH}_2\text{CH}_2\text{CH}_2\text{N}$ ), 1.76–1.82 (m, 4H,  $\text{NCH}_2\text{CH}_2\text{CH}_2\text{NH}_2$ ,  $\text{NH}_2\text{CH}_2\text{CH}_2\text{CH}_2\text{NH}$ ), 2.47 (t,  $J = 6.7$  Hz, 2H,  $\text{NHCH}_2\text{CH}_2\text{CH}_2\text{CH}_2\text{N}$ ), 2.54 (t,  $J = 6.0$  Hz, 2H,  $\text{NCH}_2\text{CH}_2\text{CH}_2\text{NH}_2$ ), 2.72 (t,  $J = 6.5$  Hz, 2H,  $\text{NHCH}_2\text{CH}_2\text{CH}_2\text{CH}_2\text{N}$ ), 2.85 (t,  $J = 6.6$  Hz, 2H,  $\text{NH}_2\text{CH}_2\text{CH}_2\text{CH}_2\text{NH}$ ), 2.90 (t,  $J = 6.3$  Hz, 2H,  $\text{NH}_2\text{CH}_2\text{CH}_2\text{CH}_2\text{NH}$ ), 2.99 (t,  $J = 5.7$  Hz, 2H,  $\text{NCH}_2\text{CH}_2\text{CH}_2\text{NH}_2$ ) 3.14–3.24 (m, 6H,  $\text{NCH}_2\text{CO}$ ,  $2 \times \text{NCH}_2\text{CH}_2$ );  $^{13}\text{C}$  NMR (100 MHz,  $\text{CDCl}_3$ ):  $\delta$  14.1, 22.6, 25.0, 25.9, 26.4, 26.9, 27.1, 27.7, 29.0, 29.3, 29.4, 29.5, 29.6, 31.9, 40.3, 40.5, 46.4, 47.3,



48.0, 48.7, 53.9, 56.0, 170.2; HRMS (ESI-TOF),  $m/z$  calcd for  $C_{38}H_{82}N_5O$   $[M+H]^+$  624.6514; found 624.6525.

### Lipid ST11

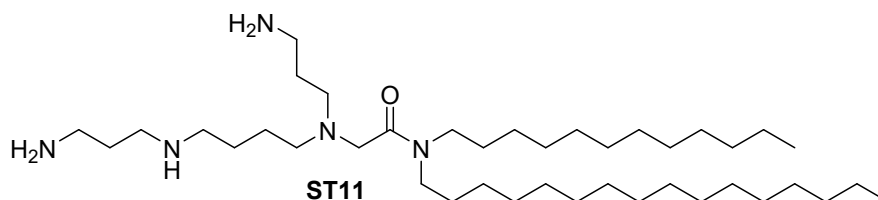

Yield: 80%; IR:  $\nu_{\max}$ ,  $\text{cm}^{-1}$ : 3419, 2921, 2852, 1638, 1551, 1461, 1374, 1311, 1248, 1086, 1011, 721;  $^1\text{H}$  NMR (400 MHz,  $\text{CDCl}_3$ ):  $\delta$  0.85 (t,  $J = 6.6$  Hz, 6H,  $2 \times \text{CH}_3$ ), 1.21 (s, 44H,  $(\text{CH}_2)_9$  and  $(\text{CH}_2)_{13}$ ), 1.51 (m, 6H,  $2 \times \text{NCH}_2\text{CH}_2$ ,  $\text{NHCH}_2\text{CH}_2\text{CH}_2\text{CH}_2\text{N}$ ), 1.59 (m, 2H,  $\text{NHCH}_2\text{CH}_2\text{CH}_2\text{CH}_2\text{N}$ ), 1.70–1.77 (m, 4H,  $\text{NCH}_2\text{CH}_2\text{CH}_2\text{NH}_2$ ,  $\text{NH}_2\text{CH}_2\text{CH}_2\text{CH}_2\text{NH}$ ), 2.48 (t,  $J = 7.1$  Hz, 2H,  $\text{NHCH}_2\text{CH}_2\text{CH}_2\text{CH}_2\text{N}$ ), 2.54 (t,  $J = 6.3$  Hz, 2H,  $\text{NCH}_2\text{CH}_2\text{CH}_2\text{NH}_2$ ), 2.68 (t,  $J = 6.6$  Hz, 2H,  $\text{NHCH}_2\text{CH}_2\text{CH}_2\text{CH}_2\text{N}$ ), 2.79 (t,  $J = 6.7$  Hz, 2H,  $\text{NH}_2\text{CH}_2\text{CH}_2\text{CH}_2\text{NH}$ ), 2.85 (t,  $J = 6.5$  Hz, 2H,  $\text{NH}_2\text{CH}_2\text{CH}_2\text{CH}_2\text{NH}$ ), 2.91 (t,  $J = 6.1$  Hz, 2H,  $\text{NCH}_2\text{CH}_2\text{CH}_2\text{NH}_2$ ), 3.17–3.25 (m, 6H,  $\text{NCH}_2\text{CO}$ ,  $2 \times \text{NCH}_2\text{CH}_2$ );  $^{13}\text{C}$  NMR (100 MHz,  $\text{CDCl}_3$ ):  $\delta$  14.1, 22.6, 24.9, 26.8, 26.9, 27.1, 27.2, 27.6, 29.0, 29.3, 29.4, 29.5, 29.6, 29.7, 31.9, 40.4, 40.5, 46.2, 47.3, 48.0, 49.0, 53.5, 54.0, 56.3, 170.2; HRMS (ESI-TOF),  $m/z$  calcd for  $C_{40}H_{86}N_5O$   $[M+H]^+$  652.6827; found 652.6830.

### Lipid ST12

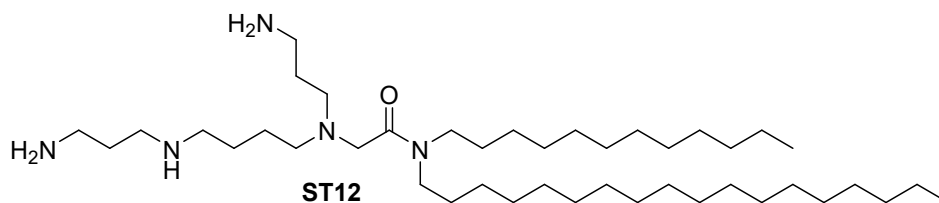

Yield: 77%; IR:  $\nu_{\max}$ ,  $\text{cm}^{-1}$ : 3393, 2922, 2853, 1637, 1554, 1460, 1372, 1294, 1113, 784, 719;  $^1\text{H}$  NMR (400 MHz,  $\text{CDCl}_3$ ):  $\delta$  0.85 (t,  $J = 6.7$  Hz, 6H,  $2 \times \text{CH}_3$ ), 1.23 (s, 48H,  $(\text{CH}_2)_9$  and  $(\text{CH}_2)_{15}$ ), 1.50 (m, 6H,  $2 \times \text{NCH}_2\text{CH}_2$ ,  $\text{NHCH}_2\text{CH}_2\text{CH}_2\text{CH}_2\text{N}$ ), 1.60 (m, 2H,  $\text{NHCH}_2\text{CH}_2\text{CH}_2\text{CH}_2\text{N}$ ), 1.74–1.81 (m, 4H,  $\text{NCH}_2\text{CH}_2\text{CH}_2\text{NH}_2$ ,  $\text{NH}_2\text{CH}_2\text{CH}_2\text{CH}_2\text{NH}$ ), 2.48 (t,  $J = 6.8$  Hz, 2H,  $\text{NHCH}_2\text{CH}_2\text{CH}_2\text{CH}_2\text{N}$ ), 2.54 (t,  $J = 6.1$  Hz, 2H,  $\text{NCH}_2\text{CH}_2\text{CH}_2\text{NH}_2$ ), 2.70 (t,  $J = 6.6$  Hz, 2H,  $\text{NHCH}_2\text{CH}_2\text{CH}_2\text{CH}_2\text{N}$ ), 2.82 (t,  $J = 6.7$  Hz, 2H,  $\text{NH}_2\text{CH}_2\text{CH}_2\text{CH}_2\text{NH}$ ),

2.89 (t,  $J = 6.4$  Hz, 2H,  $\text{NH}_2\text{CH}_2\text{CH}_2\text{CH}_2\text{NH}$ ), 2.96 (t,  $J = 5.9$  Hz, 2H,  $\text{NCH}_2\text{CH}_2\text{CH}_2\text{NH}_2$ ), 3.16–3.25 (m, 6H,  $\text{NCH}_2\text{CO}$ ,  $2 \times \text{NCH}_2\text{CH}_2$ );  $^{13}\text{C}$  NMR (100 MHz,  $\text{CDCl}_3$ ):  $\delta$  14.1, 22.7, 25.0, 26.6, 26.7, 26.9, 27.1, 27.7, 29.0, 29.3, 29.4, 29.5, 29.6, 29.7, 31.9, 40.3, 40.5, 46.3, 47.3, 48.0, 48.9, 53.6, 54.0, 56.2, 170.2; HRMS (ESI-TOF),  $m/z$  calcd for  $\text{C}_{42}\text{H}_{90}\text{N}_5\text{O}$   $[\text{M}+\text{H}]^+$  680.7140; found 680.7153.

### Lipid ST13

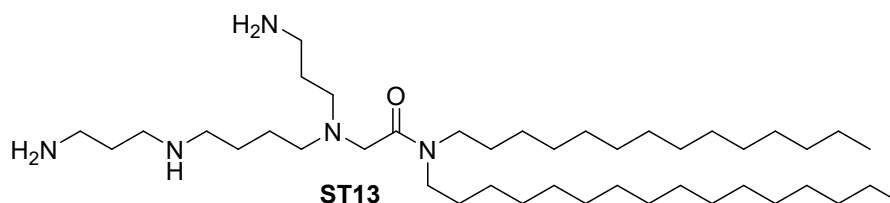

Yield: 89%; IR:  $\nu_{\text{max}}$ ,  $\text{cm}^{-1}$ : 3393, 2921, 2852, 1645, 1461, 1374, 1269, 1117, 753, 722;  $^1\text{H}$  NMR (400 MHz,  $\text{CDCl}_3$ ):  $\delta$  0.85 (t,  $J = 6.6$  Hz, 6H,  $2 \times \text{CH}_3$ ), 1.22 (s, 48H,  $(\text{CH}_2)_{11}$  and  $(\text{CH}_2)_{13}$ ), 1.51 (m, 6H,  $2 \times \text{NCH}_2\text{CH}_2$ ,  $\text{NHCH}_2\text{CH}_2\text{CH}_2\text{CH}_2\text{N}$ ), 1.63 (m, 2H,  $\text{NHCH}_2\text{CH}_2\text{CH}_2\text{CH}_2\text{N}$ ), 1.75–1.84 (m, 4H,  $\text{NCH}_2\text{CH}_2\text{CH}_2\text{NH}_2$ ,  $\text{NH}_2\text{CH}_2\text{CH}_2\text{CH}_2\text{NH}$ ), 2.48 (t,  $J = 6.7$  Hz, 2H,  $\text{NHCH}_2\text{CH}_2\text{CH}_2\text{CH}_2\text{N}$ ), 2.54 (t,  $J = 6.1$  Hz, 2H,  $\text{NCH}_2\text{CH}_2\text{CH}_2\text{NH}_2$ ), 2.72 (t,  $J = 6.7$  Hz, 2H,  $\text{NHCH}_2\text{CH}_2\text{CH}_2\text{CH}_2\text{N}$ ), 2.85 (t,  $J = 6.7$  Hz, 2H,  $\text{NH}_2\text{CH}_2\text{CH}_2\text{CH}_2\text{NH}$ ), 2.90 (t,  $J = 6.4$  Hz, 2H,  $\text{NH}_2\text{CH}_2\text{CH}_2\text{CH}_2\text{NH}$ ), 2.98 (t,  $J = 5.8$  Hz, 2H,  $\text{NCH}_2\text{CH}_2\text{CH}_2\text{NH}_2$ ), 3.15–3.24 (m, 6H,  $\text{NCH}_2\text{CO}$ ,  $2 \times \text{NCH}_2\text{CH}_2$ );  $^{13}\text{C}$  NMR (100 MHz,  $\text{CDCl}_3$ ):  $\delta$  14.1, 22.6, 25.0, 26.2, 26.5, 26.9, 27.1, 27.7, 29.0, 29.3, 29.4, 29.5, 29.6, 29.7, 31.9, 40.2, 40.5, 46.4, 47.3, 47.9, 48.8, 53.9, 54.0, 56.1, 170.2; HRMS (ESI-TOF),  $m/z$  calcd for  $\text{C}_{42}\text{H}_{90}\text{N}_5\text{O}$   $[\text{M}+\text{H}]^+$  680.7140; found 680.7133.

### Lipid ST14

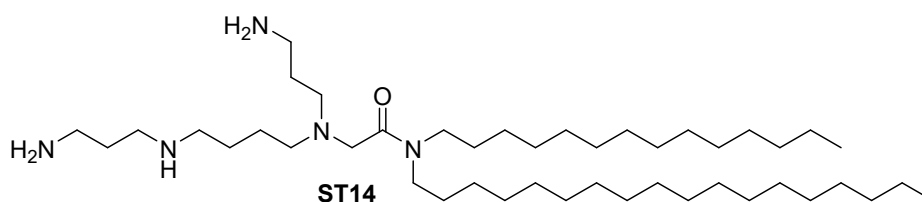

Yield: 79%; IR:  $\nu_{\text{max}}$ ,  $\text{cm}^{-1}$ : 3416, 2922, 2853, 1633, 1556, 1460, 1373, 1274, 1112, 1074, 1016, 751, 725;  $^1\text{H}$  NMR (400 MHz,  $\text{CDCl}_3$ ):  $\delta$  0.84 (t,  $J = 6.7$  Hz, 6H,  $2 \times \text{CH}_3$ ), 1.22 (s, 52H,  $(\text{CH}_2)_{11}$  and  $(\text{CH}_2)_{15}$ ), 1.50 (m, 6H,  $2 \times \text{NCH}_2\text{CH}_2$ ,  $\text{NHCH}_2\text{CH}_2\text{CH}_2\text{CH}_2\text{N}$ ), 1.61 (m, 2H,

NHCH<sub>2</sub>CH<sub>2</sub>CH<sub>2</sub>CH<sub>2</sub>N), 1.71–1.78 (m, 4H, NCH<sub>2</sub>CH<sub>2</sub>CH<sub>2</sub>NH<sub>2</sub>, NH<sub>2</sub>CH<sub>2</sub>CH<sub>2</sub>CH<sub>2</sub>NH), 2.49 (t, *J* = 5.5 Hz, 2H, NHCH<sub>2</sub>CH<sub>2</sub>CH<sub>2</sub>CH<sub>2</sub>N), 2.55 (t, *J* = 6.4 Hz, 2H, NCH<sub>2</sub>CH<sub>2</sub>CH<sub>2</sub>NH<sub>2</sub>), 2.72 (t, *J* = 6.6 Hz, 2H, NHCH<sub>2</sub>CH<sub>2</sub>CH<sub>2</sub>CH<sub>2</sub>N), 2.83 (m, 4H, NH<sub>2</sub>CH<sub>2</sub>CH<sub>2</sub>CH<sub>2</sub>NH, NH<sub>2</sub>CH<sub>2</sub>CH<sub>2</sub>CH<sub>2</sub>NH), 2.91 (t, *J* = 5.8 Hz, 2H, NCH<sub>2</sub>CH<sub>2</sub>CH<sub>2</sub>NH<sub>2</sub>), 3.17–3.24 (m, 6H, NCH<sub>2</sub>CO, 2 × NCH<sub>2</sub>CH<sub>2</sub>); <sup>13</sup>C NMR (100 MHz, CDCl<sub>3</sub>): δ 14.1, 22.6, 25.0, 26.8, 26.9, 27.1, 27.2, 27.7, 29.0, 29.3, 29.4, 29.5, 29.7, 31.9, 40.4, 46.3, 47.3, 48.1, 48.8, 53.5, 54.0, 56.2, 170.2; HRMS (ESI-TOF), *m/z* calcd for C<sub>44</sub>H<sub>94</sub>N<sub>5</sub>O [M+H]<sup>+</sup> 708.7453; found 708.7451.

### Lipid ST15

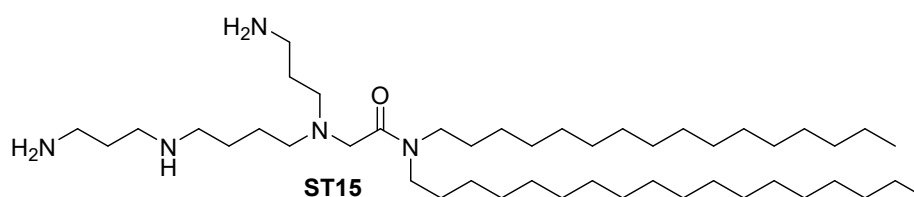

Yield: 79%; IR:  $\nu_{\max}$ , cm<sup>-1</sup>: 3382, 2920, 2852, 1636, 1541, 1559, 1516, 1461, 1374, 1317, 1272, 1105, 752, 720; <sup>1</sup>H NMR (400 MHz, CDCl<sub>3</sub>): δ 0.85 (t, *J* = 6.7 Hz, 6H, 2 × CH<sub>3</sub>), 1.22 (s, 56H, (CH<sub>2</sub>)<sub>13</sub> and (CH<sub>2</sub>)<sub>15</sub>), 1.51 (m, 6H, 2 × NCH<sub>2</sub>CH<sub>2</sub>, NHCH<sub>2</sub>CH<sub>2</sub>CH<sub>2</sub>CH<sub>2</sub>N), 1.62 (m, 2H, NHCH<sub>2</sub>CH<sub>2</sub>CH<sub>2</sub>CH<sub>2</sub>N), 1.75–1.82 (m, 4H, NCH<sub>2</sub>CH<sub>2</sub>CH<sub>2</sub>NH<sub>2</sub>, NH<sub>2</sub>CH<sub>2</sub>CH<sub>2</sub>CH<sub>2</sub>NH), 2.48 (t, *J* = 6.8 Hz, 2H, NHCH<sub>2</sub>CH<sub>2</sub>CH<sub>2</sub>CH<sub>2</sub>N), 2.54 (t, *J* = 6.1 Hz, 2H, NCH<sub>2</sub>CH<sub>2</sub>CH<sub>2</sub>NH<sub>2</sub>), 2.72 (t, *J* = 6.6 Hz, 2H, NHCH<sub>2</sub>CH<sub>2</sub>CH<sub>2</sub>CH<sub>2</sub>N), 2.84 (t, *J* = 6.6 Hz, 2H, NH<sub>2</sub>CH<sub>2</sub>CH<sub>2</sub>CH<sub>2</sub>NH), 2.90 (t, *J* = 6.4 Hz, 2H, NH<sub>2</sub>CH<sub>2</sub>CH<sub>2</sub>CH<sub>2</sub>NH), 2.98 (t, *J* = 5.8 Hz, 2H, NCH<sub>2</sub>CH<sub>2</sub>CH<sub>2</sub>NH<sub>2</sub>), 3.15–3.23 (m, 6H, NCH<sub>2</sub>CO, 2 × NCH<sub>2</sub>CH<sub>2</sub>); <sup>13</sup>C NMR (100 MHz, CDCl<sub>3</sub>): δ 14.1, 22.6, 25.0, 26.2, 26.5, 26.9, 27.1, 27.7, 29.0, 29.3, 29.4, 29.6, 29.7, 31.9, 40.3, 40.5, 46.4, 47.3, 48.0, 48.8, 53.9, 54.0, 56.1, 170.2; HRMS (ESI-TOF), *m/z* calcd for C<sub>46</sub>H<sub>98</sub>N<sub>5</sub>O [M+H]<sup>+</sup> 736.7766; found 736.7780.

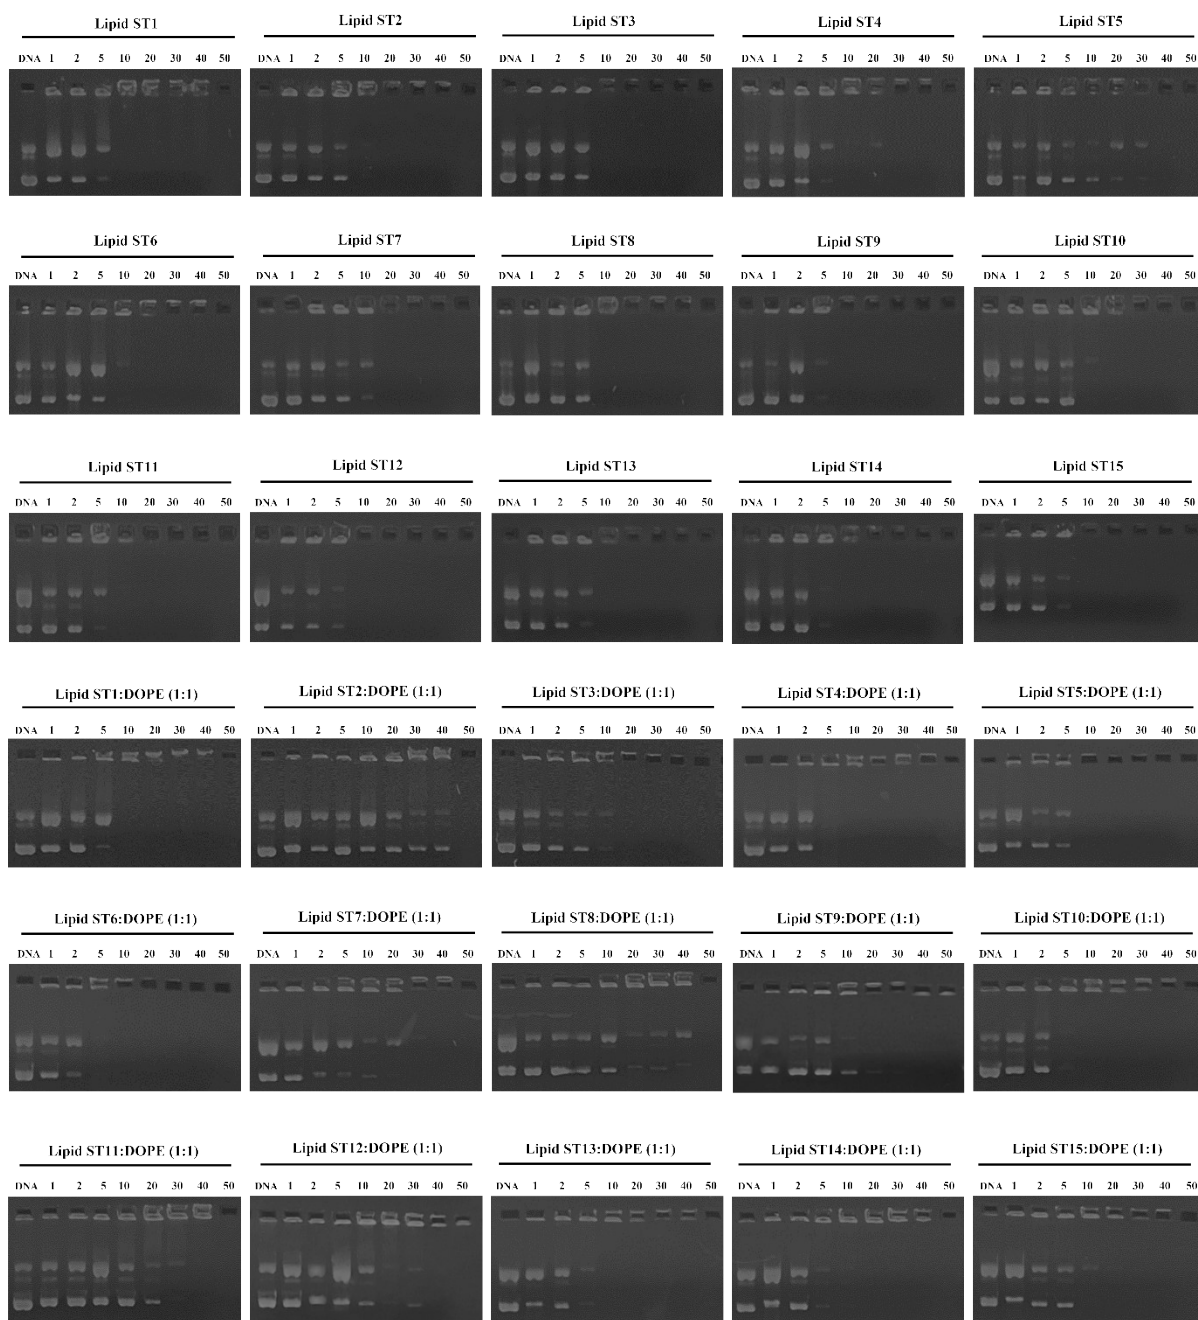

**Fig. S1** Gel electrophoresis of cationic liposome/DNA complexes at N/P ratios of 0.5, 1, 2.5, 5, 10, 15, 20, and 25 with the final DNA concentration of 0.1  $\mu\text{g}/\text{well}$ . The liposomes were formulated using cationic lipid alone and with the combination of DOPE (1:1 weight ratio).

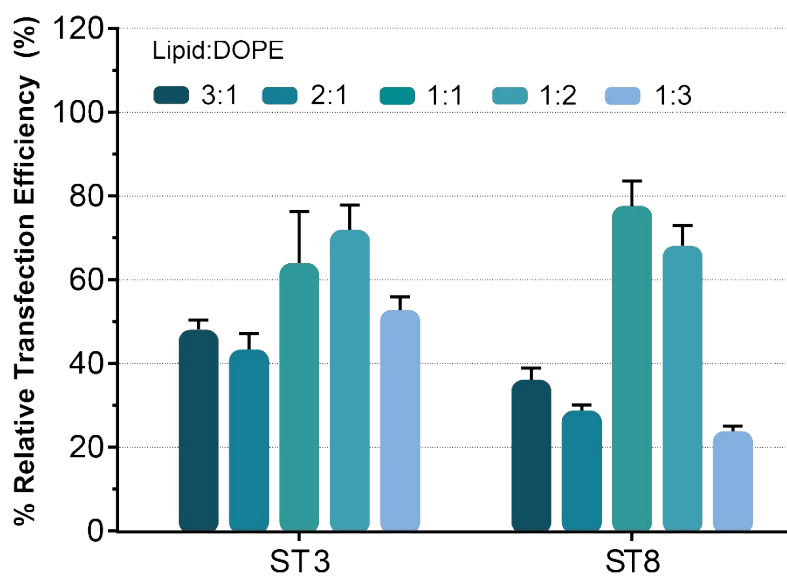

**Fig. S2** Transfection efficiency of cationic lipids **ST3** and **ST8** with DOPE at various weight ratios against HEK293T. The relative transfection efficiency of the lipids was compared with that of L3K, which was calculated as 100% (data not shown). Each value represents the mean  $\pm$  S.D. of three measurements.

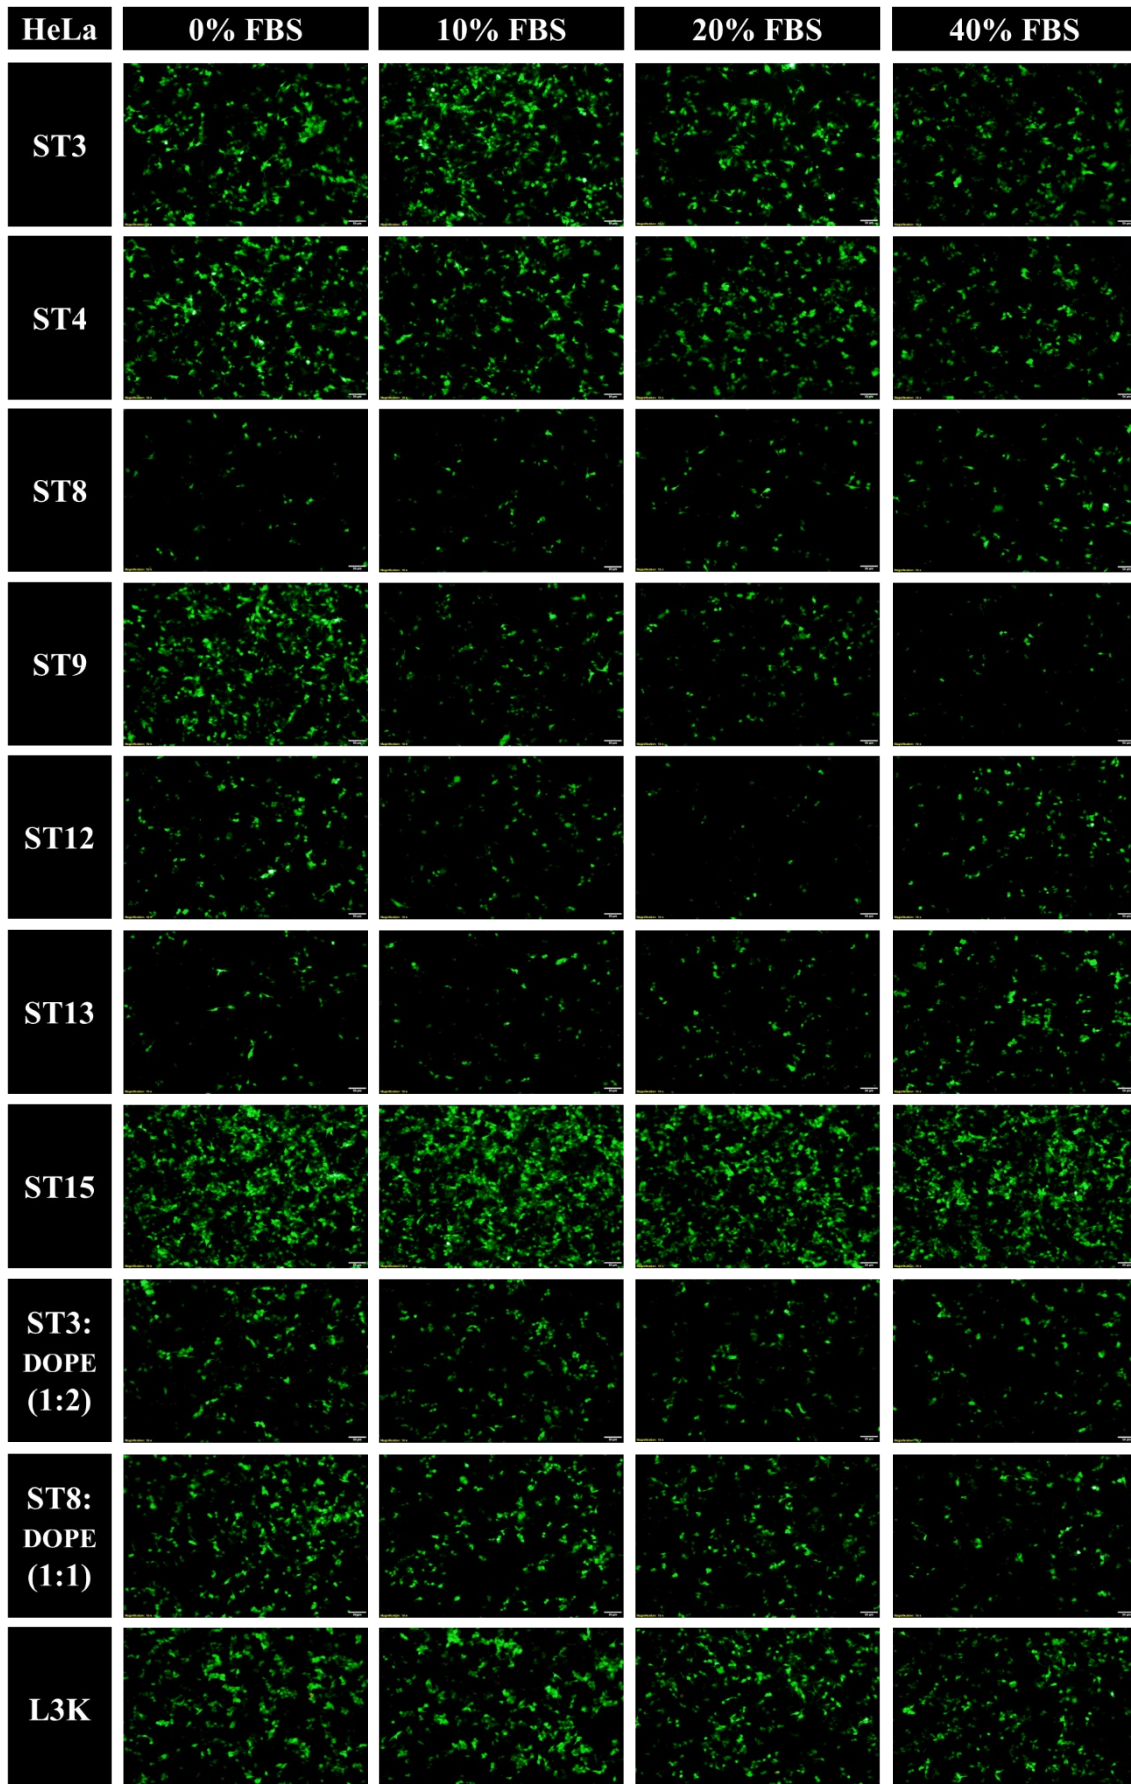

**Fig. S3** Green fluorescent protein expression in HeLa cells transfected with lipoplexes of selected lipids under serum-free and in the presence of 10%, 20% and 40% serum medium.

The fluorescence microscope images were captured 48 h post-transfection under 10X magnification. Lipofectamine3000 (L3K) served as positive control. The scale bar is 50  $\mu\text{m}$ .

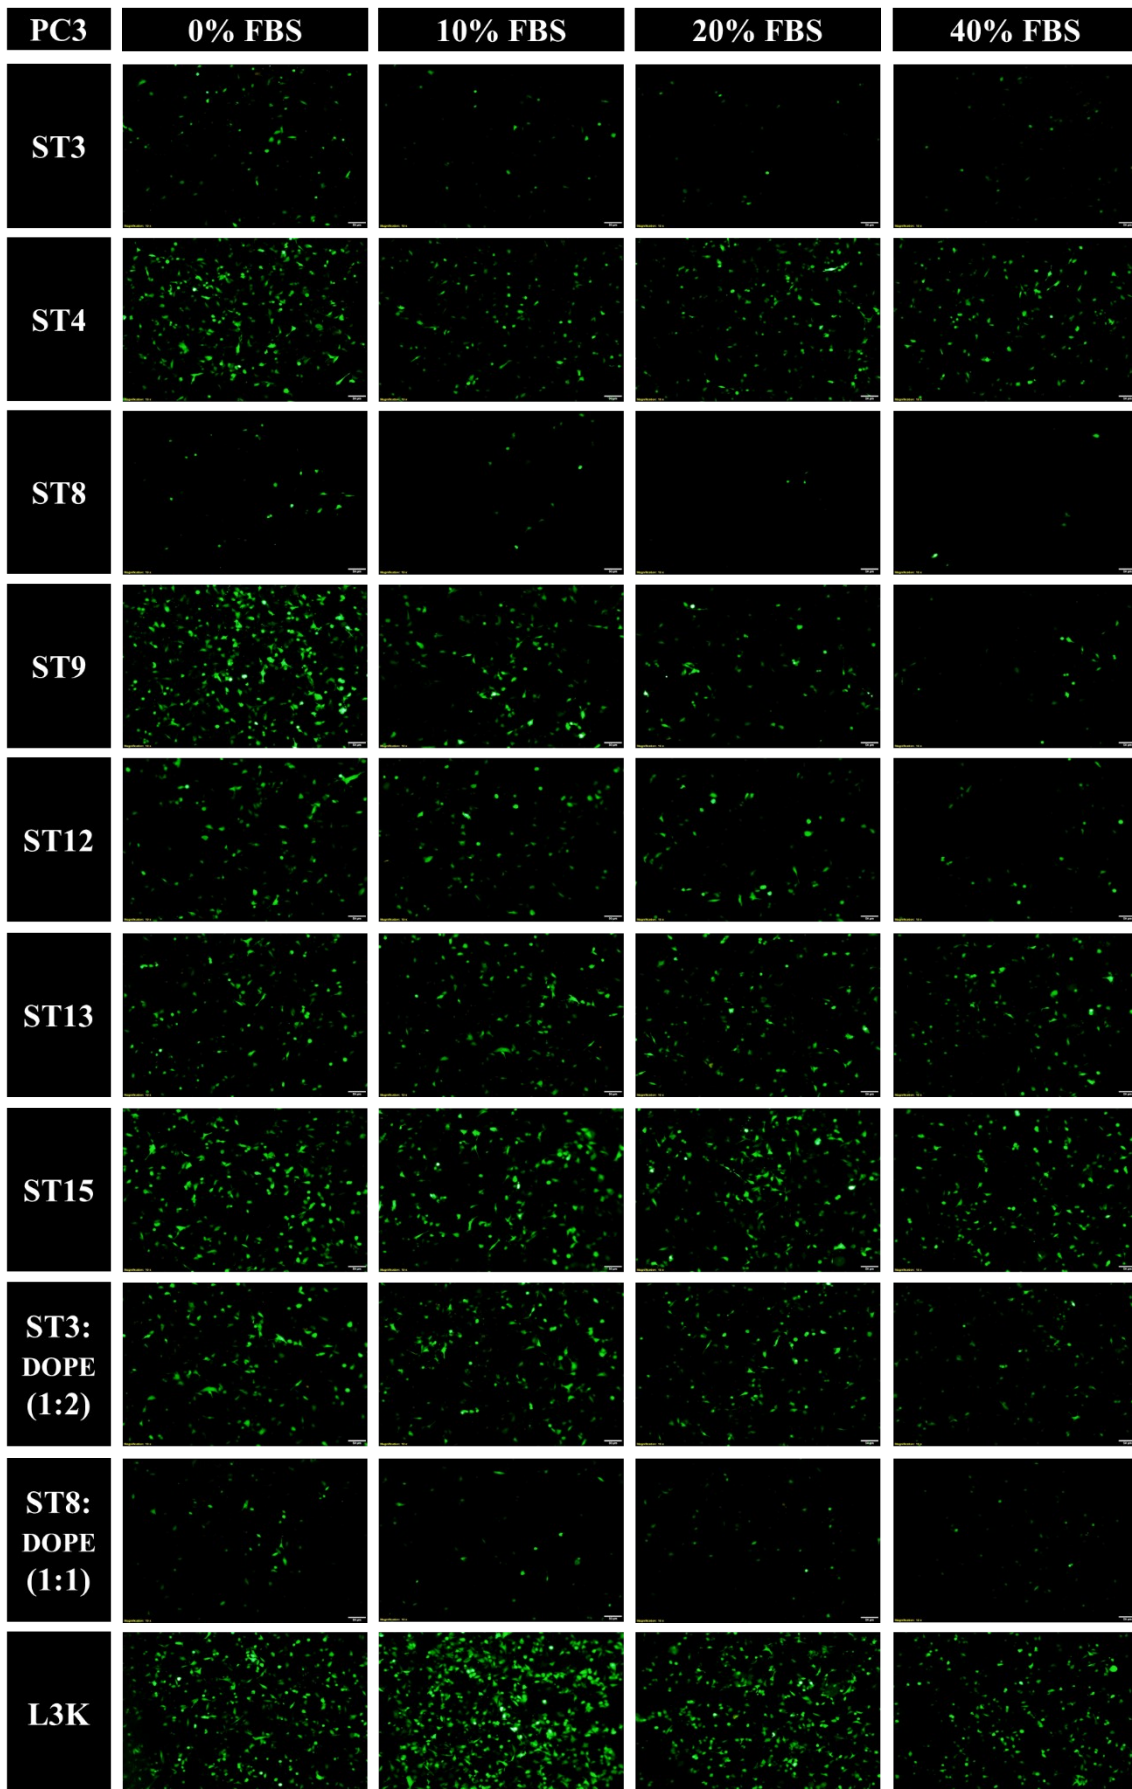

**Fig. S4** Green fluorescent protein expression in PC3 cells transfected with lipoplexes of selected lipids under serum-free and in the presence of 10%, 20% and 40% serum medium. The fluorescence microscope images were captured 48 h post-transfection under 10X magnification. Lipofectamine3000 (L3K) served as positive control. The scale bar is 50  $\mu\text{m}$ .



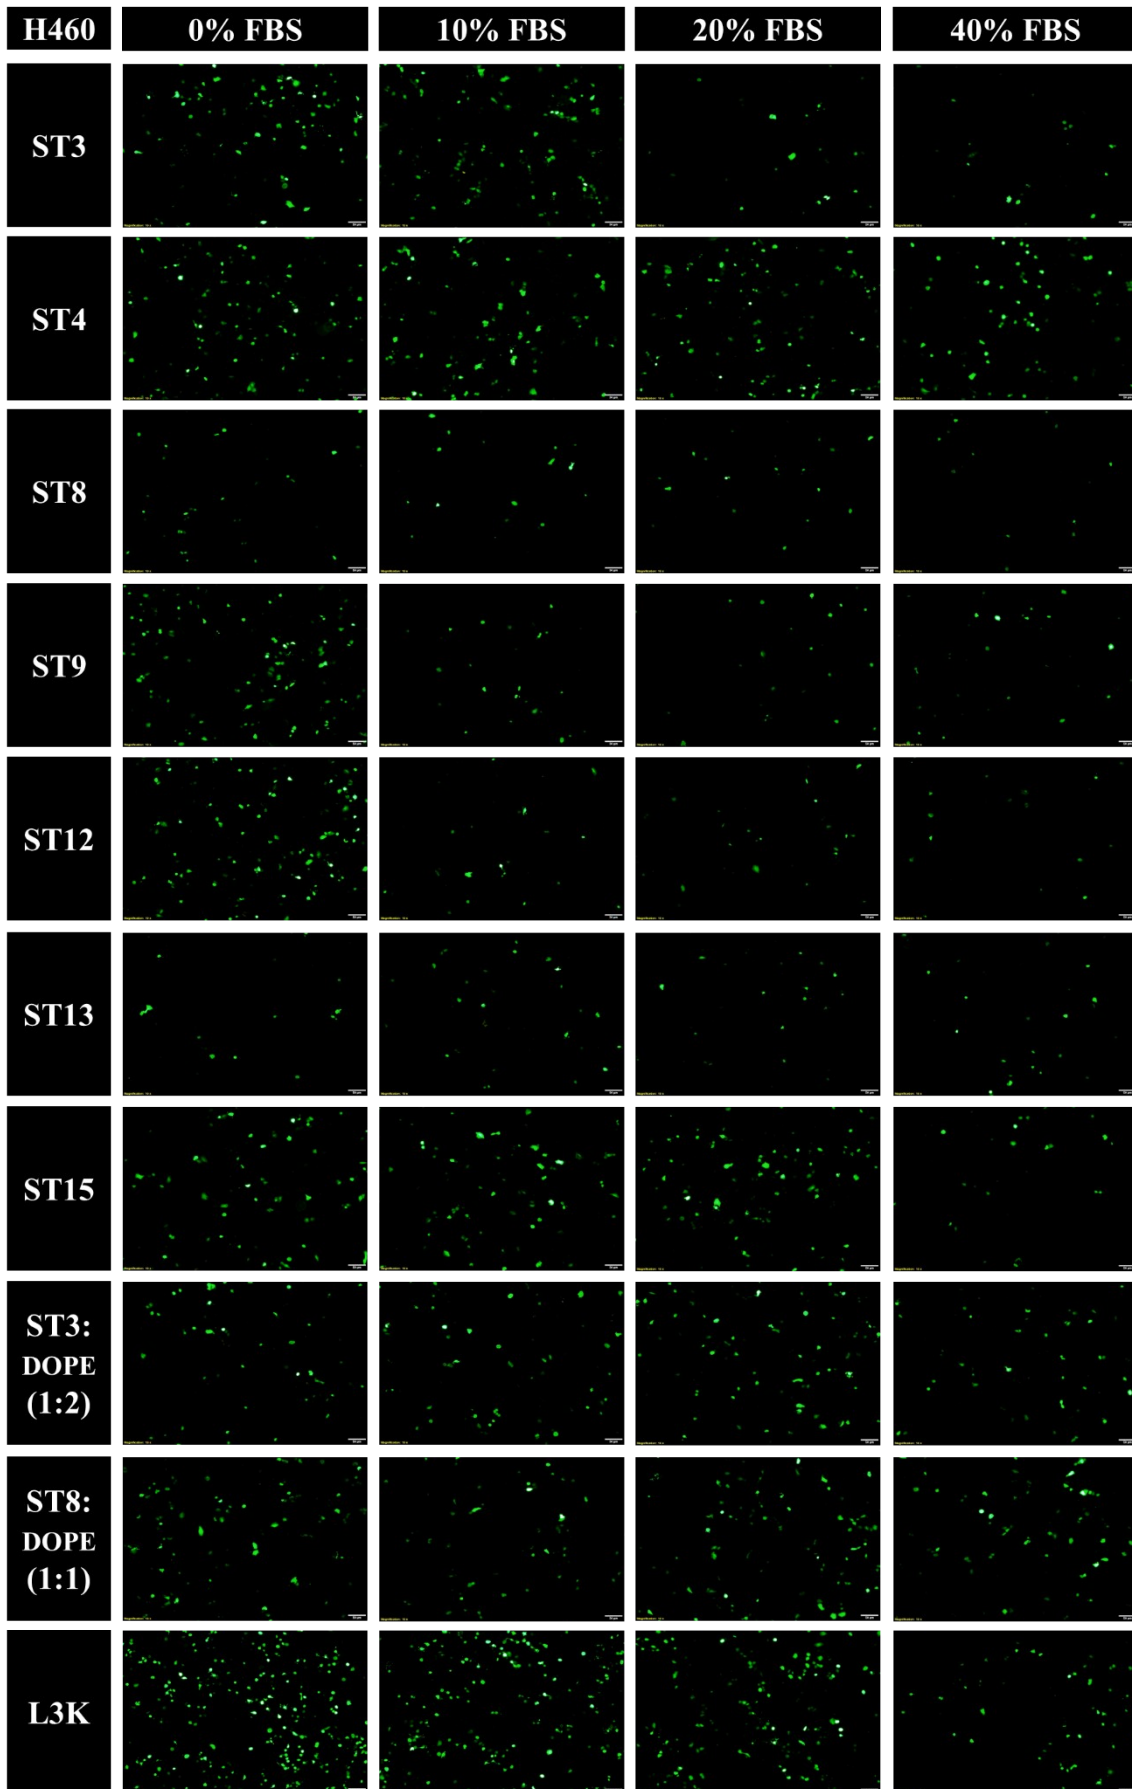

**Fig. S5** Green fluorescent protein expression in H460 cells transfected with lipoplexes of selected lipids under serum-free and in the presence of 10%, 20% and 40% serum medium.

The fluorescence microscope images were captured 48 h post-transfection under 10X magnification. Lipofectamine3000 (L3K) served as positive control. The scale bar is 50  $\mu\text{m}$ .

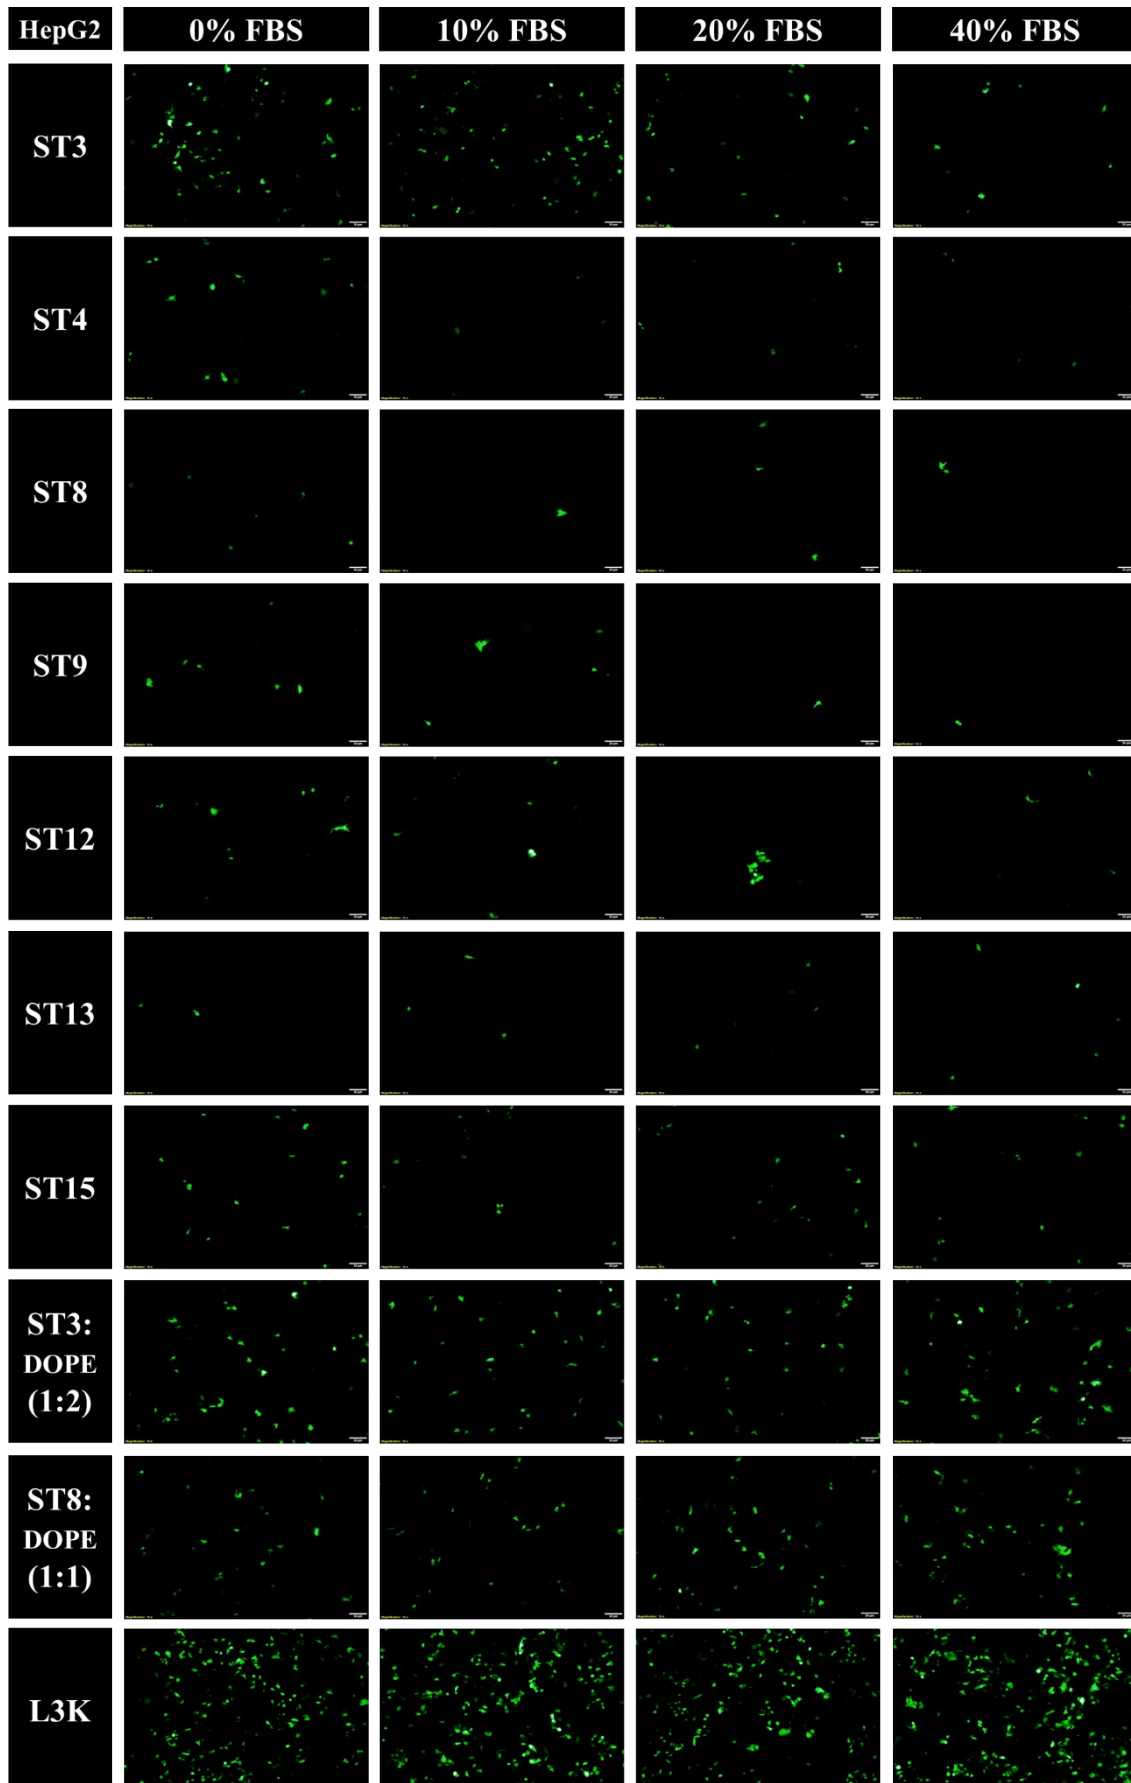

**Fig. S6** Green fluorescent protein expression in HepG2 cells transfected with lipoplexes of selected lipids under serum-free and in the presence of 10%, 20% and 40% serum medium. The fluorescence microscope images were captured 48 h post-transfection under 10X magnification. Lipofectamine3000 (L3K) served as positive control. The scale bar is 50  $\mu\text{m}$ .

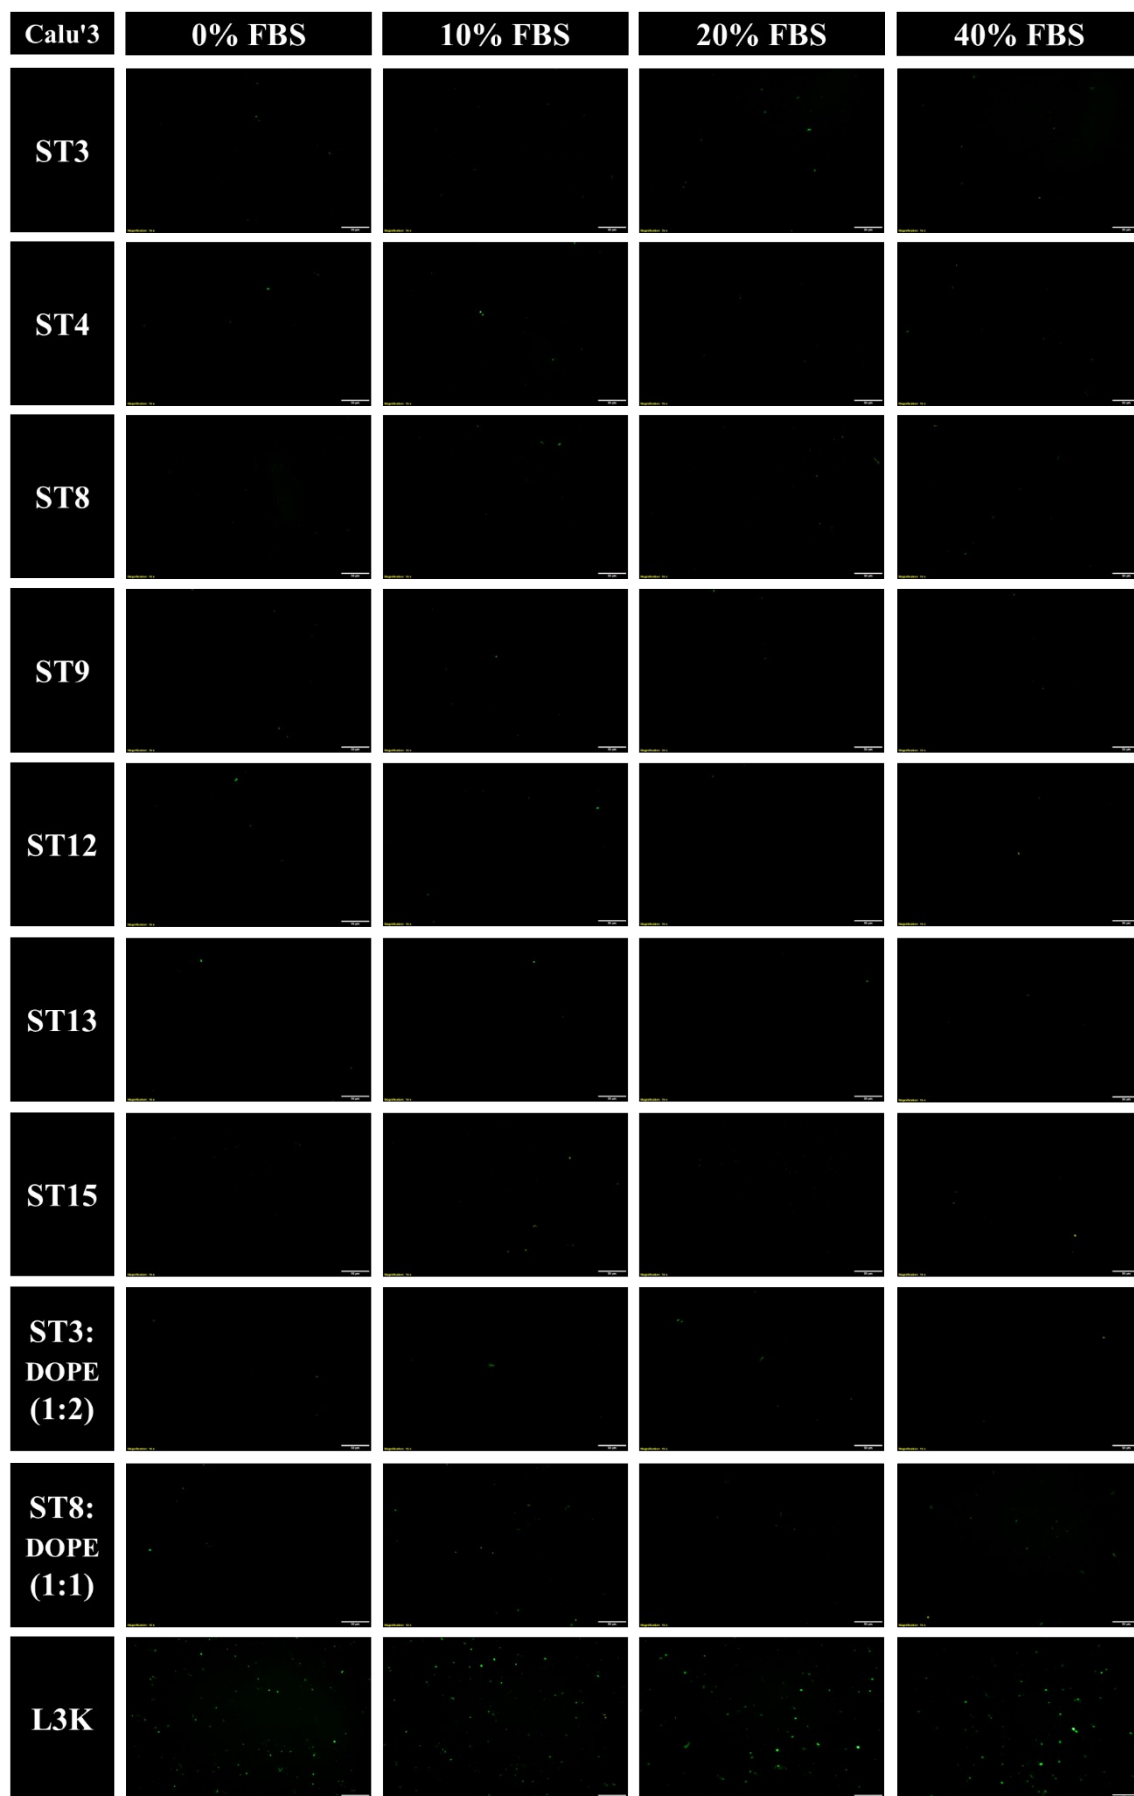

**Fig. S7** Green fluorescent protein expression in Calu'3 cells transfected with lipoplexes of selected lipids under serum-free and in the presence of 10%, 20% and 40% serum medium.

The fluorescence microscope images were captured 48 h post-transfection under 16X magnification. Lipofectamine3000 (L3K) served as positive control. The scale bar is 50  $\mu\text{m}$ .

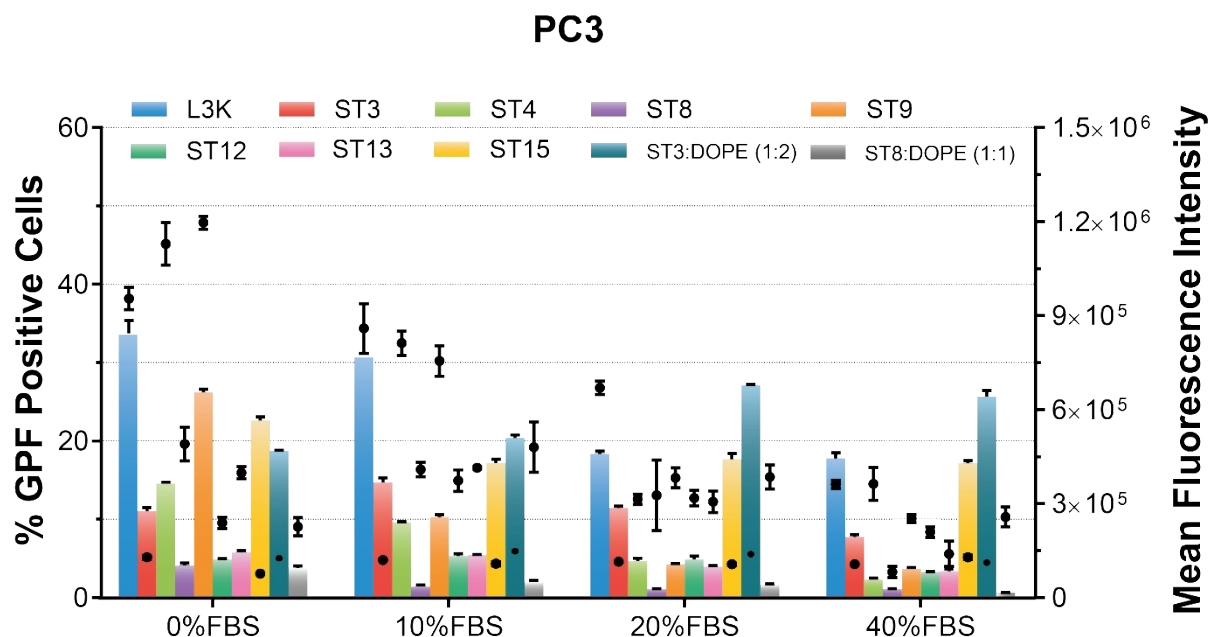

**Fig. S8** The percentage of GFP positive cells (bar graph) and mean fluorescence intensity (■) of PC3 cells transfected with lipoplexes encapsulating pEGFP-C2 in the absence and presence of 10–40% serum. The expression of green fluorescent protein was measured by flow cytometer. Each value represents the mean  $\pm$  S.D. of three measurements.

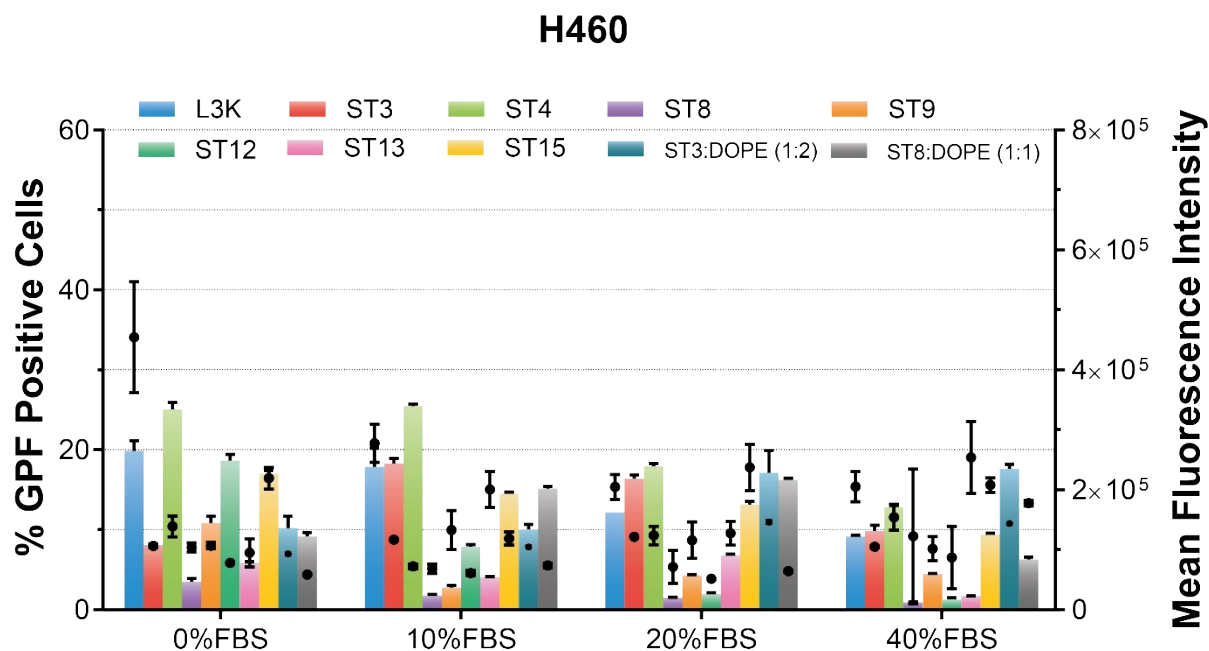

**Fig. S9** The percentage of GFP positive cells (bar graph) and mean fluorescence intensity (■) of H460 cells transfected with lipoplexes encapsulating pEGFP-C2 in the absence and presence of 10–40% serum. The expression of green fluorescent protein was measured by flow cytometer. Each value represents the mean  $\pm$  S.D. of three measurements.

## HepG2

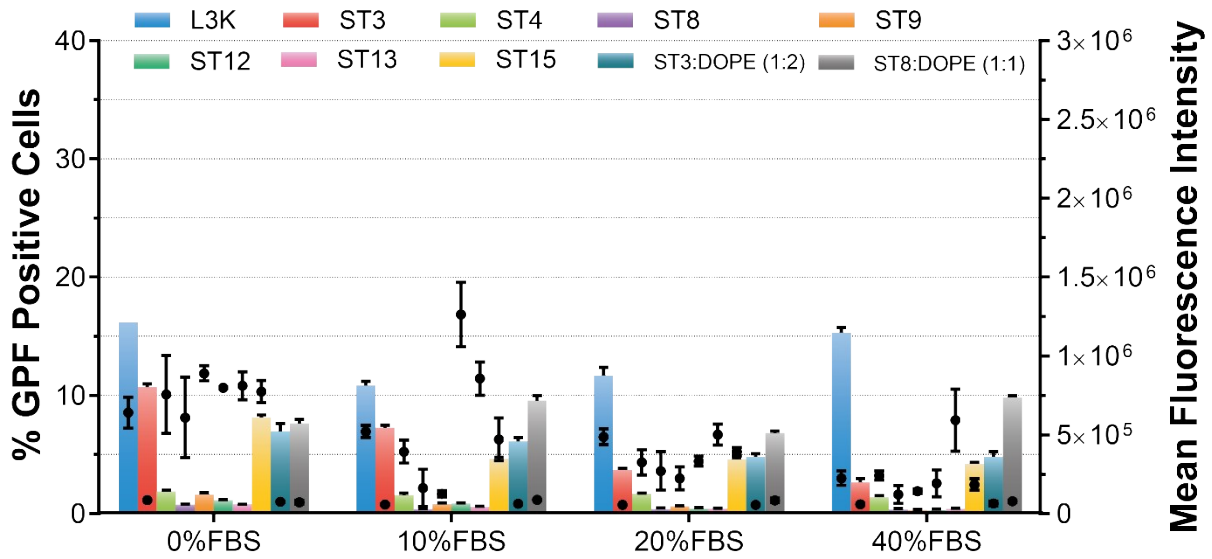

**Fig. S10** The percentage of GFP positive cells (bar graph) and mean fluorescence intensity (■) of HepG2 cells transfected with lipoplexes encapsulating pEGFP-C2 in the absence and presence of 10–40% serum. The expression of green fluorescent protein was measured by flow cytometer. Each value represents the mean  $\pm$  S.D. of three measurements.

## Calu'3

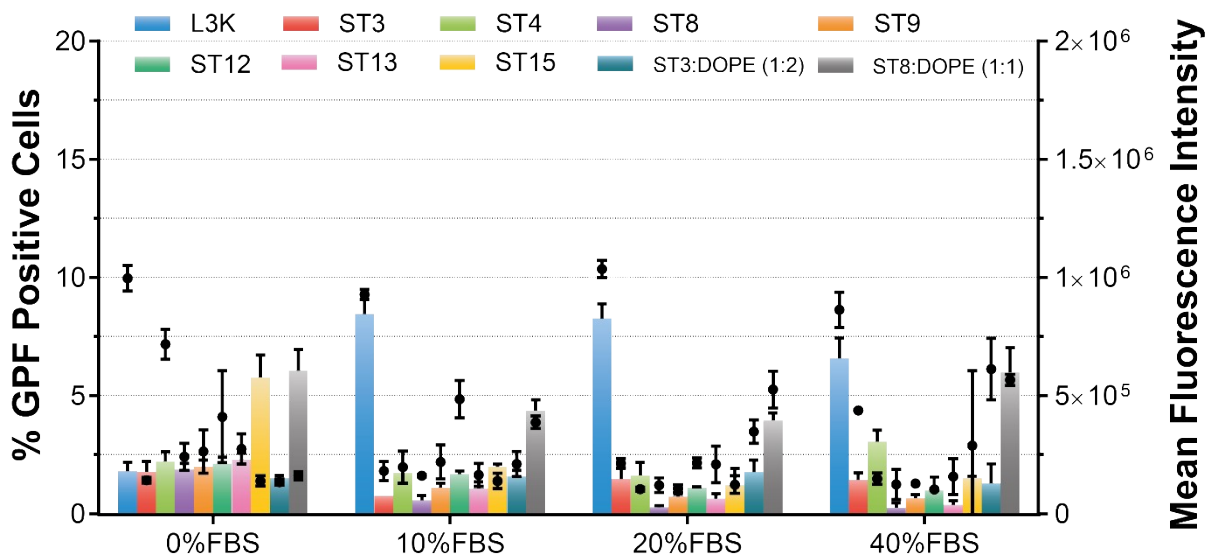

**Fig. S11** The percentage of GFP positive cells (bar graph) and mean fluorescence intensity (■) of Calu'3 cells transfected with lipoplexes encapsulating pEGFP-C2 in the absence and presence of 10–40% serum. The expression of green fluorescent protein was measured by flow cytometer. Each value represents the mean  $\pm$  S.D. of three measurements.

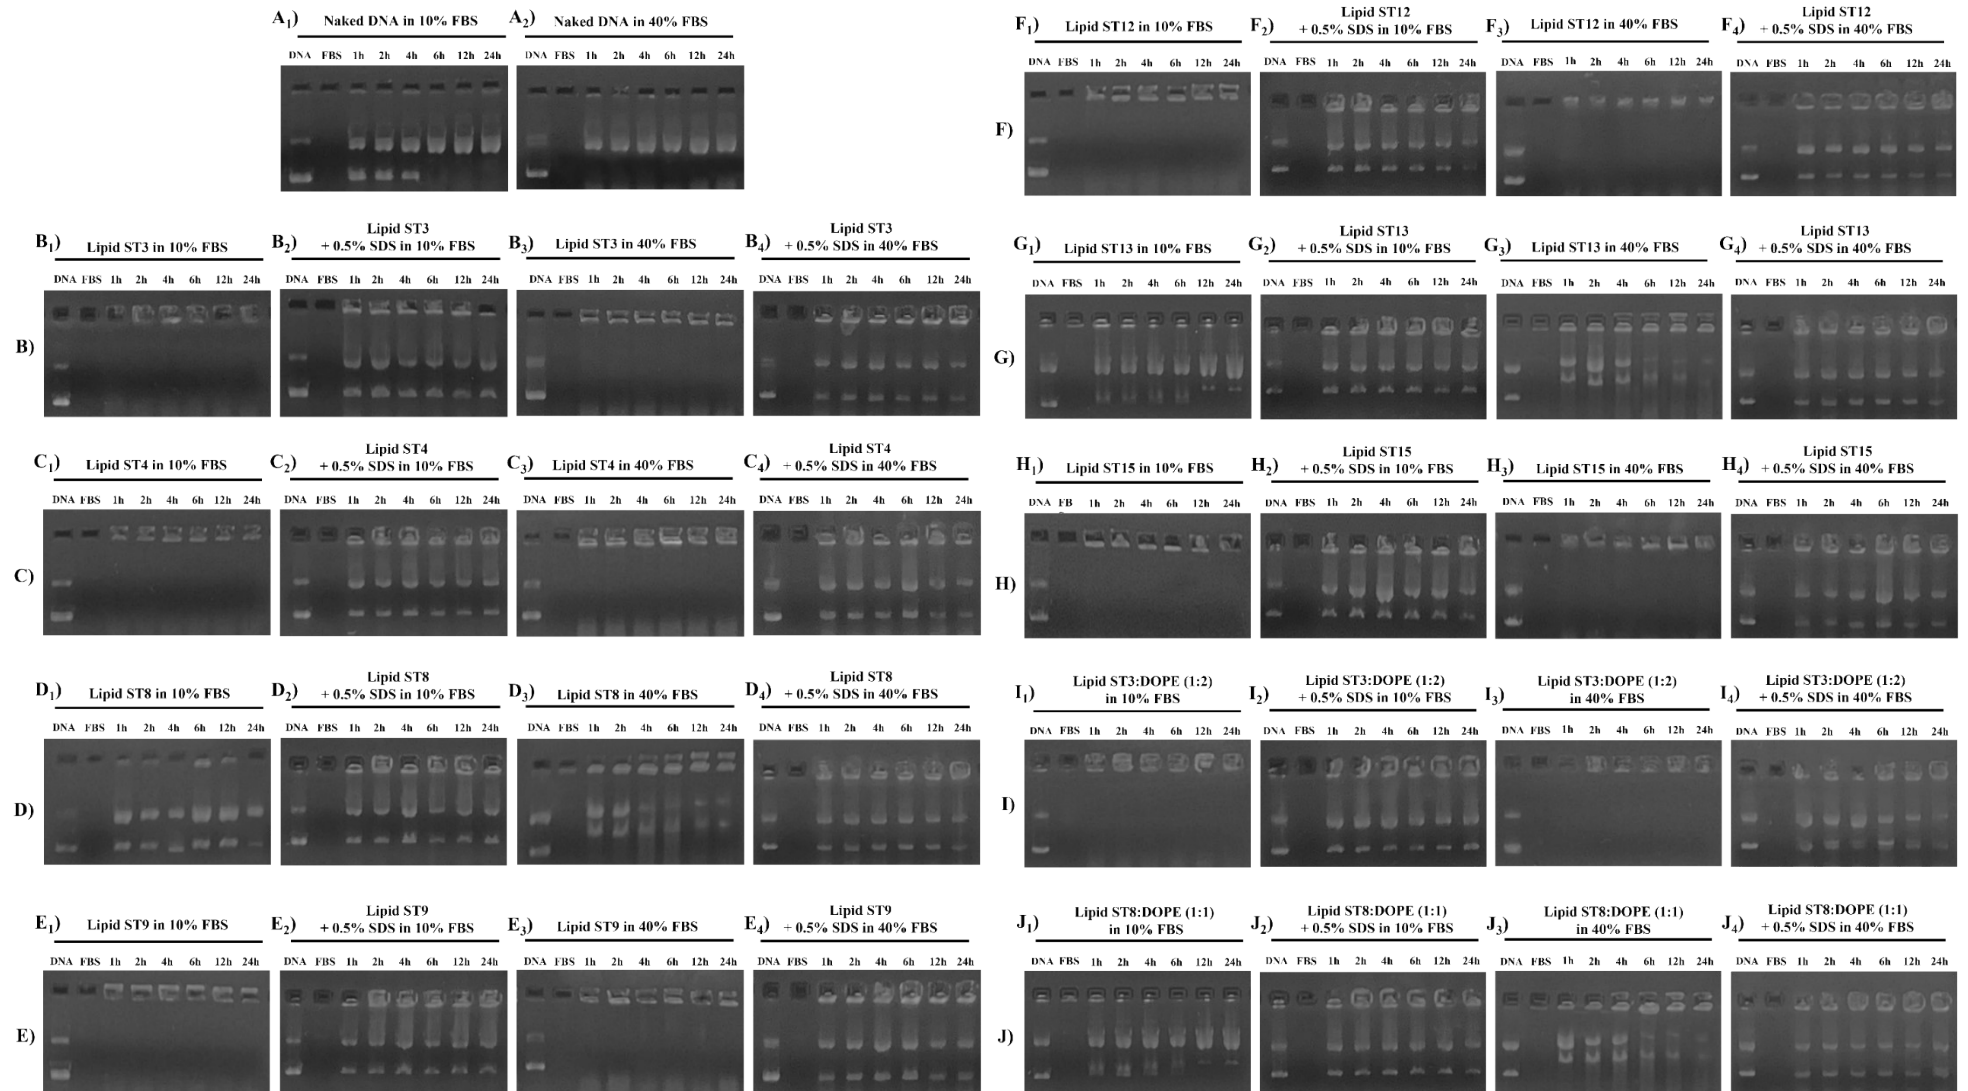

**Fig. S12** Serum stability of plasmid DNA in liposome formulations under 10% and 40% serum concentrations at various times. Stability was analyzed by 1% agarose gel electrophoresis, 100 V for 45 min.

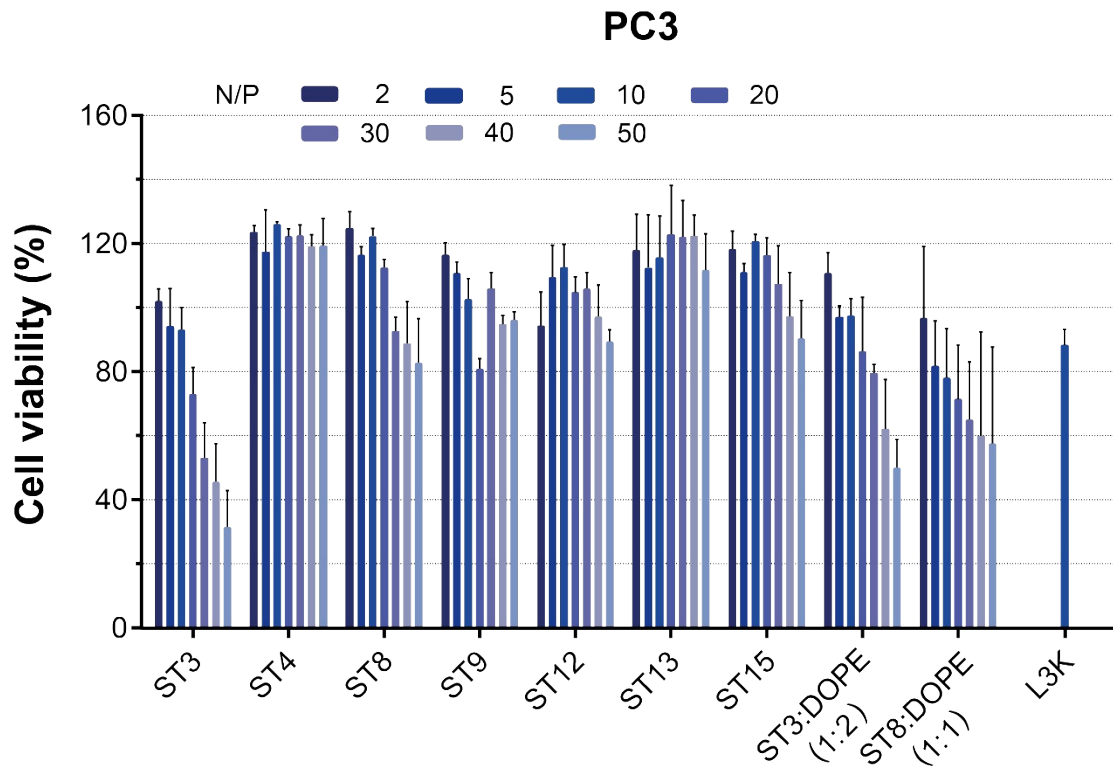

**Fig. S13** Cytotoxicity of T-shape cationic liposome/pEGFP-C2 complexes at different N/P ratios in PC3 cells. The cytotoxicity was determined by MTT assay after 48 h. Each value represents the mean  $\pm$  S.D. of three measurements.

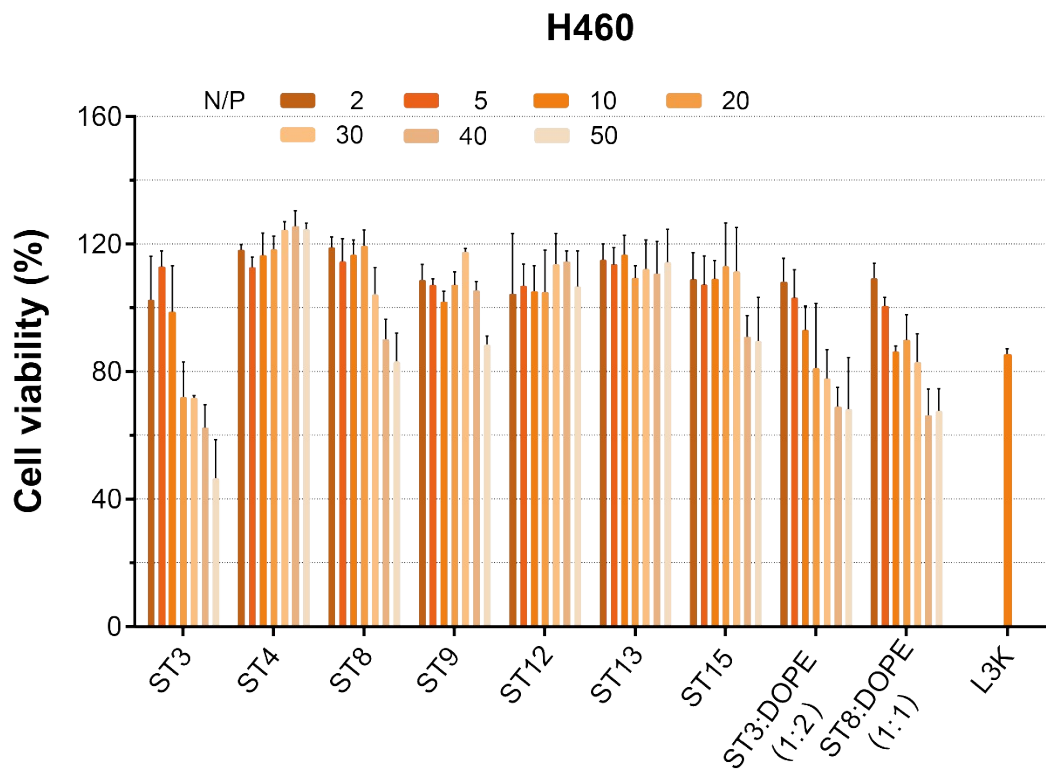



**Fig. S14** Cytotoxicity of T-shape cationic liposome/pEGFP-C2 complexes at different N/P ratios in H460 cells. The cytotoxicity was determined by MTT assay after 48 h. Each value represents the mean  $\pm$  S.D. of three measurements.

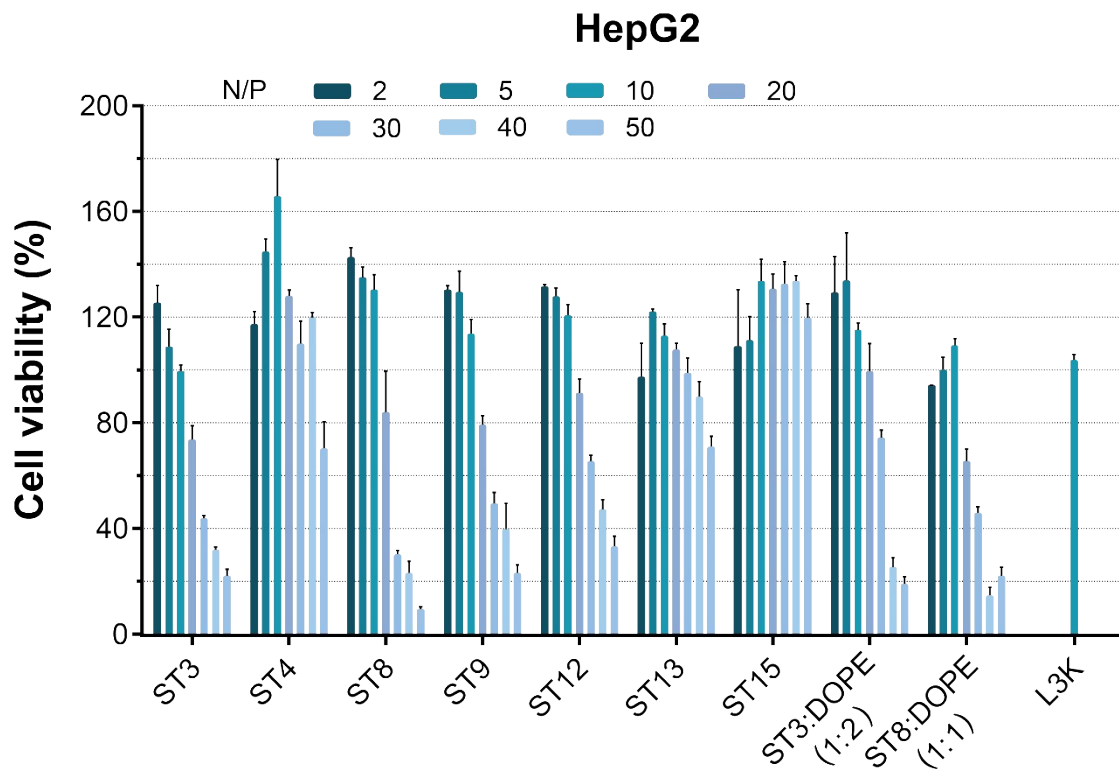

**Fig. S15** Cytotoxicity of T-shape cationic liposome/pEGFP-C2 complexes at different N/P ratios in HepG2 cells. The cytotoxicity was determined by MTT assay after 48 h. Each value represents the mean  $\pm$  S.D. of three measurements.

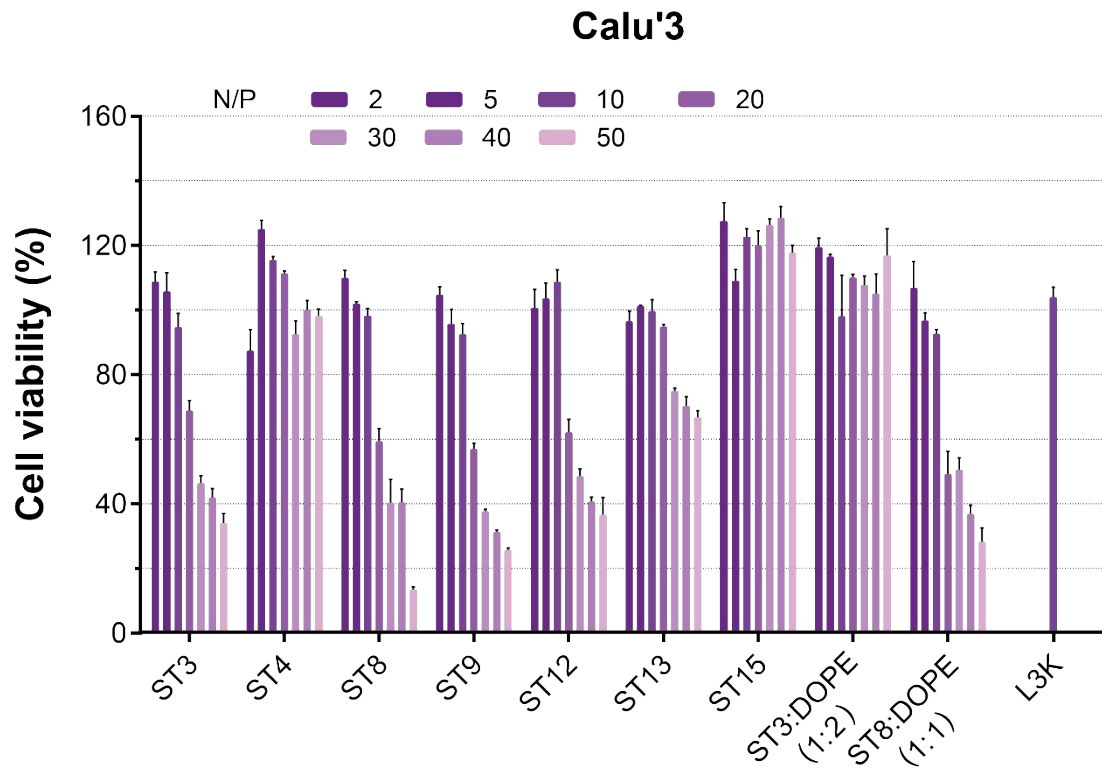

**Fig. S16** Cytotoxicity of T-shape cationic liposome/pEGFP-C2 complexes at different N/P ratios in Calu'3 cells. The cytotoxicity was determined by MTT assay after 48 h. Each value represents the mean  $\pm$  S.D. of three measurements.

BY8123 CT(3)-79 (10.8 mg, CDCl<sub>3</sub>)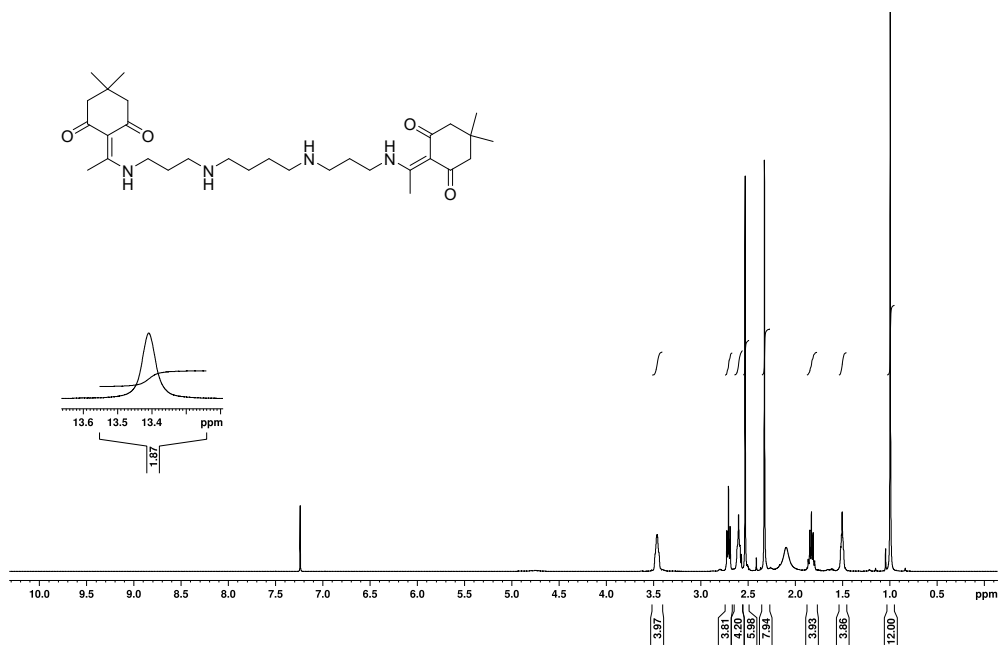**Fig. S17** <sup>1</sup>H NMR Spectrum (400 MHz, CDCl<sub>3</sub>) of compound **8**BY8123 CT(3)-79 (10.8 mg, CDCl<sub>3</sub>)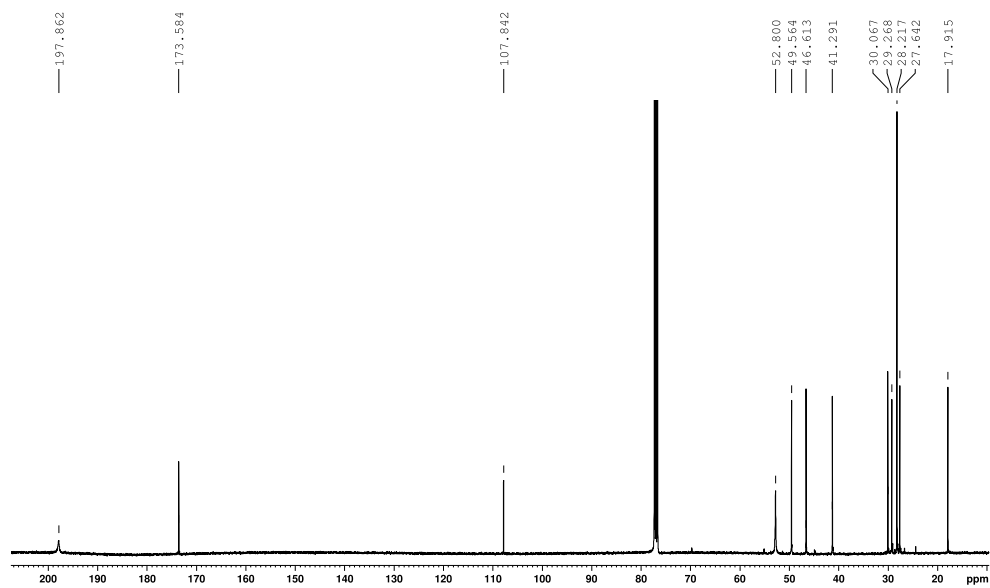**Fig. S18** <sup>13</sup>C NMR Spectrum (100 MHz, CDCl<sub>3</sub>) of compound **8**

---

**Mass Spectrum SmartFormula Report**

---

**Analysis Info**

Analysis Name D:\Data\Boon-ek\ESI\BY-HRMS 1328 (pos).d  
Method tune\_low\_pos1-m.m  
Sample Name CT(3)-79  
Comment

Acquisition Date 8/5/2020 1:30:33 PM

Operator RU  
Instrument micrOTOF 8213750.10411

**Acquisition Parameter**

|             |            |                      |          |                  |           |
|-------------|------------|----------------------|----------|------------------|-----------|
| Source Type | ESI        | Ion Polarity         | Positive | Set Nebulizer    | 2.0 Bar   |
| Focus       | Not active |                      |          | Set Dry Heater   | 180 °C    |
| Scan Begin  | 50 m/z     | Set Capillary        | 4500 V   | Set Dry Gas      | 8.0 l/min |
| Scan End    | 2000 m/z   | Set End Plate Offset | -500 V   | Set Divert Valve | Waste     |

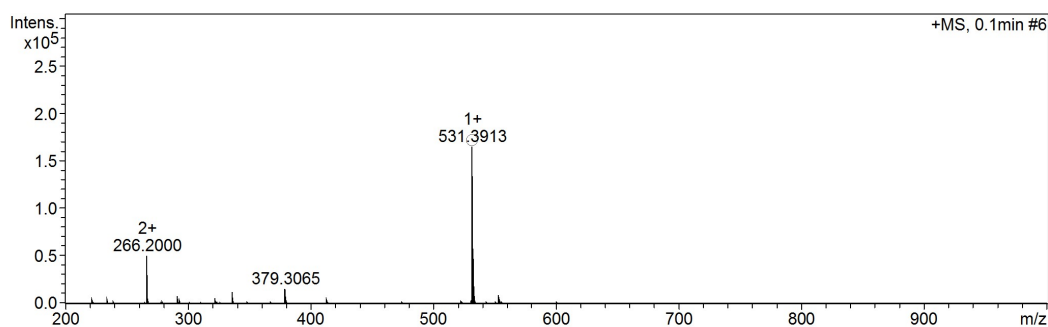

| Meas. m/z  | # | Ion Formula                                                   | m/z        | err  [mDa] | err [ppm] | Mean err [ppm] | rdb | N-Rule | e <sup>-</sup> Conf | mSigma |
|------------|---|---------------------------------------------------------------|------------|------------|-----------|----------------|-----|--------|---------------------|--------|
| 531.391333 | 1 | C <sub>30</sub> H <sub>51</sub> N <sub>4</sub> O <sub>4</sub> | 531.390483 | 0.9        | 1.6       | -1.5           | 7.5 | ok     | even                | 4.3    |

**Fig. S19** HRMS Spectrum of compound **8**

BY7858 CT(3)-81 (52.4 mg, CDCl<sub>3</sub>)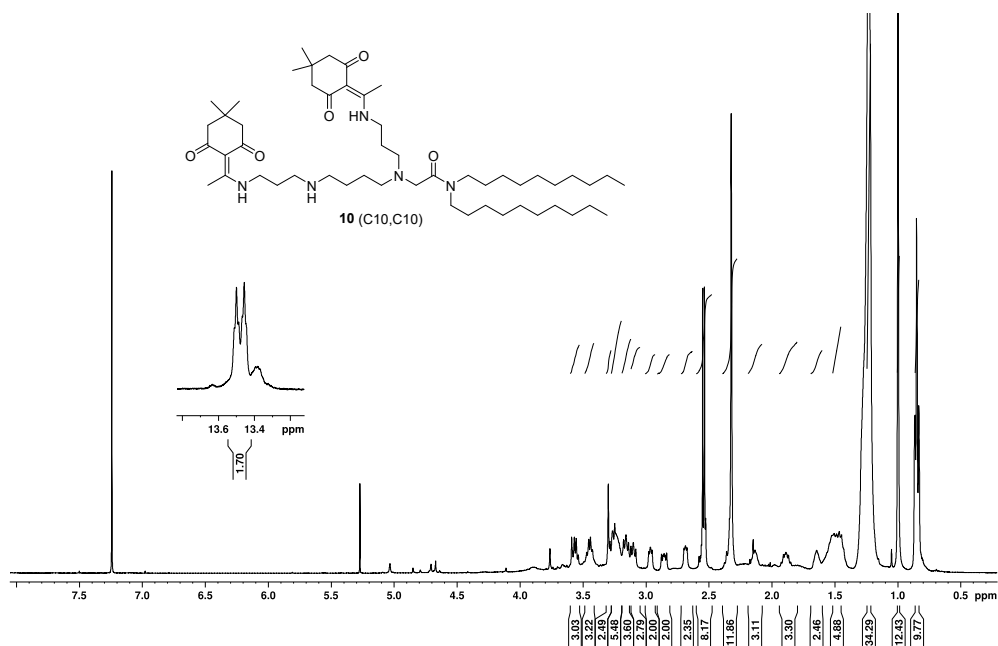

**Fig. S20** <sup>1</sup>H NMR Spectrum (400 MHz, CDCl<sub>3</sub>) of compound **10 (C10,C10)**

BY7858 CT(3)-81 (52.4 mg, CDCl<sub>3</sub>)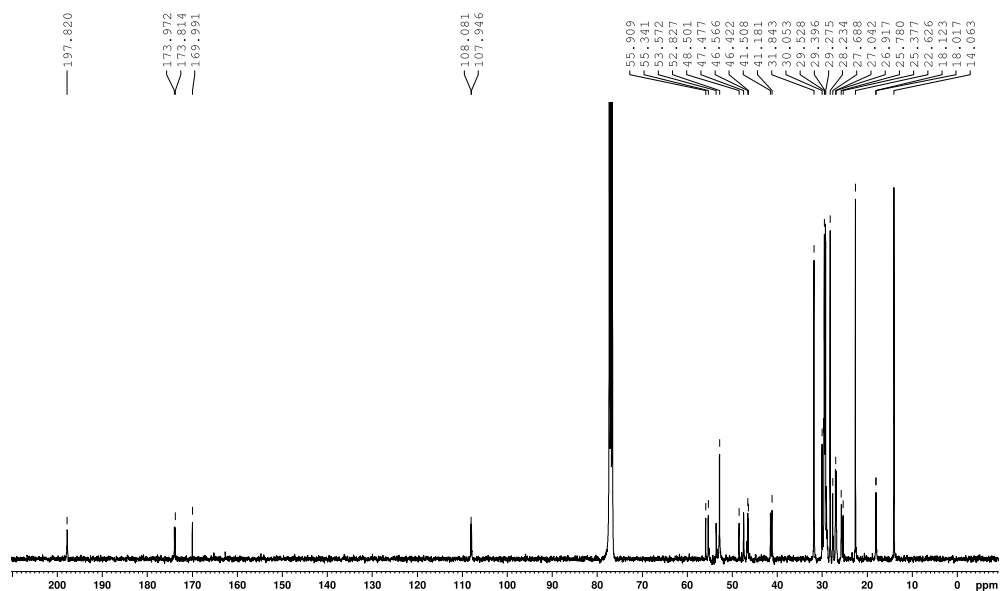

**Fig. S21** <sup>13</sup>C NMR Spectrum (100 MHz, CDCl<sub>3</sub>) of compound **10 (C10,C10)**

---

**Mass Spectrum SmartFormula Report**

---

**Analysis Info**

Analysis Name D:\Data\Boon-ek\ES\BY-HRMS 1501 (pos).d  
Method tune\_wide(pos).m  
Sample Name CT(3)-81  
Comment

Acquisition Date 12/15/2020 3:33:08 PM

Operator RU  
Instrument micrOTOF 8213750.10411

**Acquisition Parameter**

|             |            |                      |          |                  |           |
|-------------|------------|----------------------|----------|------------------|-----------|
| Source Type | ESI        | Ion Polarity         | Positive | Set Nebulizer    | 0.3 Bar   |
| Focus       | Not active |                      |          | Set Dry Heater   | 180 °C    |
| Scan Begin  | 100 m/z    | Set Capillary        | 4500 V   | Set Dry Gas      | 4.0 l/min |
| Scan End    | 4000 m/z   | Set End Plate Offset | -500 V   | Set Divert Valve | Waste     |

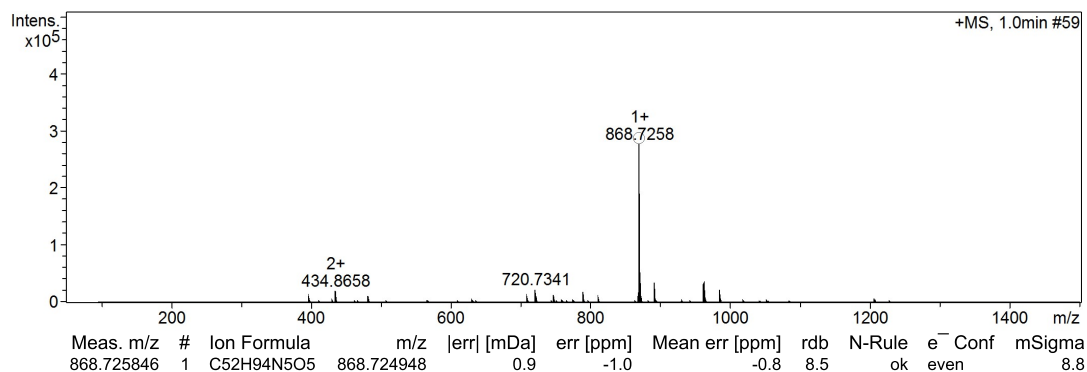**Fig. S22 HRMS Spectrum of compound 10 (C10,C10)**

BY7859 CT(3)-82 (49.9 mg, CDCl<sub>3</sub>)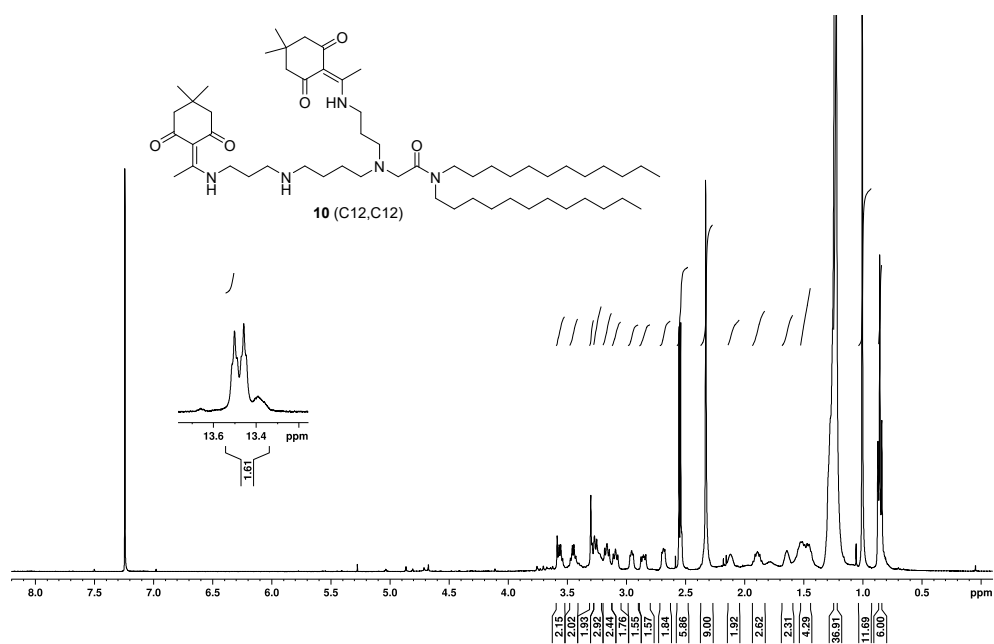Fig. S23 <sup>1</sup>H NMR Spectrum (400 MHz, CDCl<sub>3</sub>) of compound 10 (C12,C12)BY7859 CT(3)-82 (49.9 mg, CDCl<sub>3</sub>)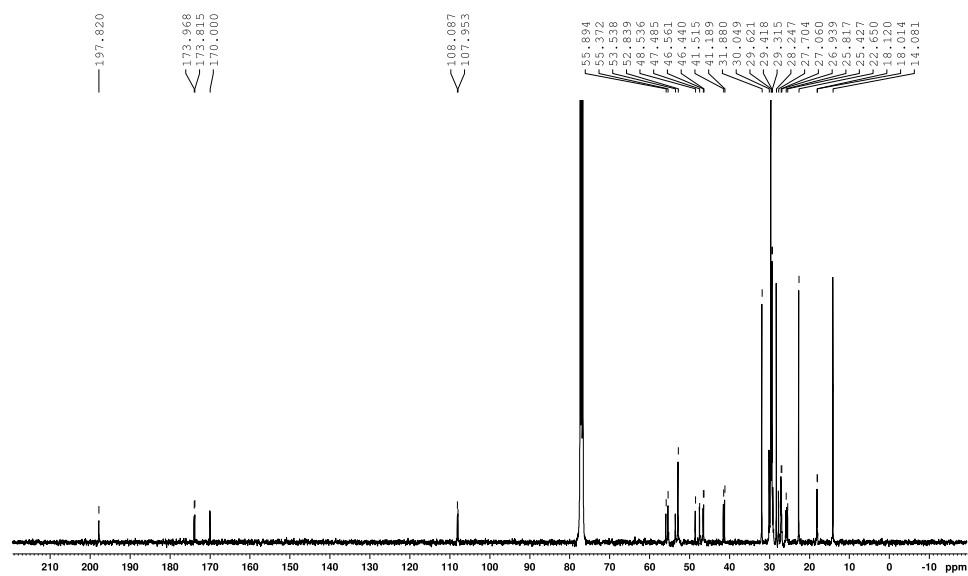Fig. S24 <sup>13</sup>C NMR Spectrum (100 MHz, CDCl<sub>3</sub>) of compound 10 (C12,C12)

---

**Mass Spectrum SmartFormula Report**

---

**Analysis Info**

Analysis Name D:\Data\Boon-ek\ESI\BY-HRMS 1502 (pos).d  
Method tune\_wide(pos).m  
Sample Name CT(3)-82  
Comment

Acquisition Date 12/15/2020 3:35:29 PM  
Operator RU  
Instrument micrOTOF 8213750.10411

**Acquisition Parameter**

|             |            |                      |          |                  |           |
|-------------|------------|----------------------|----------|------------------|-----------|
| Source Type | ESI        | Ion Polarity         | Positive | Set Nebulizer    | 0.3 Bar   |
| Focus       | Not active |                      |          | Set Dry Heater   | 180 °C    |
| Scan Begin  | 100 m/z    | Set Capillary        | 4500 V   | Set Dry Gas      | 4.0 l/min |
| Scan End    | 4000 m/z   | Set End Plate Offset | -500 V   | Set Divert Valve | Waste     |

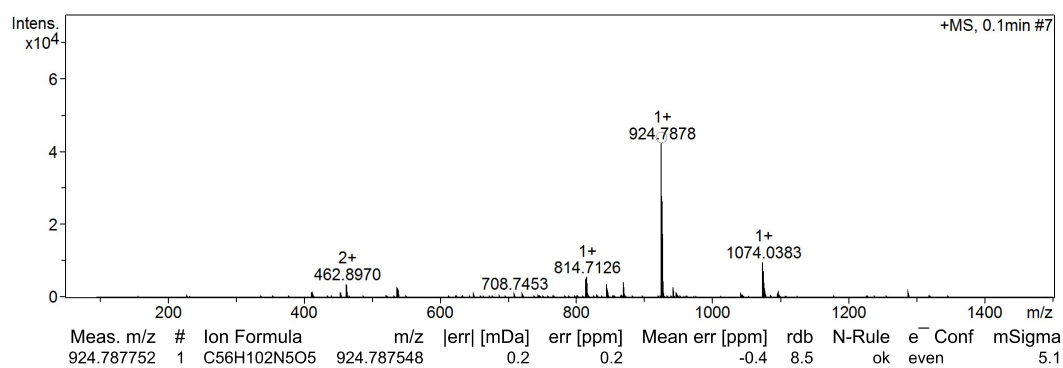**Fig. S25 HRMS Spectrum of compound 10 (C12,C12)**



BY7860 CT(3)-83 (48.5 mg, CDCl<sub>3</sub>)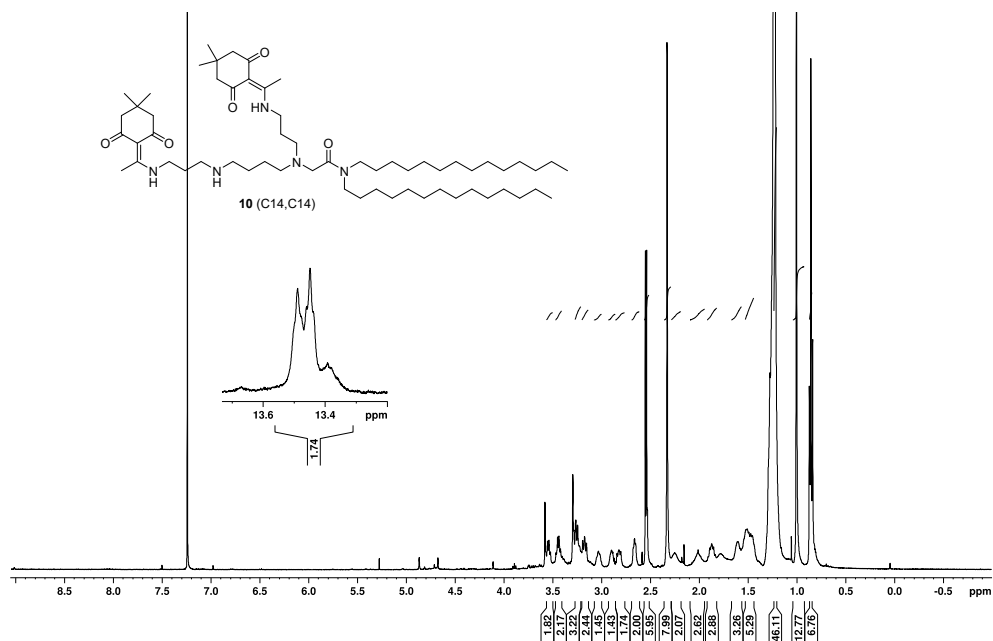Fig. S26 <sup>1</sup>H NMR Spectrum (400 MHz, CDCl<sub>3</sub>) of compound 10 (C14,C14)BY7860 CT(3)-83 (48.5 mg, CDCl<sub>3</sub>)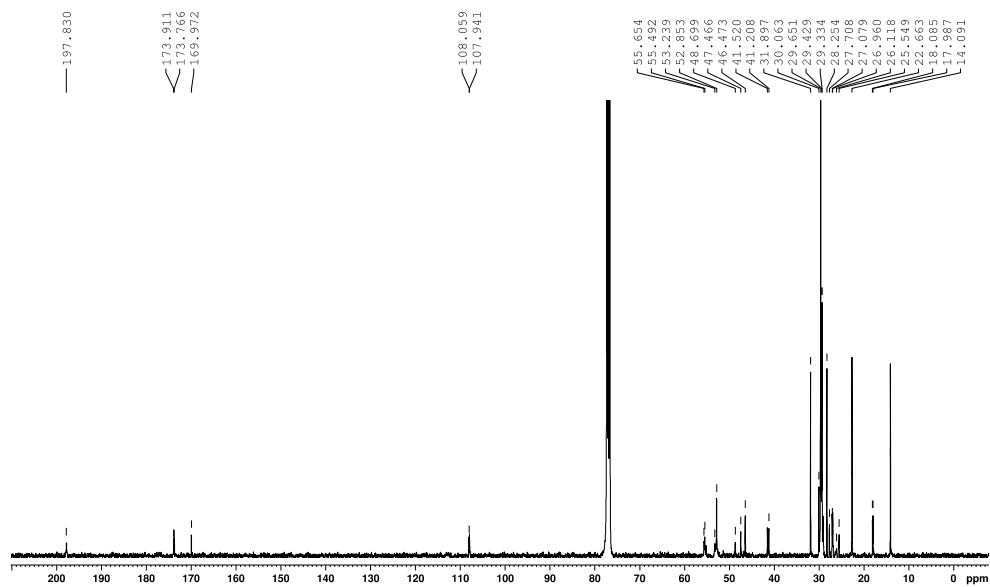Fig. S27 <sup>13</sup>C NMR Spectrum (100 MHz, CDCl<sub>3</sub>) of compound 10 (C14,C14)

---

**Mass Spectrum SmartFormula Report**

---

**Analysis Info**

Analysis Name D:\Data\Boon-ek\ESI\BY-HRMS 1521 (pos).d  
Method tune\_wide-RU.m  
Sample Name CT(3)-83  
Comment

Acquisition Date 12/22/2020 3:07:41 PM

Operator RU  
Instrument micrOTOF 8213750.10411

**Acquisition Parameter**

|             |            |                      |          |                  |           |
|-------------|------------|----------------------|----------|------------------|-----------|
| Source Type | ESI        | Ion Polarity         | Positive | Set Nebulizer    | 0.3 Bar   |
| Focus       | Not active |                      |          | Set Dry Heater   | 180 °C    |
| Scan Begin  | 50 m/z     | Set Capillary        | 4500 V   | Set Dry Gas      | 4.0 l/min |
| Scan End    | 4000 m/z   | Set End Plate Offset | -500 V   | Set Divert Valve | Waste     |

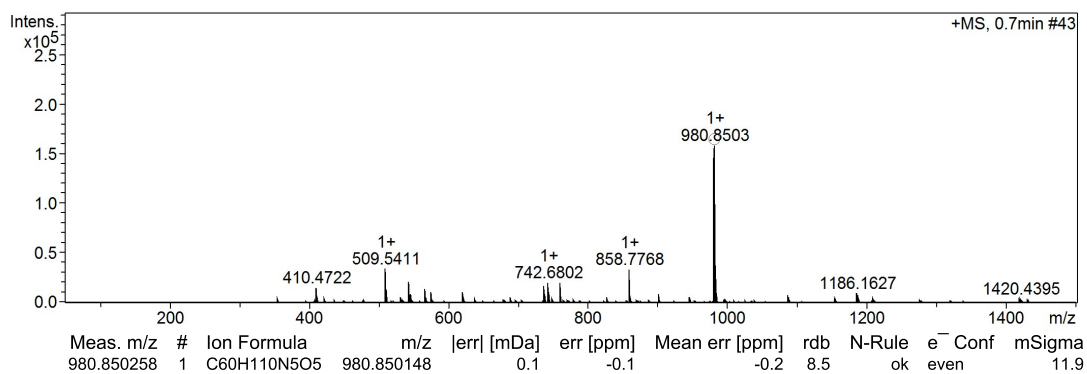**Fig. S28 HRMS Spectrum of compound 10 (C14,C14)**

BY7857 CT(3)-80 (53.9 mg, CDCl<sub>3</sub>)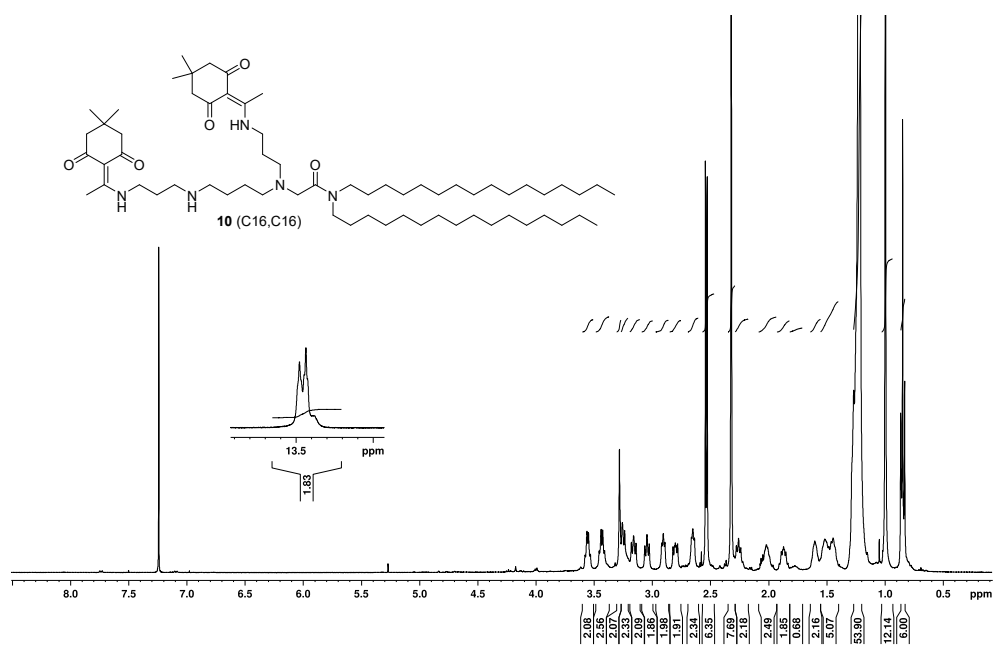BY7857 CT(3)-80 (53.9 mg, CDCl<sub>3</sub>)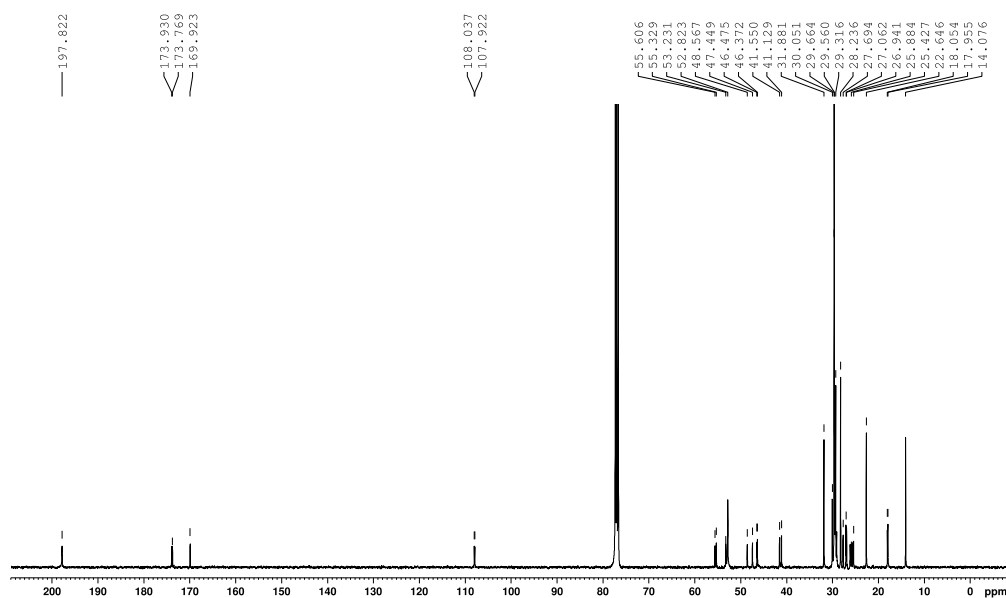

---

**Mass Spectrum SmartFormula Report**

---

**Analysis Info**

Analysis Name D:\Data\Boon-ek\ESI\BY-HRMS 1506 (pos).d  
Method tune\_wide(pos).m  
Sample Name CT(3)-80  
Comment

Acquisition Date 12/15/2020 3:49:35 PM

Operator RU  
Instrument micrOTOF 8213750.10411

**Acquisition Parameter**

|             |            |                      |          |                  |           |
|-------------|------------|----------------------|----------|------------------|-----------|
| Source Type | ESI        | Ion Polarity         | Positive | Set Nebulizer    | 0.3 Bar   |
| Focus       | Not active |                      |          | Set Dry Heater   | 180 °C    |
| Scan Begin  | 100 m/z    | Set Capillary        | 4500 V   | Set Dry Gas      | 4.0 l/min |
| Scan End    | 4000 m/z   | Set End Plate Offset | -500 V   | Set Divert Valve | Waste     |

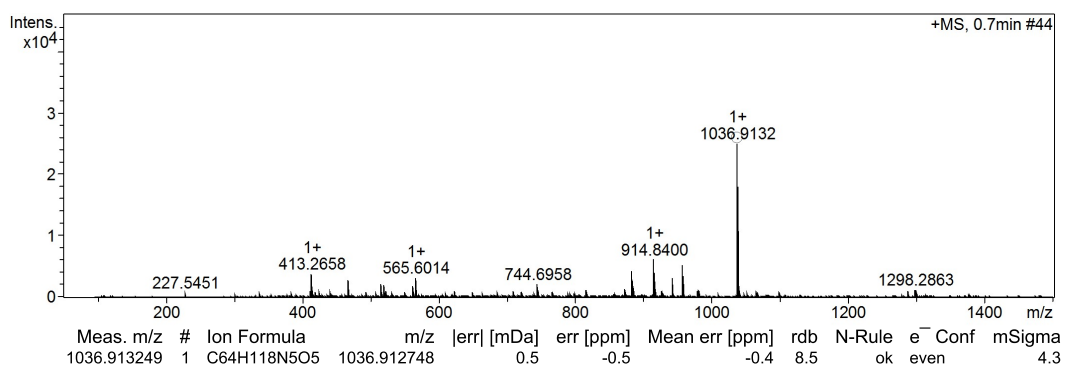**Fig. S31** HRMS Spectrum of compound **10** (C<sub>16</sub>,C<sub>16</sub>)

BY7861 CT(3)-84 (52.0 mg, CDCl<sub>3</sub>)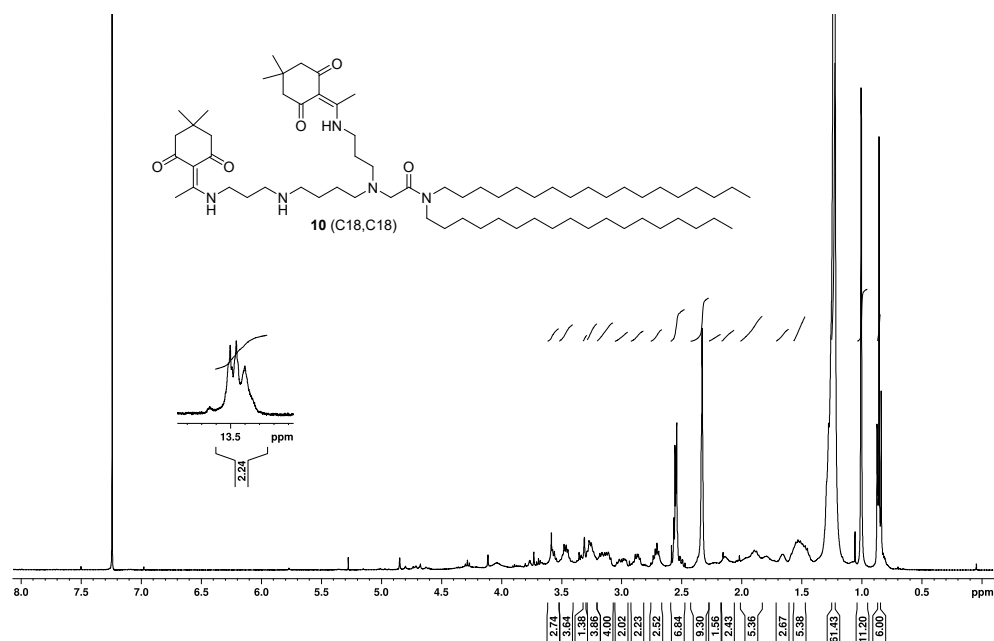BY7861 CT(3)-84 (52.0 mg, CDCl<sub>3</sub>)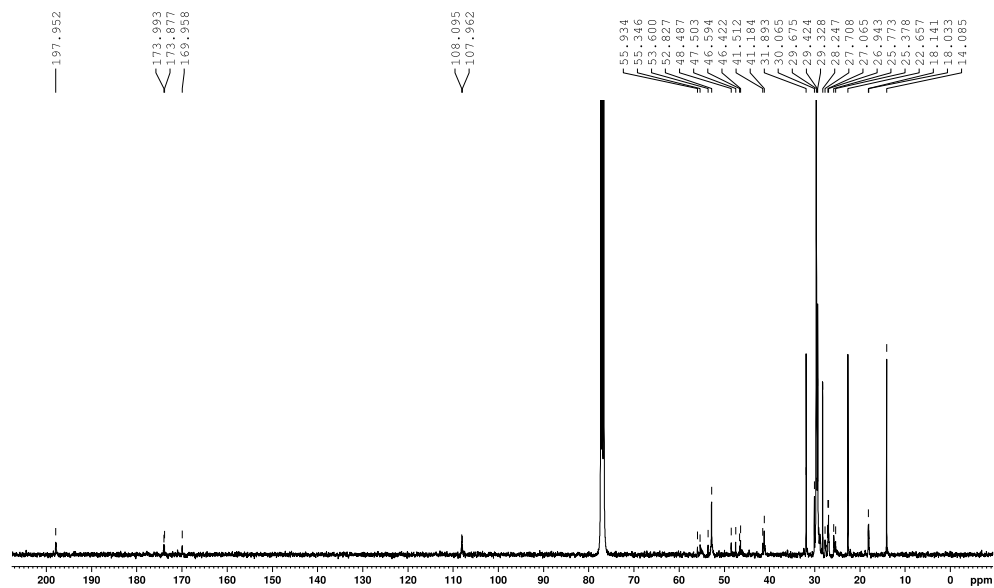

---

**Mass Spectrum SmartFormula Report**

---

**Analysis Info**

Analysis Name D:\Data\Boon-ek\ESI\BY-HRMS 1522 (pos).d  
Method tune\_wide-RU.m  
Sample Name CT(3)-84  
Comment

Acquisition Date 12/22/2020 3:09:08 PM

Operator RU  
Instrument micrOTOF 8213750.10411

**Acquisition Parameter**

|             |            |                      |          |                  |           |
|-------------|------------|----------------------|----------|------------------|-----------|
| Source Type | ESI        | Ion Polarity         | Positive | Set Nebulizer    | 0.3 Bar   |
| Focus       | Not active |                      |          | Set Dry Heater   | 180 °C    |
| Scan Begin  | 50 m/z     | Set Capillary        | 4500 V   | Set Dry Gas      | 4.0 l/min |
| Scan End    | 4000 m/z   | Set End Plate Offset | -500 V   | Set Divert Valve | Waste     |

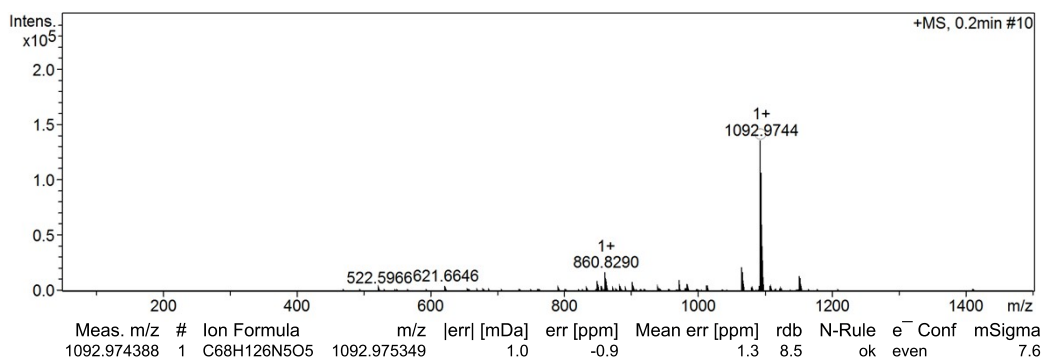**Fig. S34 HRMS Spectrum of compound 10 (C<sub>18</sub>,C<sub>18</sub>)**

BY7862 CT(3)-85 (51.1 mg, CDCl<sub>3</sub>)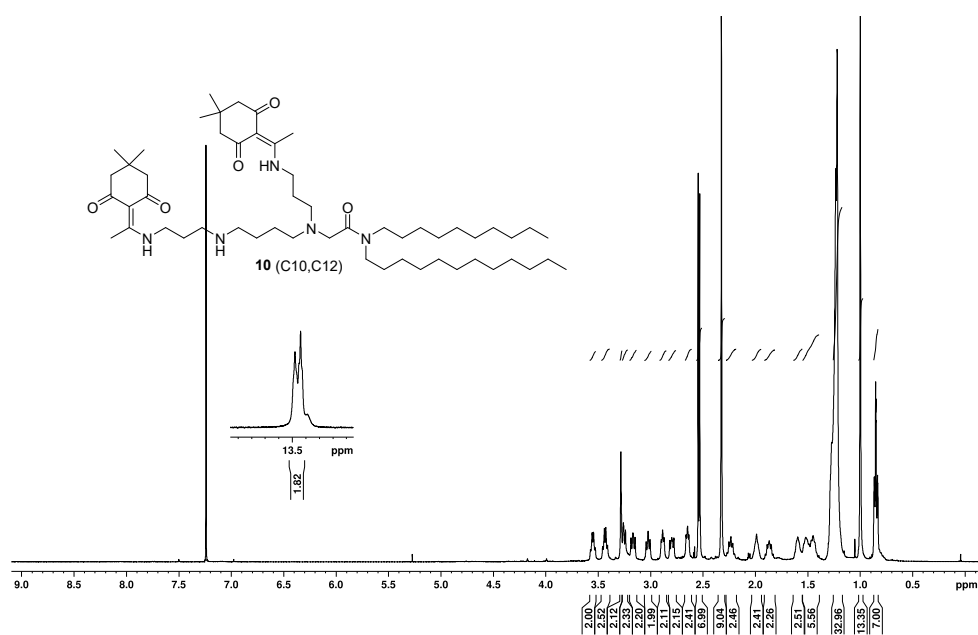

**Fig. S35** <sup>1</sup>H NMR Spectrum (400 MHz, CDCl<sub>3</sub>) of compound 10 (C10,C12)

BY7862 CT(3)-85 (51.1 mg, CDCl<sub>3</sub>)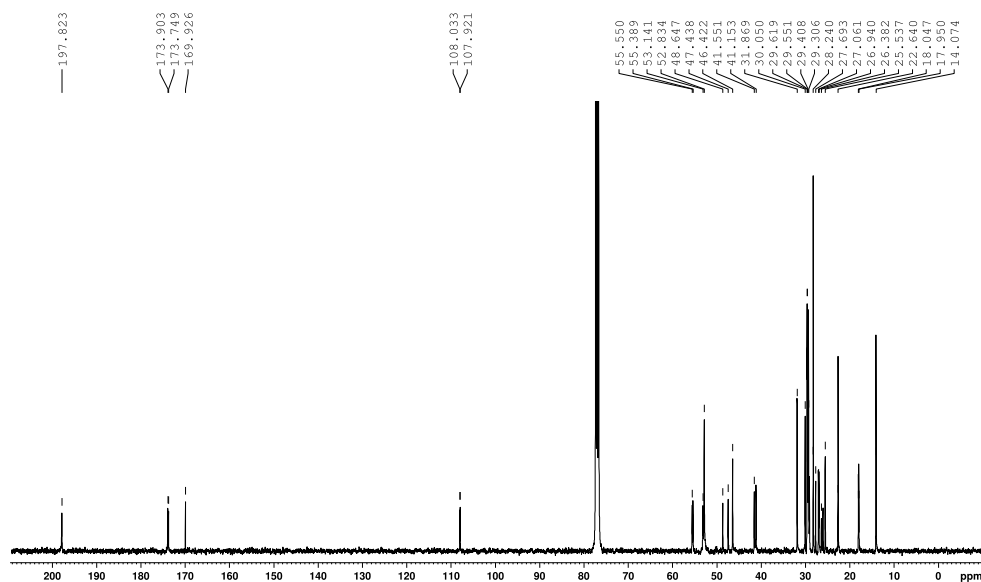

**Fig. S36** <sup>13</sup>C NMR Spectrum (100 MHz, CDCl<sub>3</sub>) of compound 10 (C10,C12)

---

**Mass Spectrum SmartFormula Report**

---

**Analysis Info**

Analysis Name D:\Data\Boon-ek\ESI\BY-HRMS 1523 (pos).d  
Method tune\_wide-RU.m  
Sample Name CT(3)-85  
Comment

Acquisition Date 12/22/2020 3:10:35 PM  
Operator RU  
Instrument micrOTOF 8213750.10411

**Acquisition Parameter**

|             |            |                      |          |                  |           |
|-------------|------------|----------------------|----------|------------------|-----------|
| Source Type | ESI        | Ion Polarity         | Positive | Set Nebulizer    | 0.3 Bar   |
| Focus       | Not active |                      |          | Set Dry Heater   | 180 °C    |
| Scan Begin  | 50 m/z     | Set Capillary        | 4500 V   | Set Dry Gas      | 4.0 l/min |
| Scan End    | 4000 m/z   | Set End Plate Offset | -500 V   | Set Divert Valve | Waste     |

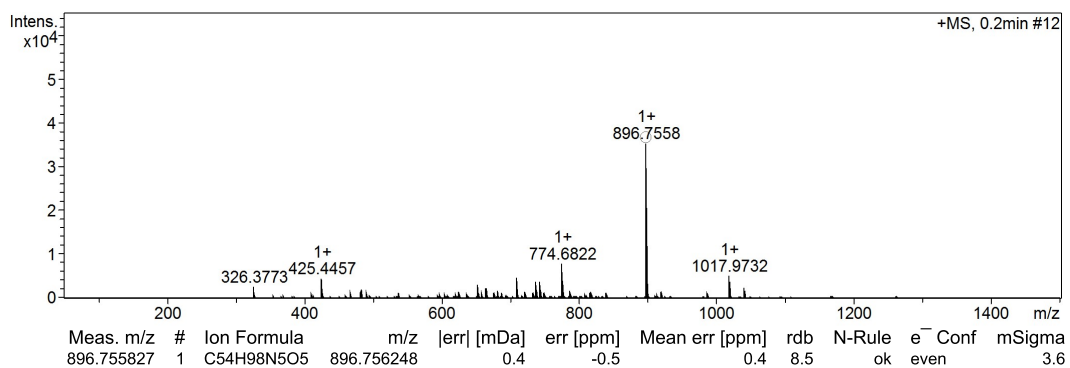**Fig. S37 HRMS Spectrum of compound 10 (C10,C12)**



BY7863 CT(3)-86 (37.3 mg, CDCl<sub>3</sub>)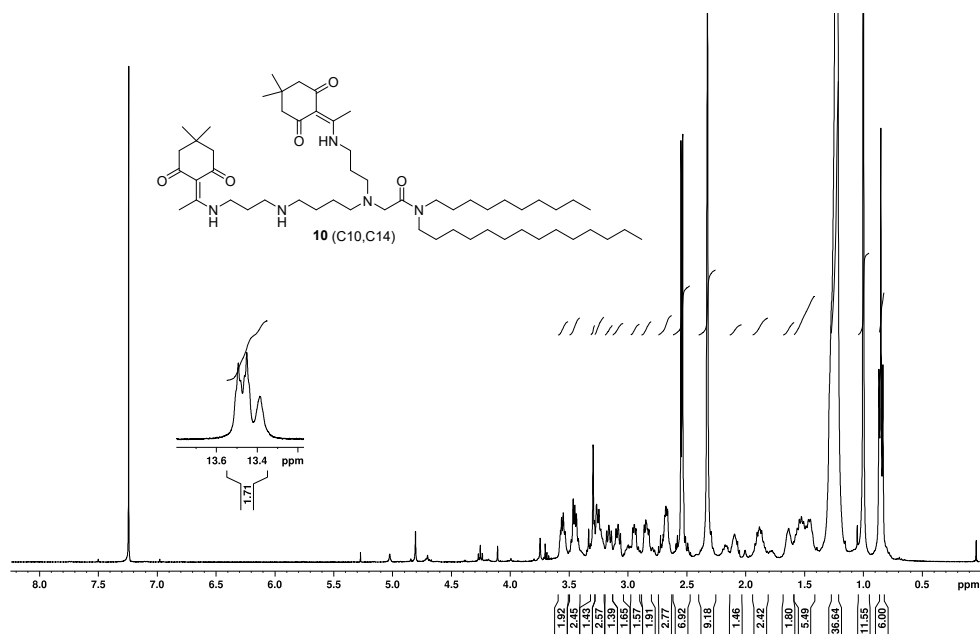

**Fig. S38** <sup>1</sup>H NMR Spectrum (400 MHz, CDCl<sub>3</sub>) of compound **10 (C10,C14)**

BY7863 CT(3)-86 (37.3 mg, CDCl<sub>3</sub>)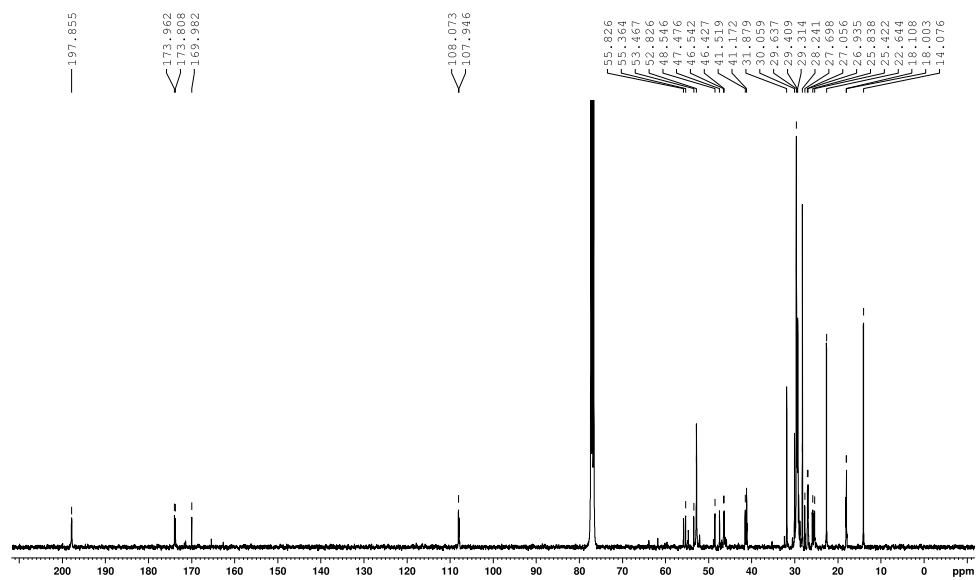

**Fig. S39** <sup>13</sup>C NMR Spectrum (100 MHz, CDCl<sub>3</sub>) of compound **10 (C10,C14)**

---

**Mass Spectrum SmartFormula Report**

---

**Analysis Info**

Analysis Name D:\Data\Boon-ek\ESI\BY-HRMS 1524 (pos).d  
Method tune\_wide-RU.m  
Sample Name CT(3)-86  
Comment

Acquisition Date 12/22/2020 3:11:47 PM  
Operator RU  
Instrument micrOTOF 8213750.10411

**Acquisition Parameter**

|             |            |                      |          |                  |           |
|-------------|------------|----------------------|----------|------------------|-----------|
| Source Type | ESI        | Ion Polarity         | Positive | Set Nebulizer    | 0.3 Bar   |
| Focus       | Not active |                      |          | Set Dry Heater   | 180 °C    |
| Scan Begin  | 50 m/z     | Set Capillary        | 4500 V   | Set Dry Gas      | 4.0 l/min |
| Scan End    | 4000 m/z   | Set End Plate Offset | -500 V   | Set Divert Valve | Waste     |

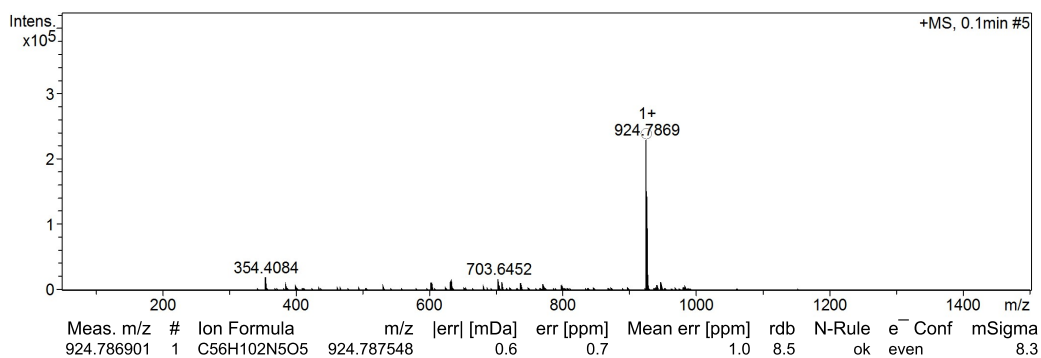**Fig. S40** HRMS Spectrum of compound **10 (C10,C14)**

BY7864 CT(3)-87 (48.1 mg, CDCl<sub>3</sub>)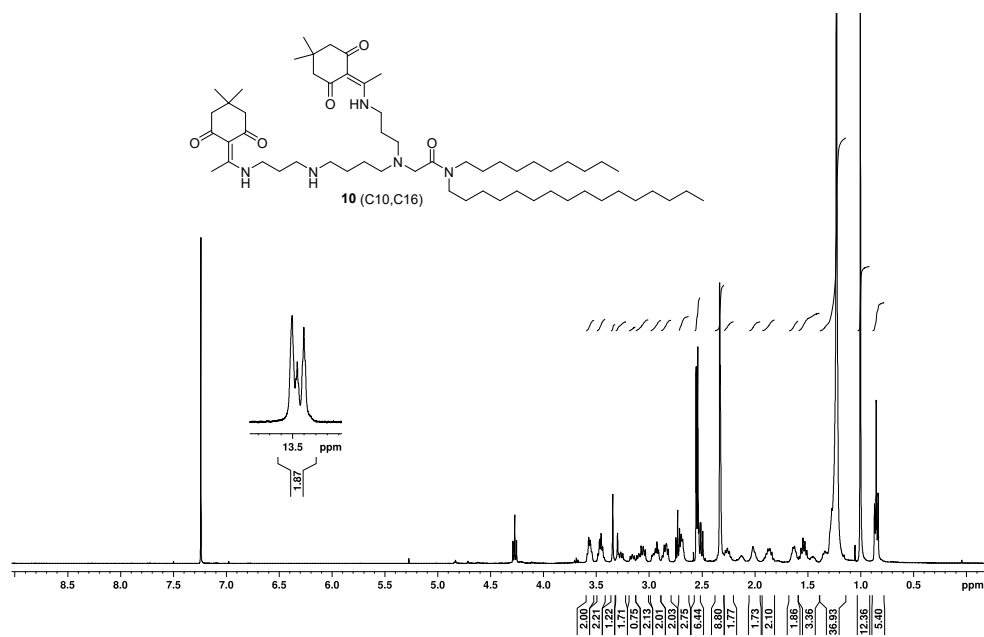Fig. S41 <sup>1</sup>H NMR Spectrum (400 MHz, CDCl<sub>3</sub>) of compound 10 (C<sub>10</sub>,C<sub>16</sub>)BY7864 CT(3)-87 (48.1 mg, CDCl<sub>3</sub>)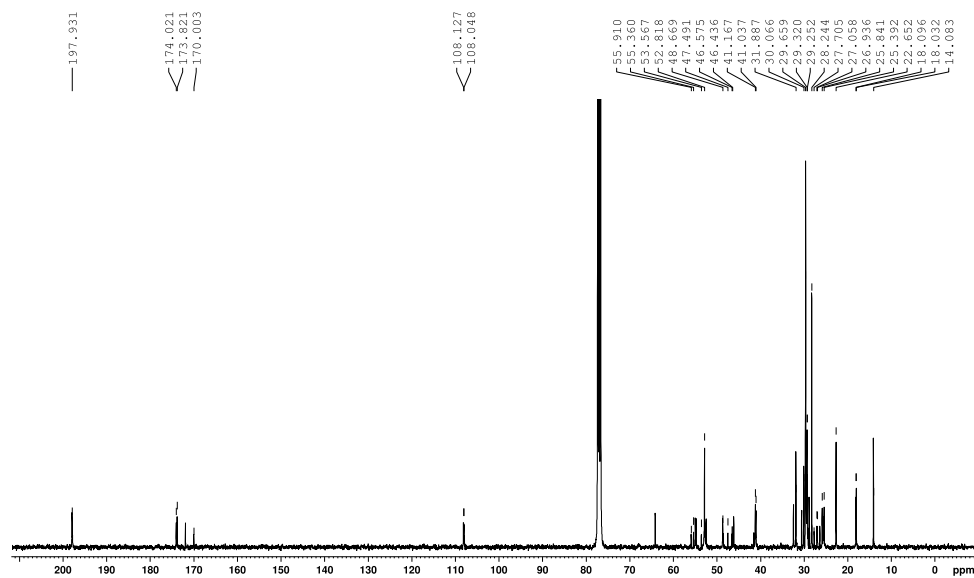Fig. S42 <sup>13</sup>C NMR Spectrum (100 MHz, CDCl<sub>3</sub>) of compound 10 (C<sub>10</sub>,C<sub>16</sub>)

---

**Mass Spectrum SmartFormula Report**

---

**Analysis Info**

Analysis Name D:\Data\Boon-ek\ESI\BY-HRMS 1524 (pos).d Acquisition Date 12/22/2020 3:11:47 PM  
Method tune\_wide-RU.m Operator RU  
Sample Name CT(3)-86 Instrument micrOTOF 8213750.10411  
Comment

**Acquisition Parameter**

|             |            |                      |          |                  |           |
|-------------|------------|----------------------|----------|------------------|-----------|
| Source Type | ESI        | Ion Polarity         | Positive | Set Nebulizer    | 0.3 Bar   |
| Focus       | Not active |                      |          | Set Dry Heater   | 180 °C    |
| Scan Begin  | 50 m/z     | Set Capillary        | 4500 V   | Set Dry Gas      | 4.0 l/min |
| Scan End    | 4000 m/z   | Set End Plate Offset | -500 V   | Set Divert Valve | Waste     |



| Meas. m/z  | # | Ion Formula | m/z        | err  [mDa] | err [ppm] | Mean err [ppm] | rdb | N-Rule | e <sup>-</sup> Conf | mSigma |
|------------|---|-------------|------------|------------|-----------|----------------|-----|--------|---------------------|--------|
| 924.786901 | 1 | C56H102N5O5 | 924.787548 | 0.6        | 0.7       | 1.0            | 8.5 | ok     | even                | 8.3    |

**Fig. S43 HRMS Spectrum of compound 10 (C10,C16)**

BY7865 CT (3)-88 (53.4 mg, CDCl<sub>3</sub>)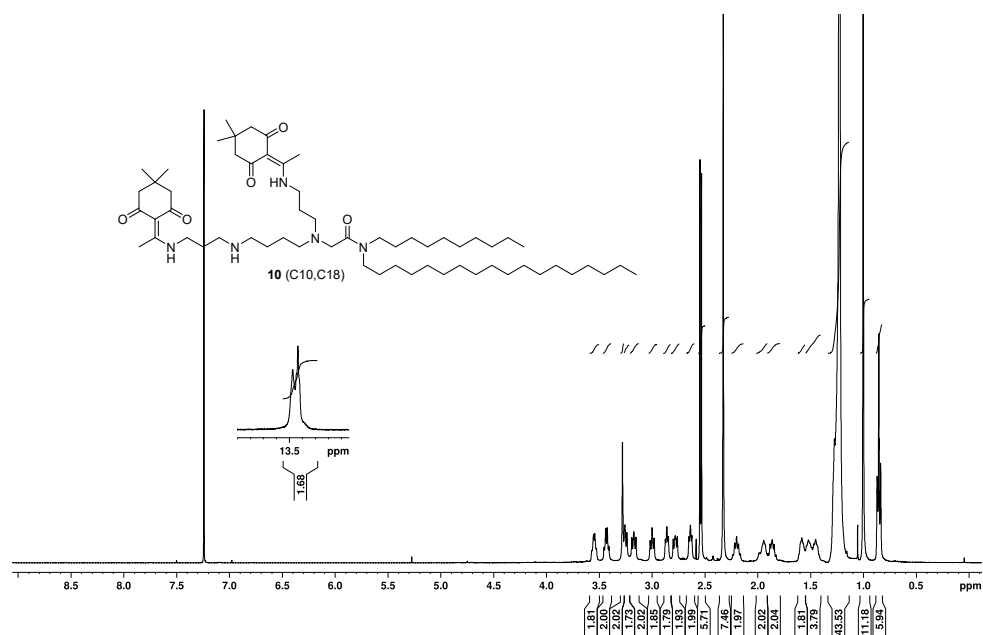

**Fig. S44** <sup>1</sup>H NMR Spectrum (400 MHz, CDCl<sub>3</sub>) of compound **10 (C10,C18)**

BY7865 CT (3)-88 (53.4 mg, CDCl<sub>3</sub>)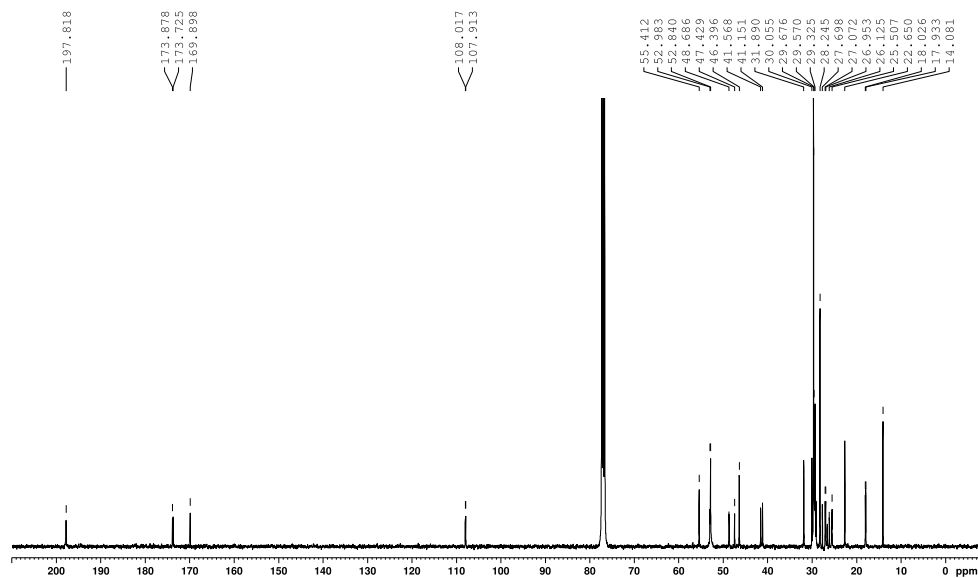

**Fig. S45** <sup>13</sup>C NMR Spectrum (100 MHz, CDCl<sub>3</sub>) of compound **10 (C10,C18)**

---

**Mass Spectrum SmartFormula Report**

---

**Analysis Info**

Analysis Name D:\Data\Boon-ek\ESI\BY-HRMS 1566 (pos).d  
Method tune\_wide\_wow 2-7-62.m  
Sample Name CT(3)-88  
Comment

Acquisition Date 12/27/2020 11:54:21 AM

Operator RU  
Instrument micrOTOF 8213750.10411

**Acquisition Parameter**

|             |            |                      |          |                  |           |
|-------------|------------|----------------------|----------|------------------|-----------|
| Source Type | ESI        | Ion Polarity         | Positive | Set Nebulizer    | 0.5 Bar   |
| Focus       | Not active |                      |          | Set Dry Heater   | 180 °C    |
| Scan Begin  | 50 m/z     | Set Capillary        | 4500 V   | Set Dry Gas      | 4.0 l/min |
| Scan End    | 3000 m/z   | Set End Plate Offset | -500 V   | Set Divert Valve | Waste     |

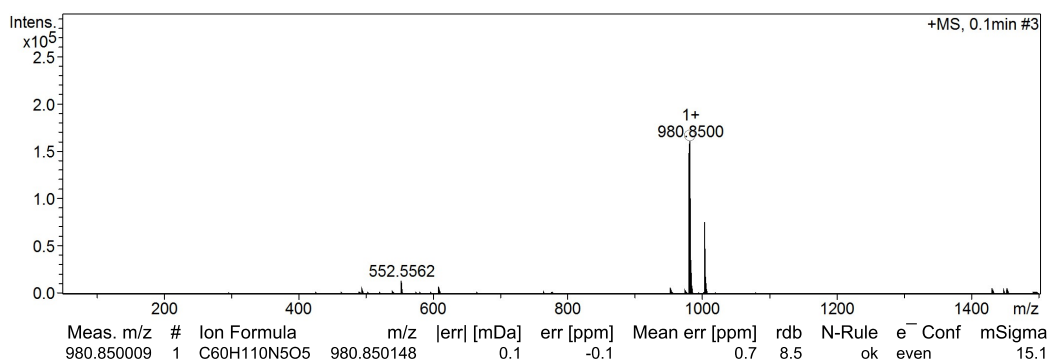**Fig. S46** HRMS Spectrum of compound **10** (C10,C18)

BY7866 CT(3)-89 (47.7 mg, CDCl<sub>3</sub>)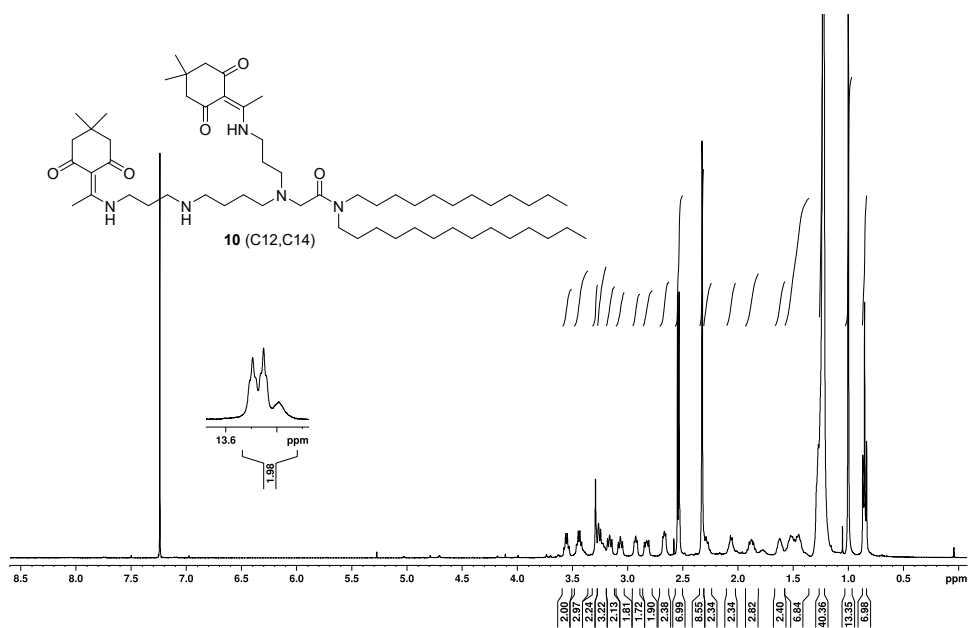Fig. S47 <sup>1</sup>H NMR Spectrum (400 MHz, CDCl<sub>3</sub>) of compound 10 (C12,C14)BY7866 CT(3)-89 (47.7 mg, CDCl<sub>3</sub>)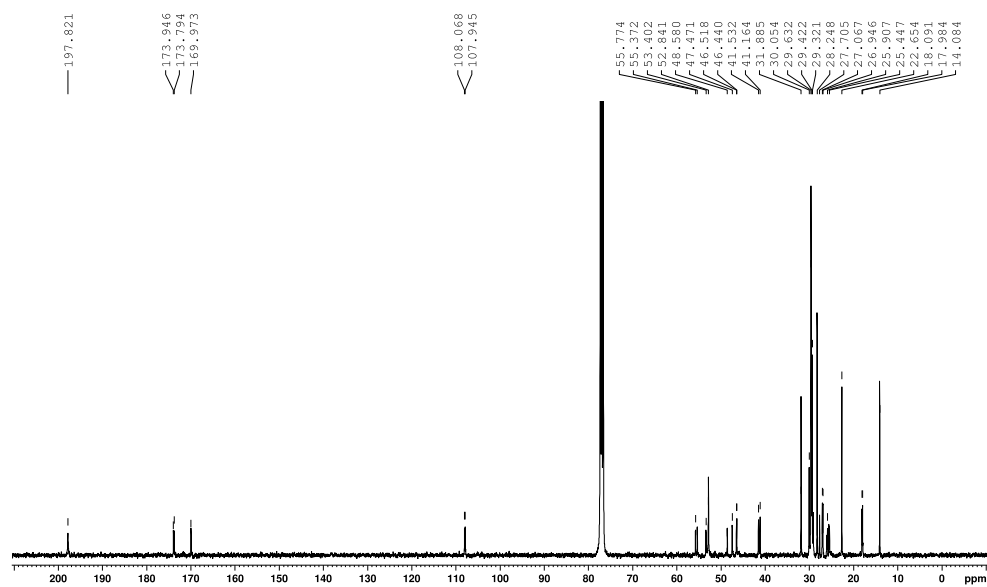Fig. S48 <sup>13</sup>C NMR Spectrum (100 MHz, CDCl<sub>3</sub>) of compound 10 (C12,C14)

---

**Mass Spectrum SmartFormula Report**

---

**Analysis Info**

Analysis Name D:\Data\Boon-ek\ESI\BY-HRMS 1527 (pos).d  
Method tune\_wide-RU.m  
Sample Name CT(3)-89  
Comment

Acquisition Date 12/22/2020 3:14:07 PM  
Operator RU  
Instrument micrOTOF 8213750.10411

**Acquisition Parameter**

|             |            |                      |          |                  |           |
|-------------|------------|----------------------|----------|------------------|-----------|
| Source Type | ESI        | Ion Polarity         | Positive | Set Nebulizer    | 0.3 Bar   |
| Focus       | Not active |                      |          | Set Dry Heater   | 180 °C    |
| Scan Begin  | 50 m/z     | Set Capillary        | 4500 V   | Set Dry Gas      | 4.0 l/min |
| Scan End    | 4000 m/z   | Set End Plate Offset | -500 V   | Set Divert Valve | Waste     |

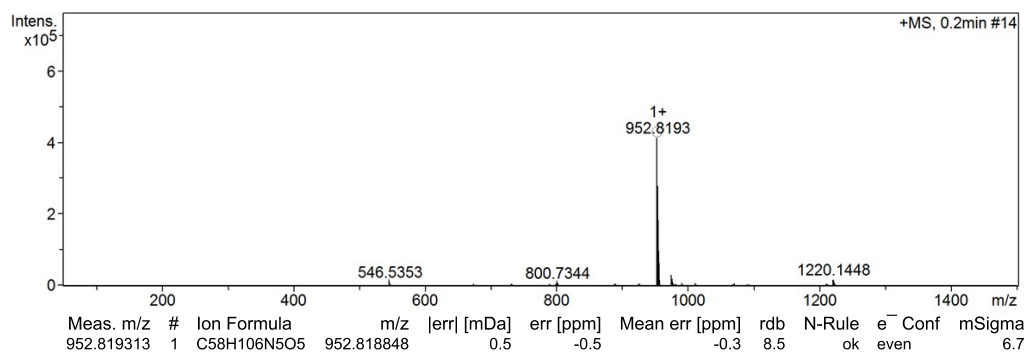**Fig. S49** HRMS Spectrum of compound **10 (C12,C14)**



BY7867 CT(3)-90 (53.2 mg, CDCl<sub>3</sub>)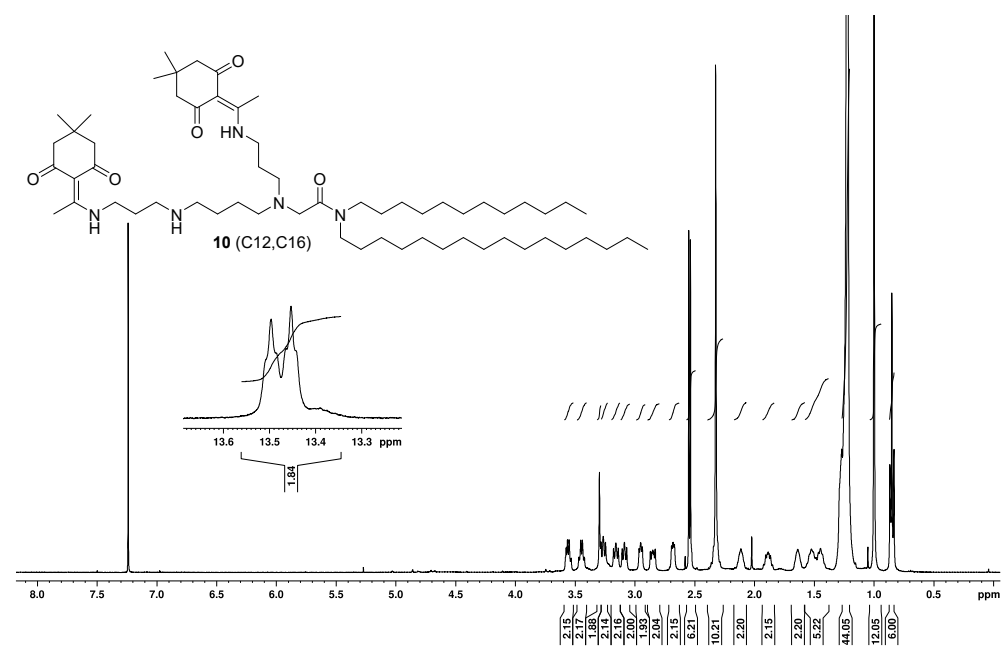

**Fig. S50** <sup>1</sup>H NMR Spectrum (400 MHz, CDCl<sub>3</sub>) of compound 10 (C12,C16)

BY7867 CT(3)-90 (53.2 mg, CDCl<sub>3</sub>)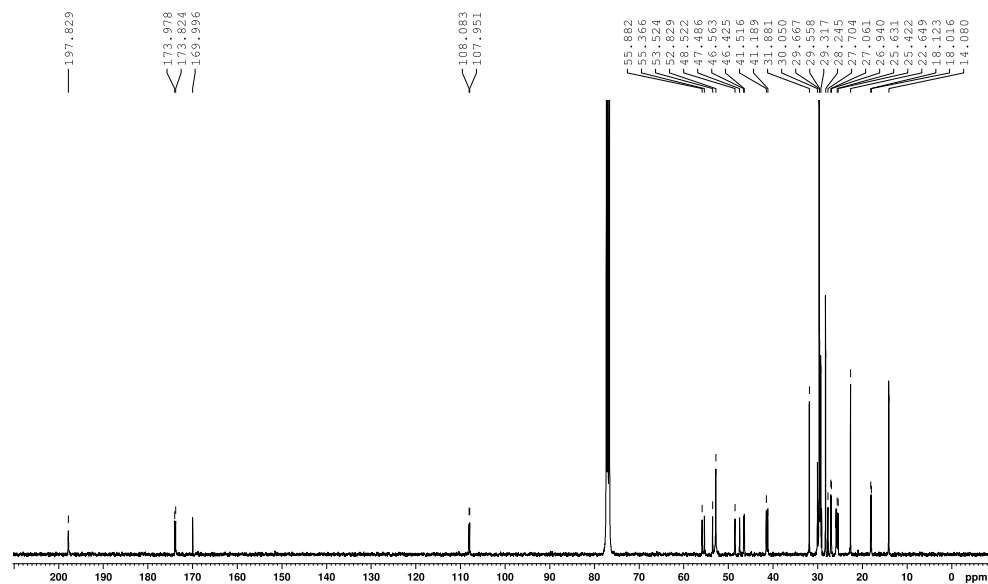

**Fig. S51** <sup>13</sup>C NMR Spectrum (100 MHz, CDCl<sub>3</sub>) of compound 10 (C12,C16)

---

**Mass Spectrum SmartFormula Report**

---

**Analysis Info**

Analysis Name D:\Data\Boon-ek\ESI\BY-HRMS 1527 (pos).d  
Method tune\_wide-RU.m  
Sample Name CT(3)-89  
Comment

Acquisition Date 12/22/2020 3:14:07 PM

Operator RU  
Instrument micrOTOF 8213750.10411

**Acquisition Parameter**

|             |            |                      |          |                  |           |
|-------------|------------|----------------------|----------|------------------|-----------|
| Source Type | ESI        | Ion Polarity         | Positive | Set Nebulizer    | 0.3 Bar   |
| Focus       | Not active |                      |          | Set Dry Heater   | 180 °C    |
| Scan Begin  | 50 m/z     | Set Capillary        | 4500 V   | Set Dry Gas      | 4.0 l/min |
| Scan End    | 4000 m/z   | Set End Plate Offset | -500 V   | Set Divert Valve | Waste     |

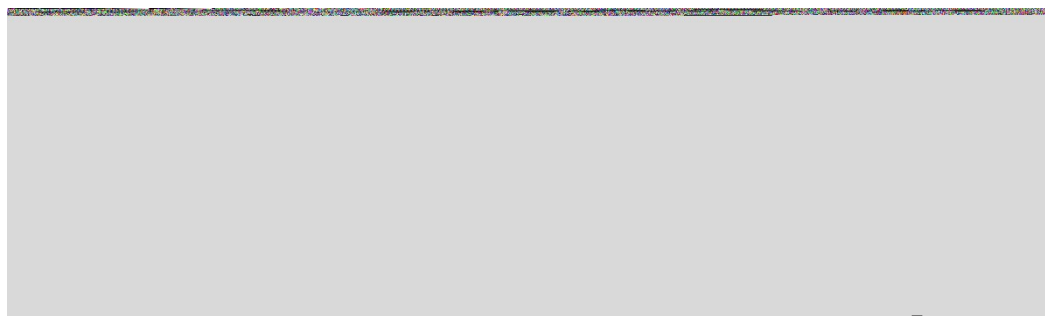

| Meas. m/z  | # | Ion Formula | m/z        | err  [mDa] | err [ppm] | Mean err [ppm] | rdb | N-Rule | e <sup>-</sup> Conf | mSigma |
|------------|---|-------------|------------|------------|-----------|----------------|-----|--------|---------------------|--------|
| 952.819313 | 1 | C58H106N5O5 | 952.818848 | 0.5        | -0.5      | -0.3           | 8.5 | ok     | even                | 6.7    |

**Fig. S52 HRMS Spectrum of compound 10 (C12,C16)**

BY7868 CT(3)-91 (51.2 mg, CDCl<sub>3</sub>)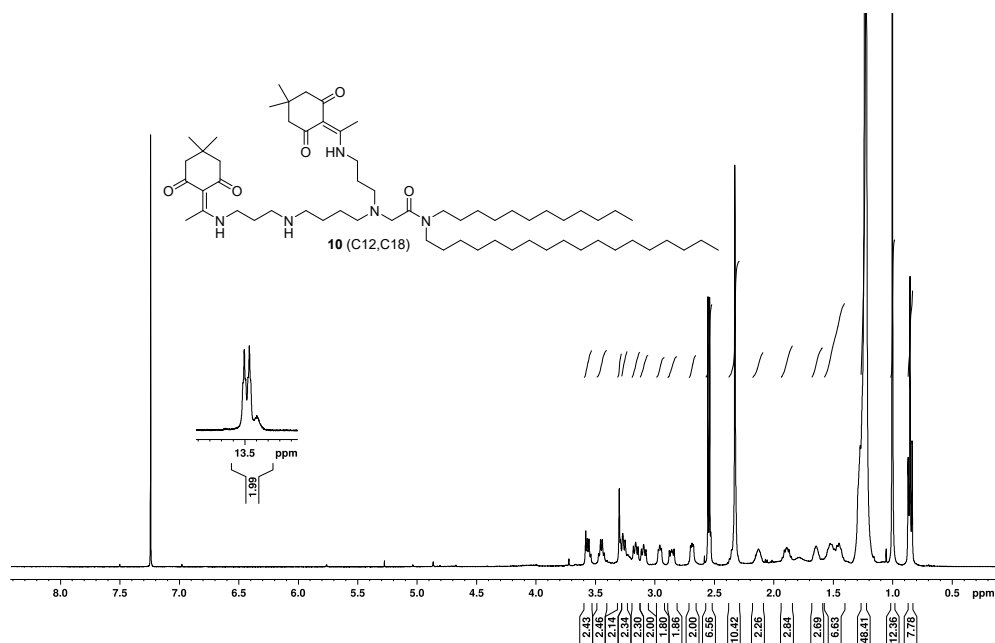

**Fig. S53** <sup>1</sup>H NMR Spectrum (400 MHz, CDCl<sub>3</sub>) of compound 10 (C12,C18)

BY7868 CT(3)-91 (51.2 mg, CDCl<sub>3</sub>)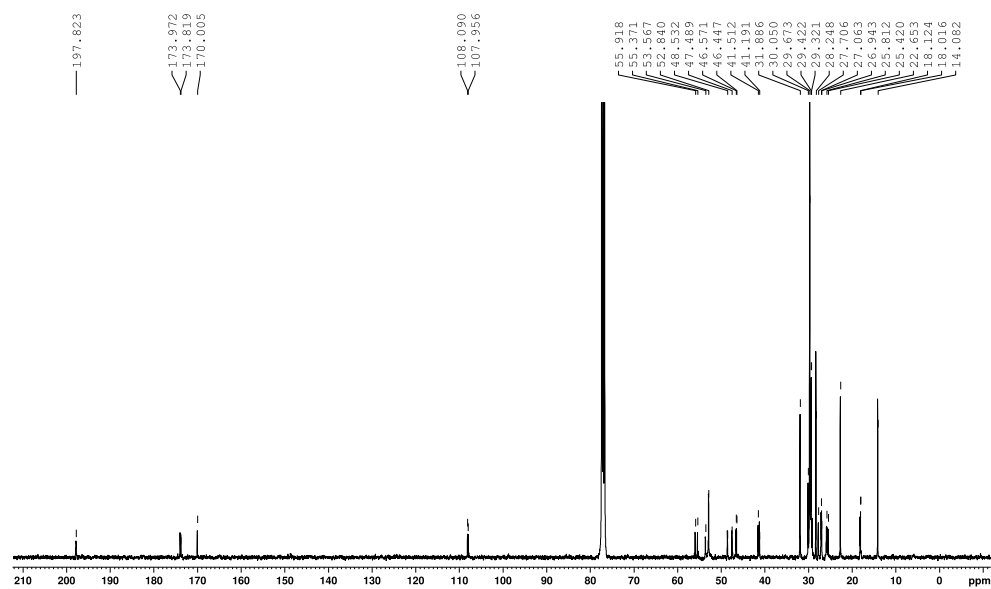

**Fig. S54** <sup>13</sup>C NMR Spectrum (100 MHz, CDCl<sub>3</sub>) of compound 10 (C12,C18)

---

**Mass Spectrum SmartFormula Report**


---

**Analysis Info**

Analysis Name D:\Data\Boon-ek\ESI\BY-HRMS 1529 (pos).d  
 Method tune\_wide-RU.m  
 Sample Name CT(3)-91  
 Comment

Acquisition Date 12/22/2020 3:16:25 PM

Operator RU  
 Instrument micrOTOF 8213750.10411

**Acquisition Parameter**

|             |            |                      |          |                  |           |
|-------------|------------|----------------------|----------|------------------|-----------|
| Source Type | ESI        | Ion Polarity         | Positive | Set Nebulizer    | 0.3 Bar   |
| Focus       | Not active |                      |          | Set Dry Heater   | 180 °C    |
| Scan Begin  | 50 m/z     | Set Capillary        | 4500 V   | Set Dry Gas      | 4.0 l/min |
| Scan End    | 4000 m/z   | Set End Plate Offset | -500 V   | Set Divert Valve | Waste     |

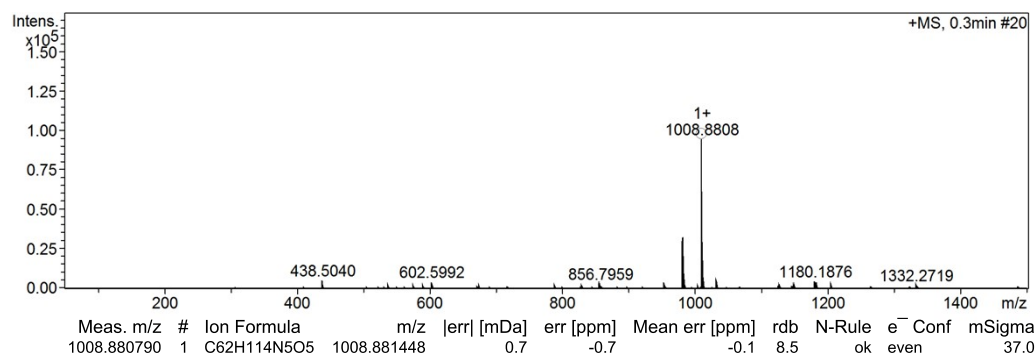

**Fig. S55 HRMS Spectrum of compound 10 (C12,C18)**

BY7869 CT(3)-92 (51.9 mg, CDCl<sub>3</sub>)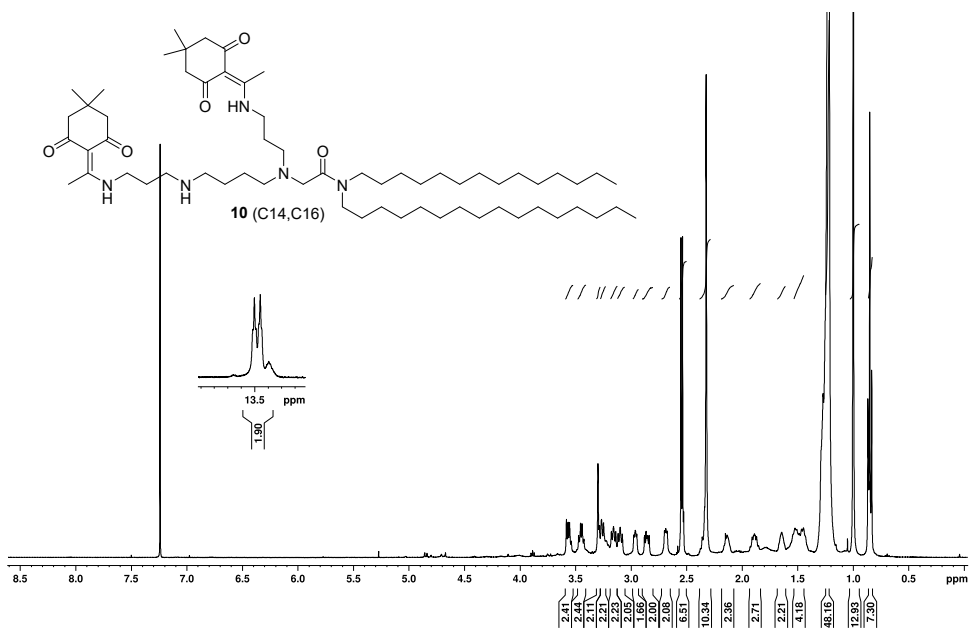

**Fig. S56** <sup>1</sup>H NMR Spectrum (400 MHz, CDCl<sub>3</sub>) of compound **10** (C14,C16)

BY7869 CT(3)-92 (51.9 mg, CDCl<sub>3</sub>)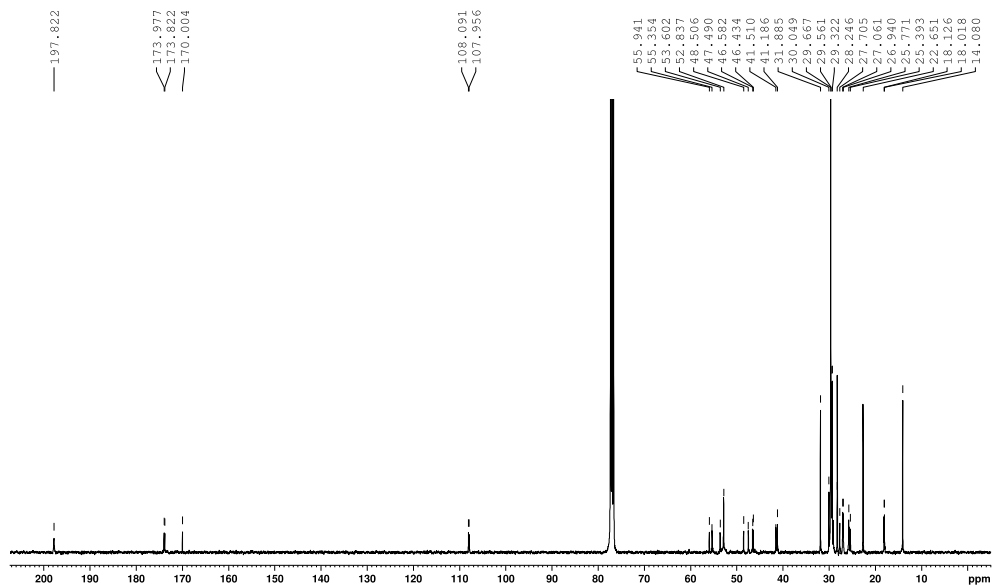

**Fig. S57** <sup>13</sup>C NMR Spectrum (100 MHz, CDCl<sub>3</sub>) of compound **10** (C14,C16)

---

**Mass Spectrum SmartFormula Report**

---

**Analysis Info**

Analysis Name D:\Data\Boon-ek\ESI\BY-HRMS 1530 (pos).d  
Method tune\_wide-RU.m  
Sample Name CT(3)-92  
Comment

Acquisition Date 12/22/2020 3:17:33 PM

Operator RU  
Instrument micrOTOF 8213750.10411

**Acquisition Parameter**

|             |            |                      |          |                  |           |
|-------------|------------|----------------------|----------|------------------|-----------|
| Source Type | ESI        | Ion Polarity         | Positive | Set Nebulizer    | 0.3 Bar   |
| Focus       | Not active |                      |          | Set Dry Heater   | 180 °C    |
| Scan Begin  | 50 m/z     | Set Capillary        | 4500 V   | Set Dry Gas      | 4.0 l/min |
| Scan End    | 4000 m/z   | Set End Plate Offset | -500 V   | Set Divert Valve | Waste     |

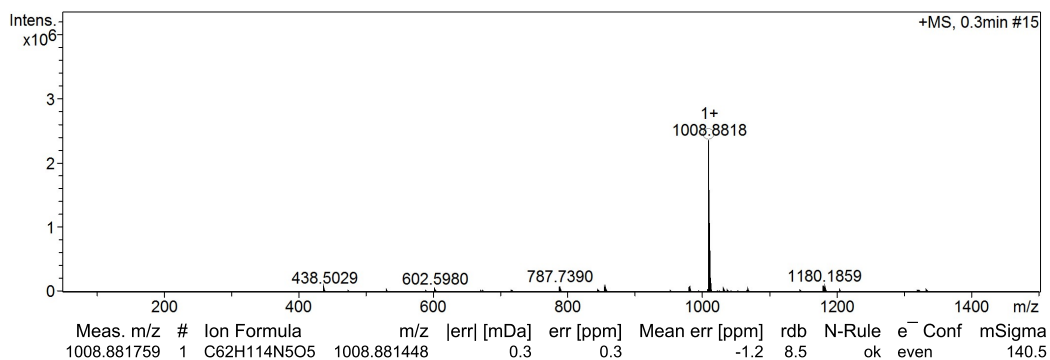**Fig. S58** HRMS Spectrum of compound **10** (C14,C16)



---

## Mass Spectrum SmartFormula Report

---

**Analysis Info**

Analysis Name D:\Data\Boon-ek\ESI\BY-HRMS 1531 (pos).d  
 Method tune\_wide-RU.m  
 Sample Name CT(3)-93  
 Comment

Acquisition Date 12/22/2020 3:20:54 PM

Operator RU  
 Instrument micrOTOF 8213750.10411

**Acquisition Parameter**

|             |            |                      |          |                  |           |
|-------------|------------|----------------------|----------|------------------|-----------|
| Source Type | ESI        | Ion Polarity         | Positive | Set Nebulizer    | 0.3 Bar   |
| Focus       | Not active |                      |          | Set Dry Heater   | 180 °C    |
| Scan Begin  | 50 m/z     | Set Capillary        | 4500 V   | Set Dry Gas      | 4.0 l/min |
| Scan End    | 4000 m/z   | Set End Plate Offset | -500 V   | Set Divert Valve | Waste     |

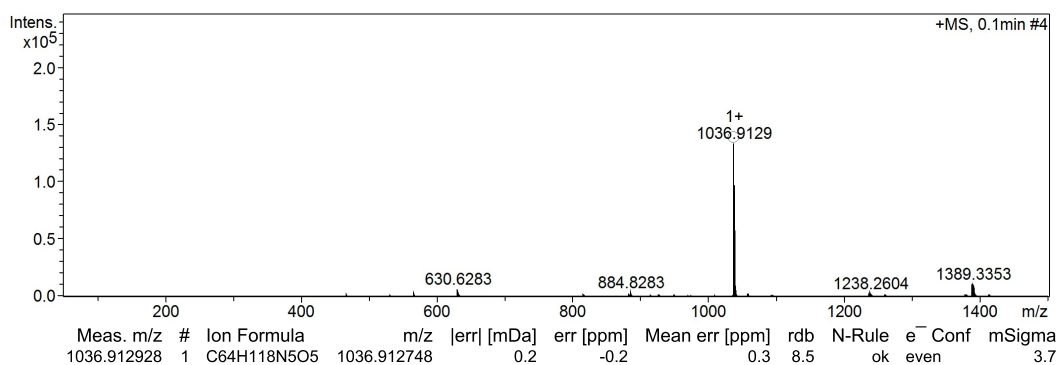

**Fig. S61** HRMS Spectrum of compound **10** (C<sub>14</sub>,C<sub>18</sub>)



BY7871 CT(3)-94 (51.9 mg, CDCl<sub>3</sub>)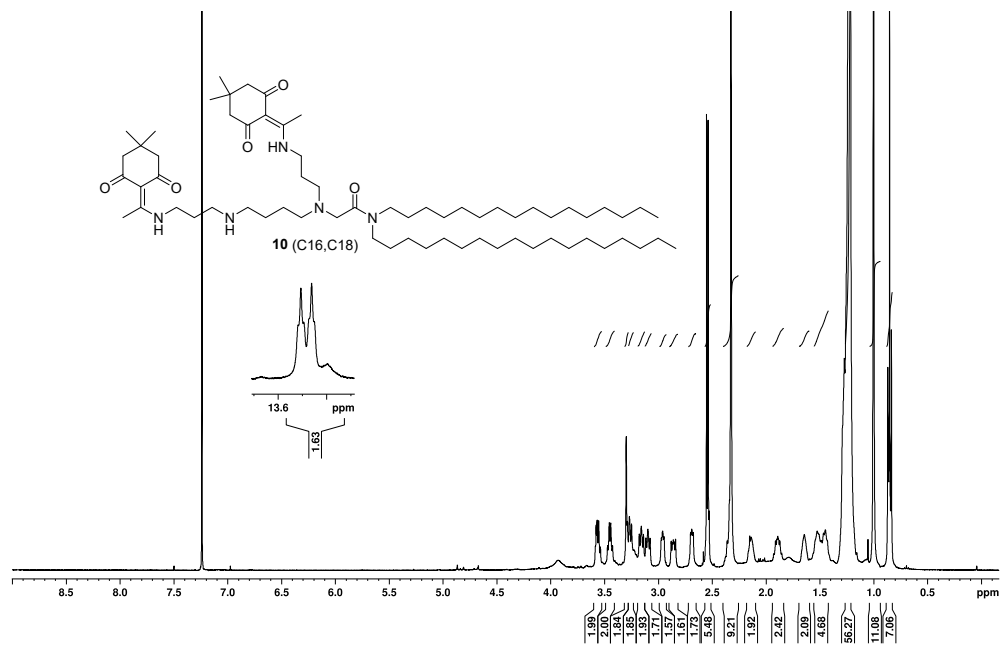

**Fig. S62** <sup>1</sup>H NMR Spectrum (400 MHz, CDCl<sub>3</sub>) of compound 10 (C16,C18)

BY7871 CT(3)-94 (51.9 mg, CDCl<sub>3</sub>)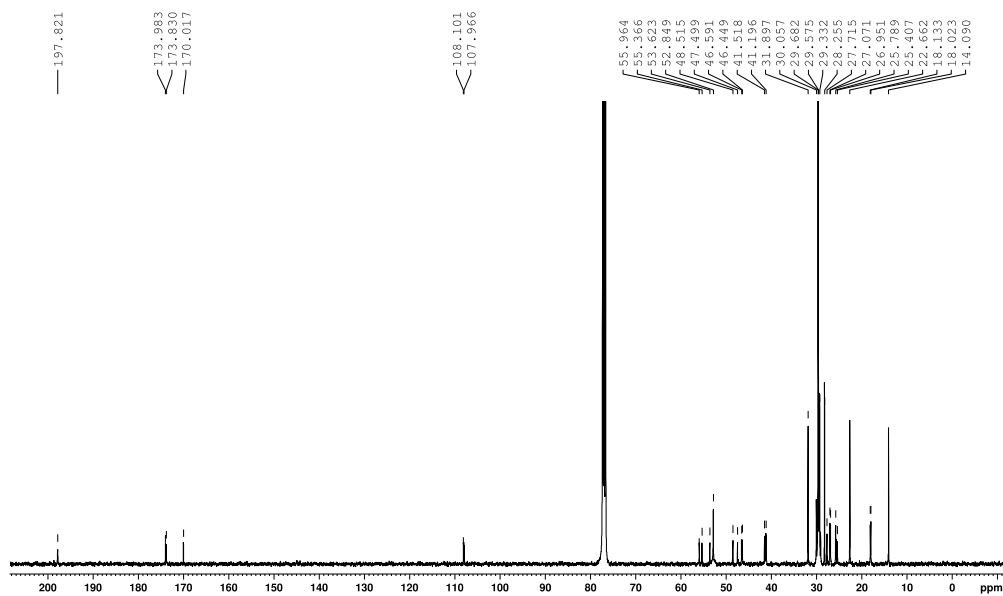

**Fig. S63** <sup>13</sup>C NMR Spectrum (100 MHz, CDCl<sub>3</sub>) of compound 10 (C16,C18)

---

**Mass Spectrum SmartFormula Report**

---

**Analysis Info**

Analysis Name D:\Data\Boon-ek\ESI\BY-HRMS 1532 (pos).d  
Method tune\_wide-RU.m  
Sample Name CT(3)-94  
Comment

Acquisition Date 12/22/2020 3:21:40 PM

Operator RU  
Instrument micrOTOF 8213750.10411

**Acquisition Parameter**

|             |            |                      |          |                  |           |
|-------------|------------|----------------------|----------|------------------|-----------|
| Source Type | ESI        | Ion Polarity         | Positive | Set Nebulizer    | 0.3 Bar   |
| Focus       | Not active |                      |          | Set Dry Heater   | 180 °C    |
| Scan Begin  | 50 m/z     | Set Capillary        | 4500 V   | Set Dry Gas      | 4.0 l/min |
| Scan End    | 4000 m/z   | Set End Plate Offset | -500 V   | Set Divert Valve | Waste     |

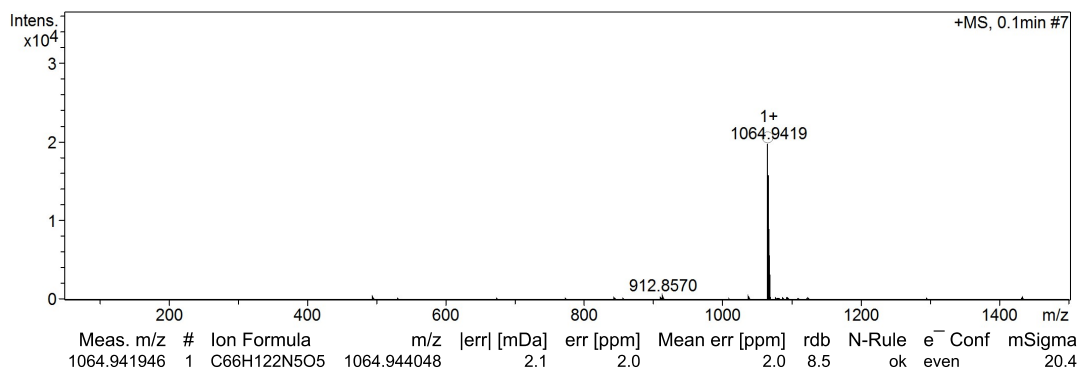**Fig. S64 HRMS Spectrum of compound 10 (C16,C18)**

BY8133 CT(3)-95 (24.9 mg, CDCl<sub>3</sub>)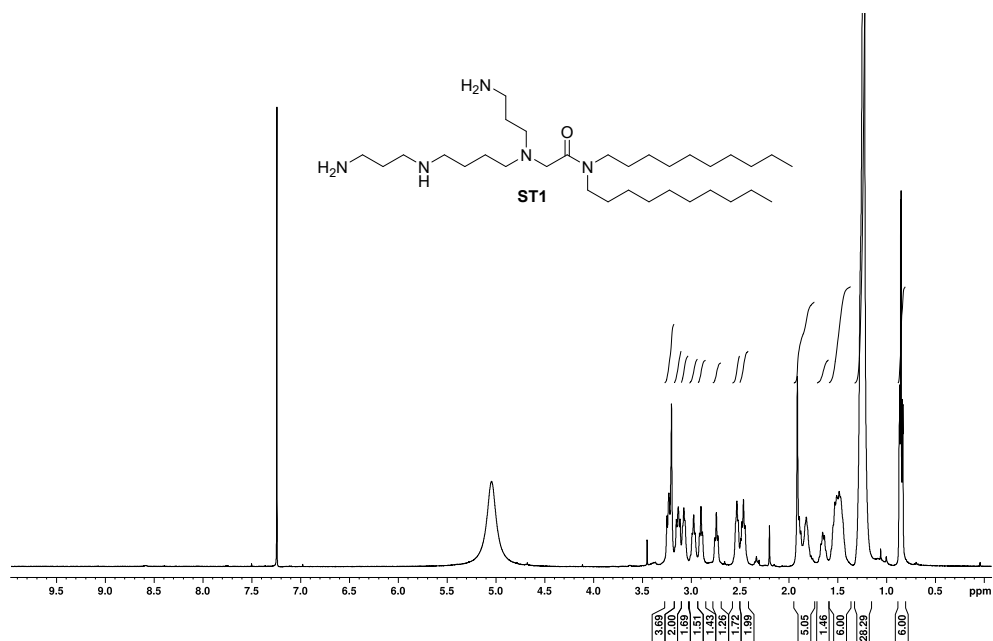BY8133 CT(3)-95 (24.9 mg, CDCl<sub>3</sub>)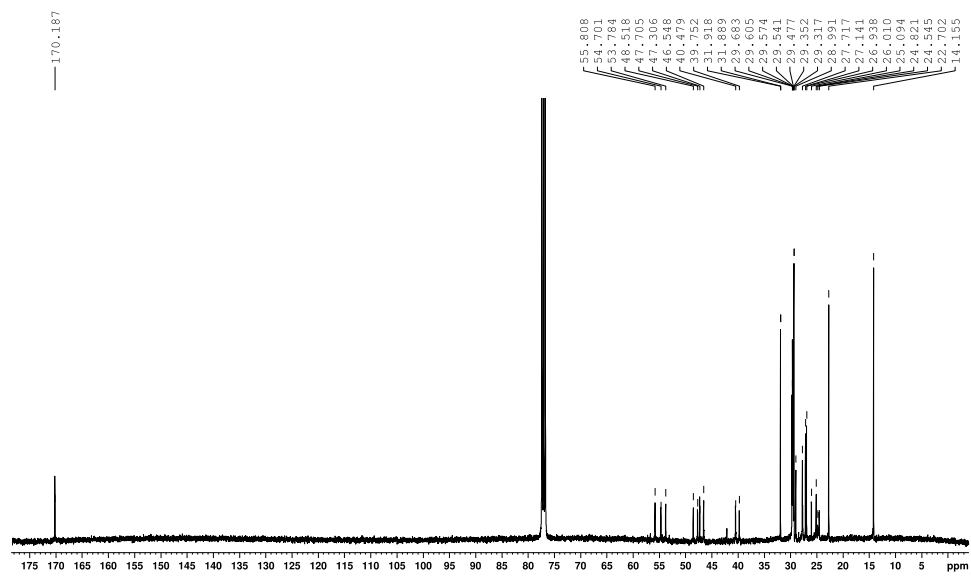

---

**Mass Spectrum SmartFormula Report**


---

**Analysis Info**

Analysis Name D:\Data\Boon-ek\ESI\BY-HRMS 1560 (pos).d  
 Method tune\_wide\_wow 2-7-62.m  
 Sample Name CT(3)-95  
 Comment

Acquisition Date 12/25/2020 2:52:07 PM

Operator RU  
 Instrument micrOTOF 8213750.10411

**Acquisition Parameter**

|             |            |                      |          |                  |           |
|-------------|------------|----------------------|----------|------------------|-----------|
| Source Type | ESI        | Ion Polarity         | Positive | Set Nebulizer    | 0.5 Bar   |
| Focus       | Not active |                      |          | Set Dry Heater   | 180 °C    |
| Scan Begin  | 50 m/z     | Set Capillary        | 4500 V   | Set Dry Gas      | 4.0 l/min |
| Scan End    | 3000 m/z   | Set End Plate Offset | -500 V   | Set Divert Valve | Waste     |

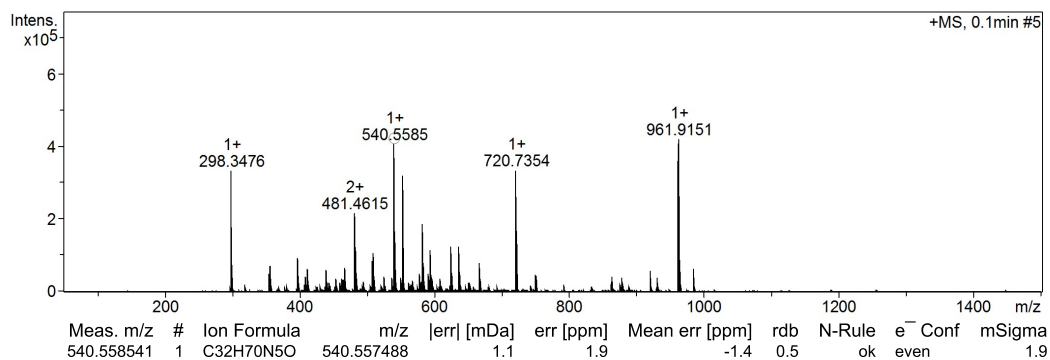**Fig. S67HRMS Spectrum of lipid ST1**

BY8042 CT(3)-96 (39.4 mg, CDCl<sub>3</sub>)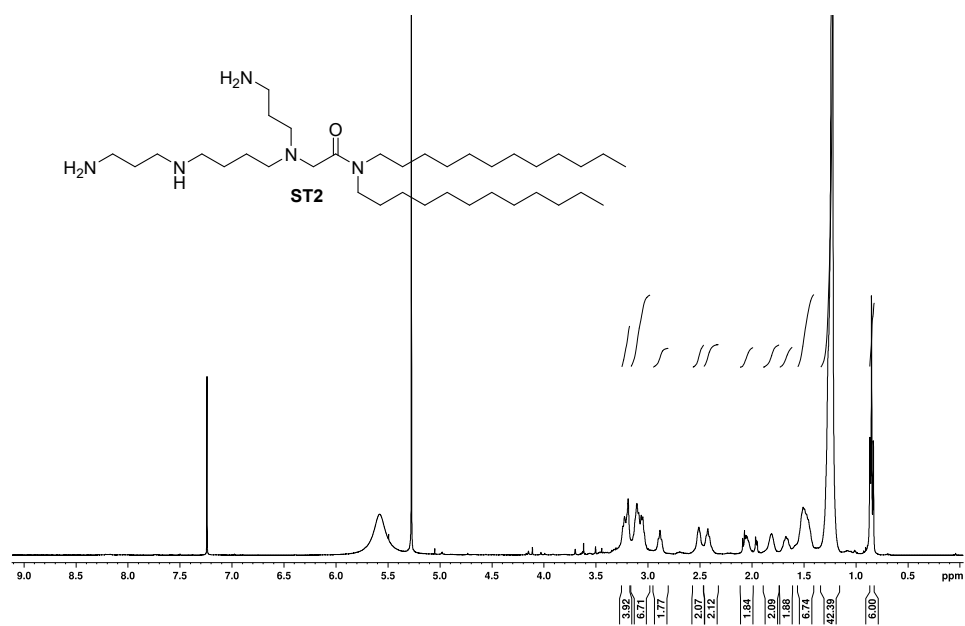**Fig. S68** <sup>1</sup>H NMR Spectrum (400 MHz, CDCl<sub>3</sub>) of lipid ST2BY8042 CT(3)-96 (39.4 mg, CDCl<sub>3</sub>)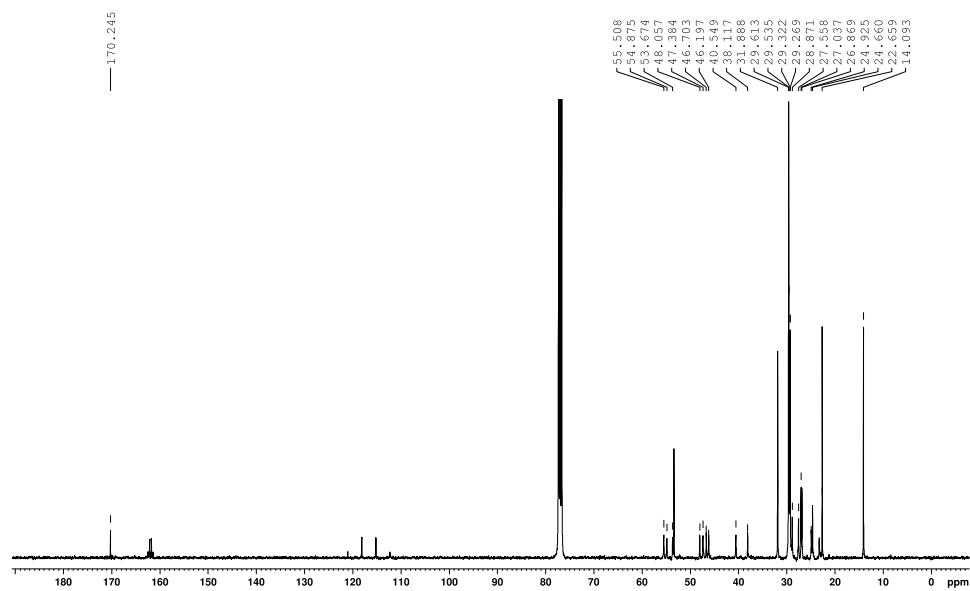**Fig. S69** <sup>13</sup>C NMR Spectrum (100 MHz, CDCl<sub>3</sub>) of lipid ST2

---

**Mass Spectrum SmartFormula Report**


---

**Analysis Info**

Analysis Name D:\Data\Boon-ek\ESI\BY-HRMS 1561 (pos).d  
 Method tune\_wide\_wow 2-7-62.m  
 Sample Name CT(3)-96  
 Comment

Acquisition Date 12/25/2020 2:52:59 PM

Operator RU  
 Instrument micrOTOF 8213750.10411

**Acquisition Parameter**

|             |            |                      |          |                  |           |
|-------------|------------|----------------------|----------|------------------|-----------|
| Source Type | ESI        | Ion Polarity         | Positive | Set Nebulizer    | 0.5 Bar   |
| Focus       | Not active |                      |          | Set Dry Heater   | 180 °C    |
| Scan Begin  | 50 m/z     | Set Capillary        | 4500 V   | Set Dry Gas      | 4.0 l/min |
| Scan End    | 3000 m/z   | Set End Plate Offset | -500 V   | Set Divert Valve | Waste     |

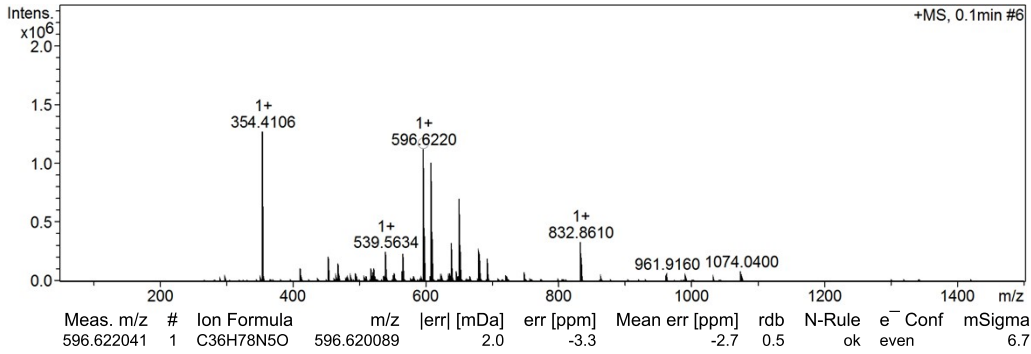**Fig. S70** HRMS Spectrum of lipid **ST2**



---

**Mass Spectrum SmartFormula Report**

---

**Analysis Info**

Analysis Name D:\Data\Boon-ek\ESI\BY-HRMS 1561 (pos).d  
Method tune\_wide\_wow 2-7-62.m  
Sample Name CT(3)-96  
Comment

Acquisition Date 12/25/2020 2:52:59 PM  
Operator RU  
Instrument micrOTOF 8213750.10411

**Acquisition Parameter**

|             |            |                      |          |                  |           |
|-------------|------------|----------------------|----------|------------------|-----------|
| Source Type | ESI        | Ion Polarity         | Positive | Set Nebulizer    | 0.5 Bar   |
| Focus       | Not active |                      |          | Set Dry Heater   | 180 °C    |
| Scan Begin  | 50 m/z     | Set Capillary        | 4500 V   | Set Dry Gas      | 4.0 l/min |
| Scan End    | 3000 m/z   | Set End Plate Offset | -500 V   | Set Divert Valve | Waste     |

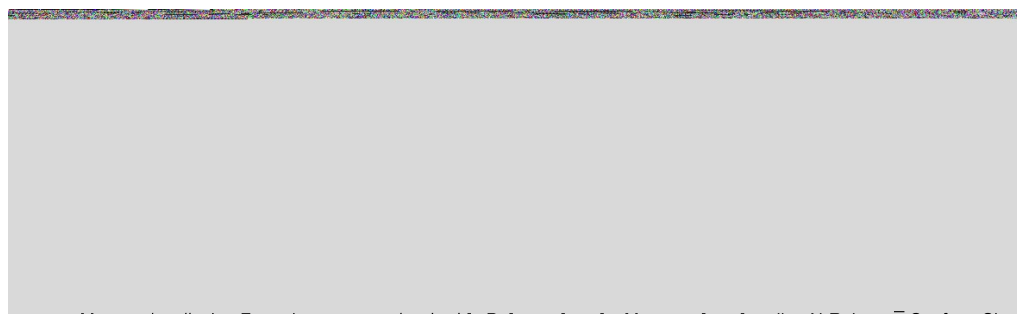

| Meas. m/z  | # | Ion Formula | m/z        | err  [mDa] | err [ppm] | Mean err [ppm] | rdb | N-Rule | e <sup>-</sup> Conf | mSigma |
|------------|---|-------------|------------|------------|-----------|----------------|-----|--------|---------------------|--------|
| 596.622041 | 1 | C36H78N5O   | 596.620089 | 2.0        | -3.3      | -2.7           | 0.5 | ok     | even                | 6.7    |

**Fig. S73 HRMS Spectrum of lipid ST3**





---

**Mass Spectrum SmartFormula Report**

---

**Analysis Info**

Analysis Name D:\Data\Boon-ek\ESI\BY-HRMS 1500 (pos).d  
Method tune\_wide(pos).m  
Sample Name CT(3)-98  
Comment

Acquisition Date 12/15/2020 3:31:15 PM

Operator RU  
Instrument micrOTOF 8213750.10411

**Acquisition Parameter**

|             |            |                      |          |                  |           |
|-------------|------------|----------------------|----------|------------------|-----------|
| Source Type | ESI        | Ion Polarity         | Positive | Set Nebulizer    | 0.3 Bar   |
| Focus       | Not active |                      |          | Set Dry Heater   | 180 °C    |
| Scan Begin  | 100 m/z    | Set Capillary        | 4500 V   | Set Dry Gas      | 4.0 l/min |
| Scan End    | 4000 m/z   | Set End Plate Offset | -500 V   | Set Divert Valve | Waste     |

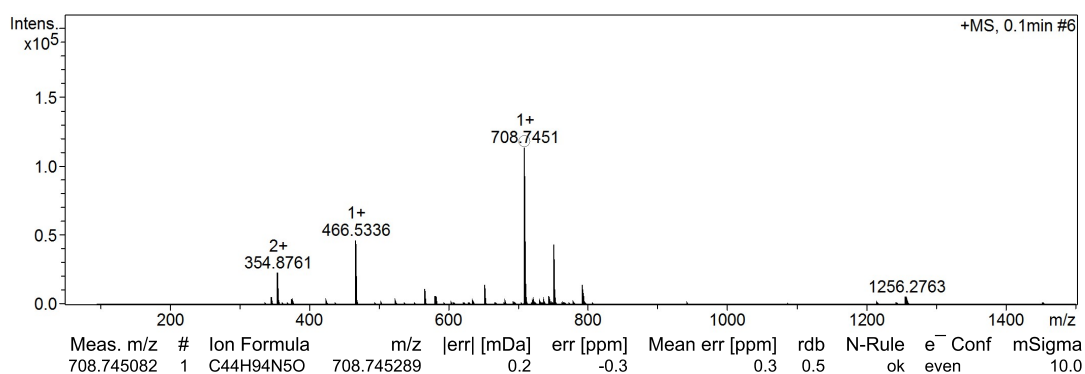**Fig. S76** HRMS Spectrum of lipid **ST4**

BY8135 CT(3)-99 (58.2 mg, CDCl<sub>3</sub>)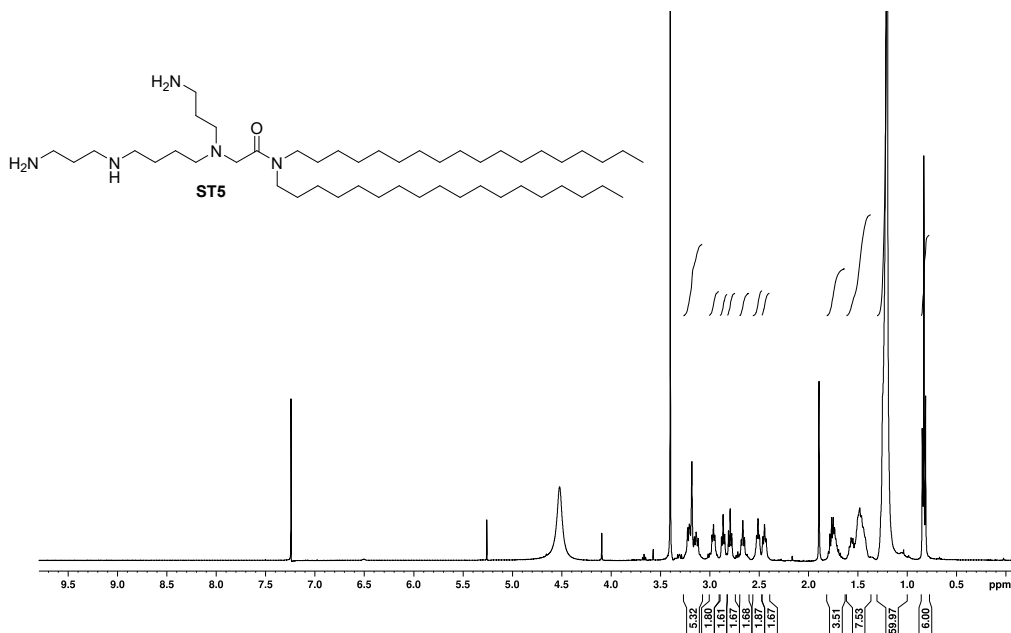**Fig. S77** <sup>1</sup>H NMR Spectrum (400 MHz, CDCl<sub>3</sub>) of lipid **ST5**BY8135 CT(3)-99 (58.2 mg, CDCl<sub>3</sub>)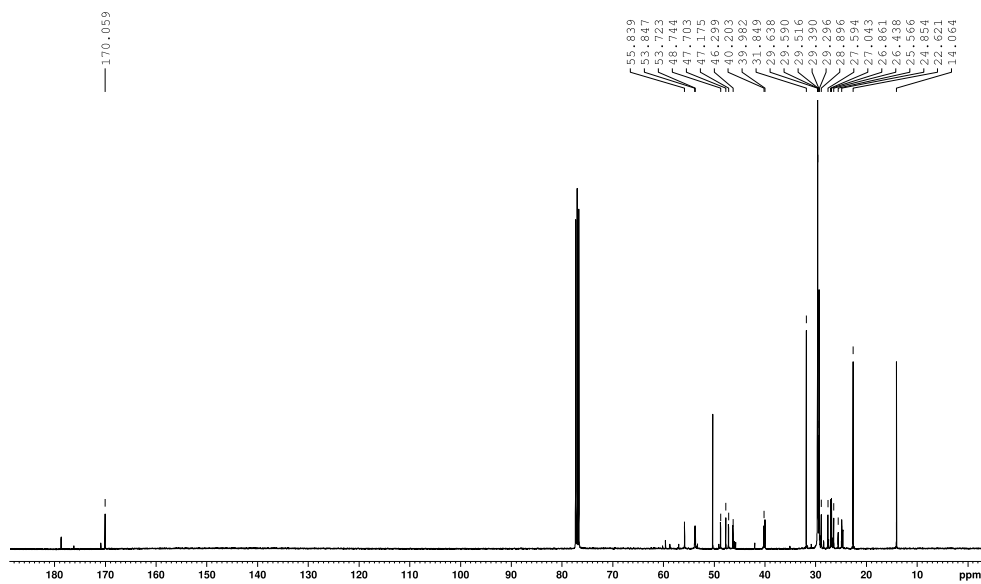**Fig. S78** <sup>13</sup>C NMR Spectrum (100 MHz, CDCl<sub>3</sub>) of lipid **ST5**

---

**Mass Spectrum SmartFormula Report**

---

**Analysis Info**

Analysis Name D:\Data\Boon-ek\ESI\BY-HRMS 1563 (pos).d  
Method tune\_wide\_wow 2-7-62.m  
Sample Name CT(3)-99  
Comment

Acquisition Date 12/25/2020 2:56:35 PM  
Operator RU  
Instrument micrOTOF 8213750.10411

**Acquisition Parameter**

|             |            |                      |          |                  |           |
|-------------|------------|----------------------|----------|------------------|-----------|
| Source Type | ESI        | Ion Polarity         | Positive | Set Nebulizer    | 0.5 Bar   |
| Focus       | Not active |                      |          | Set Dry Heater   | 180 °C    |
| Scan Begin  | 50 m/z     | Set Capillary        | 4500 V   | Set Dry Gas      | 4.0 l/min |
| Scan End    | 3000 m/z   | Set End Plate Offset | -500 V   | Set Divert Valve | Waste     |

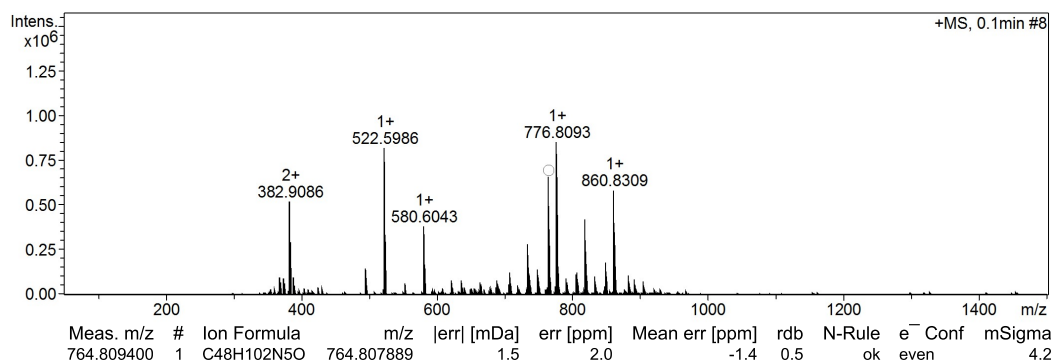**Fig. S79** HRMS Spectrum of lipid **ST5**

BY8136 CT(3)-100 (43.6 mg, CDCl<sub>3</sub>)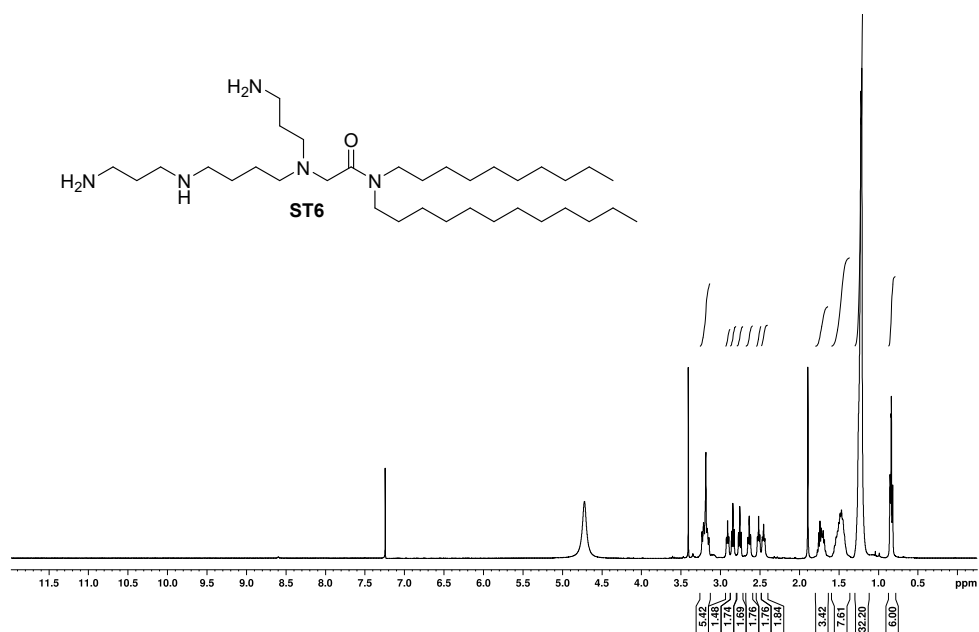Fig. S80 <sup>1</sup>H NMR Spectrum (400 MHz, CDCl<sub>3</sub>) of lipid ST6BY8136 CT(3)-100 (43.6 mg, CDCl<sub>3</sub>)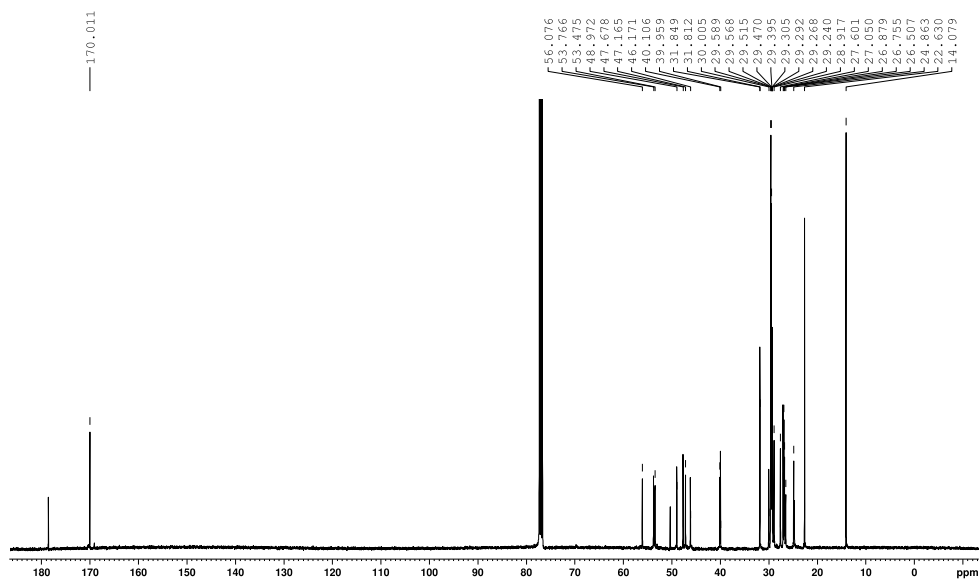Fig. S81 <sup>13</sup>C NMR Spectrum (100 MHz, CDCl<sub>3</sub>) of lipid ST6

---

**Mass Spectrum SmartFormula Report**


---

**Analysis Info**

Analysis Name D:\Data\Boon-ek\ESI\BY-HRMS 1564 (pos).d  
 Method tune\_wide\_wow 2-7-62.m  
 Sample Name CT(3)-100  
 Comment

Acquisition Date 12/25/2020 2:58:39 PM

Operator RU  
 Instrument micrOTOF 8213750.10411

**Acquisition Parameter**

|             |            |                      |          |                  |           |
|-------------|------------|----------------------|----------|------------------|-----------|
| Source Type | ESI        | Ion Polarity         | Positive | Set Nebulizer    | 0.5 Bar   |
| Focus       | Not active |                      |          | Set Dry Heater   | 180 °C    |
| Scan Begin  | 50 m/z     | Set Capillary        | 4500 V   | Set Dry Gas      | 4.0 l/min |
| Scan End    | 3000 m/z   | Set End Plate Offset | -500 V   | Set Divert Valve | Waste     |

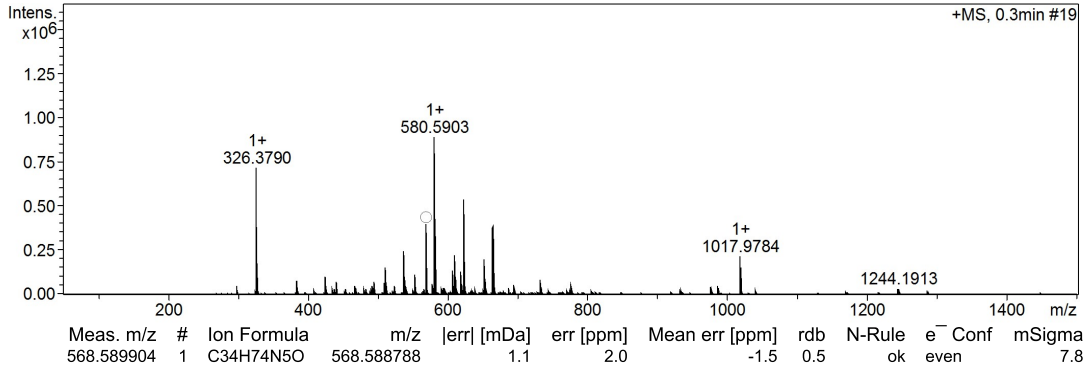**Fig. S82** HRMS Spectrum of lipid **ST6**

BY8055 CT(3)-101 (40.6 mg, CDCl<sub>3</sub>)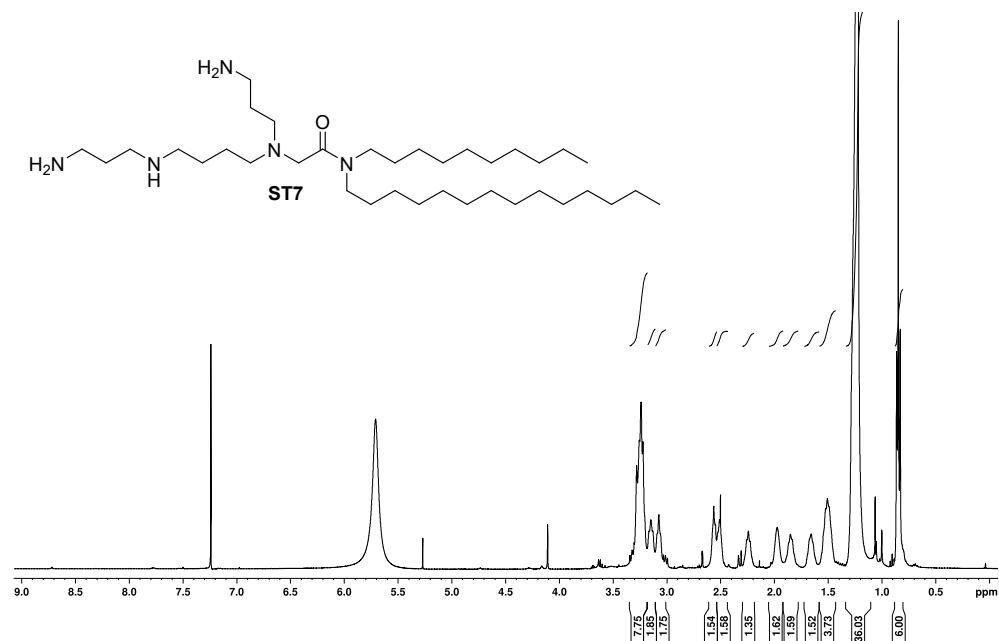**Fig. S83** <sup>1</sup>H NMR Spectrum (400 MHz, CDCl<sub>3</sub>) of lipid ST7BY8055 CT(3)-101 (40.6 mg, CDCl<sub>3</sub>)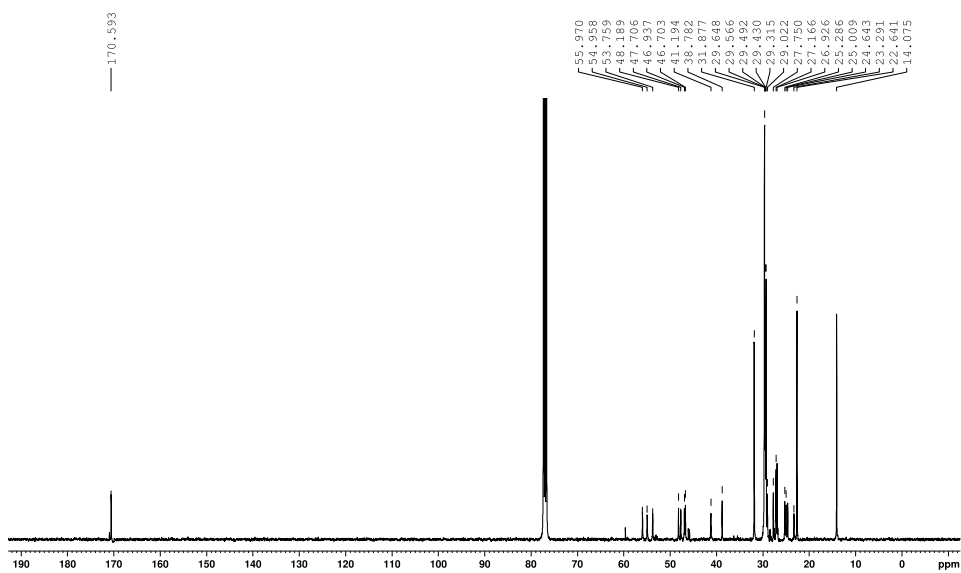**Fig. S84** <sup>13</sup>C NMR Spectrum (100 MHz, CDCl<sub>3</sub>) of lipid ST7

---

**Mass Spectrum SmartFormula Report**

---

**Analysis Info**

Analysis Name D:\Data\Boon-ek\ESI\BY-HRMS 1565 (pos).d  
Method tune\_wide\_wow 2-7-62.m  
Sample Name CT(3)-101  
Comment

Acquisition Date 12/25/2020 2:59:40 PM

Operator RU  
Instrument micrOTOF 8213750.10411

**Acquisition Parameter**

|             |            |                      |          |                  |           |
|-------------|------------|----------------------|----------|------------------|-----------|
| Source Type | ESI        | Ion Polarity         | Positive | Set Nebulizer    | 0.5 Bar   |
| Focus       | Not active |                      |          | Set Dry Heater   | 180 °C    |
| Scan Begin  | 50 m/z     | Set Capillary        | 4500 V   | Set Dry Gas      | 4.0 l/min |
| Scan End    | 3000 m/z   | Set End Plate Offset | -500 V   | Set Divert Valve | Waste     |

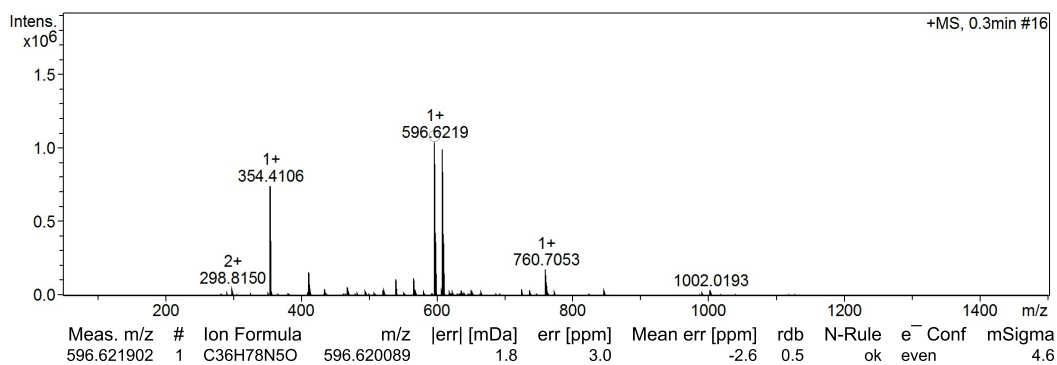**Fig. S85** HRMS Spectrum of lipid **ST7**



BY8056 CT(3)-102 (40.9 mg, CDCl<sub>3</sub>)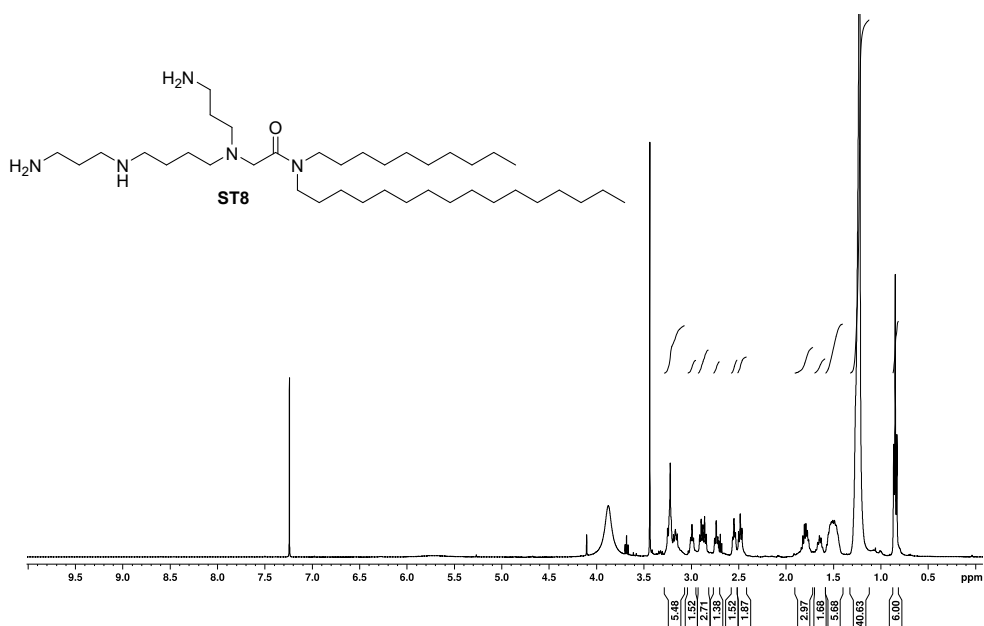**Fig. S86** <sup>1</sup>H NMR Spectrum (400 MHz, CDCl<sub>3</sub>) of lipid ST8BY8056 CT(3)-102 (40.9 mg, CDCl<sub>3</sub>)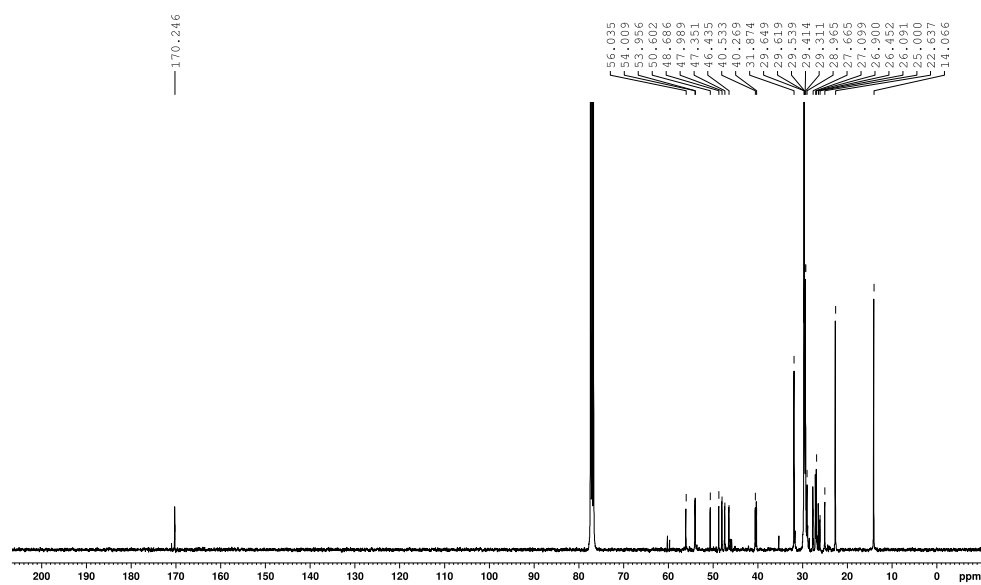**Fig. S87** <sup>13</sup>C NMR Spectrum (100 MHz, CDCl<sub>3</sub>) of lipid ST8

---

**Mass Spectrum SmartFormula Report**


---

**Analysis Info**

Analysis Name D:\Data\Boon-ek\ESI\BY-HRMS 1567 (pos).d  
 Method tune\_wide\_wow 2-7-62.m  
 Sample Name CT(3)-102  
 Comment

Acquisition Date 12/27/2020 11:55:16 AM

Operator RU  
 Instrument micrOTOF 8213750.10411

**Acquisition Parameter**

|             |            |                      |          |                  |           |
|-------------|------------|----------------------|----------|------------------|-----------|
| Source Type | ESI        | Ion Polarity         | Positive | Set Nebulizer    | 0.5 Bar   |
| Focus       | Not active |                      |          | Set Dry Heater   | 180 °C    |
| Scan Begin  | 50 m/z     | Set Capillary        | 4500 V   | Set Dry Gas      | 4.0 l/min |
| Scan End    | 3000 m/z   | Set End Plate Offset | -500 V   | Set Divert Valve | Waste     |

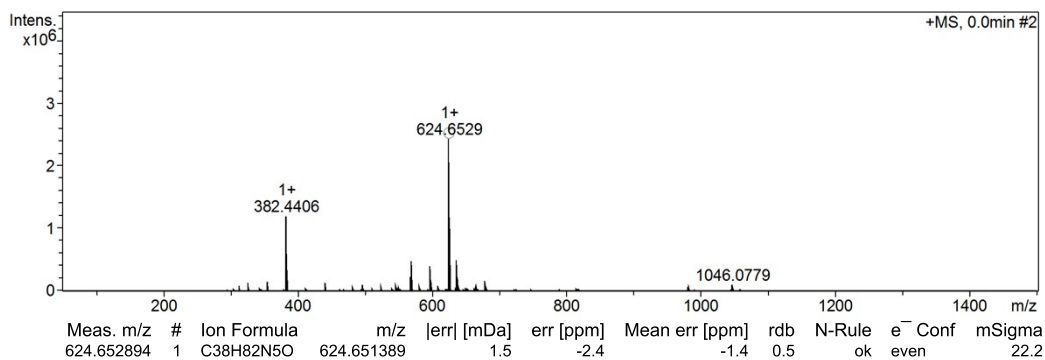**Fig. S88** HRMS Spectrum of lipid **ST8**

BY8075 CT(3)-103 (60.1 mg, CDCl<sub>3</sub>)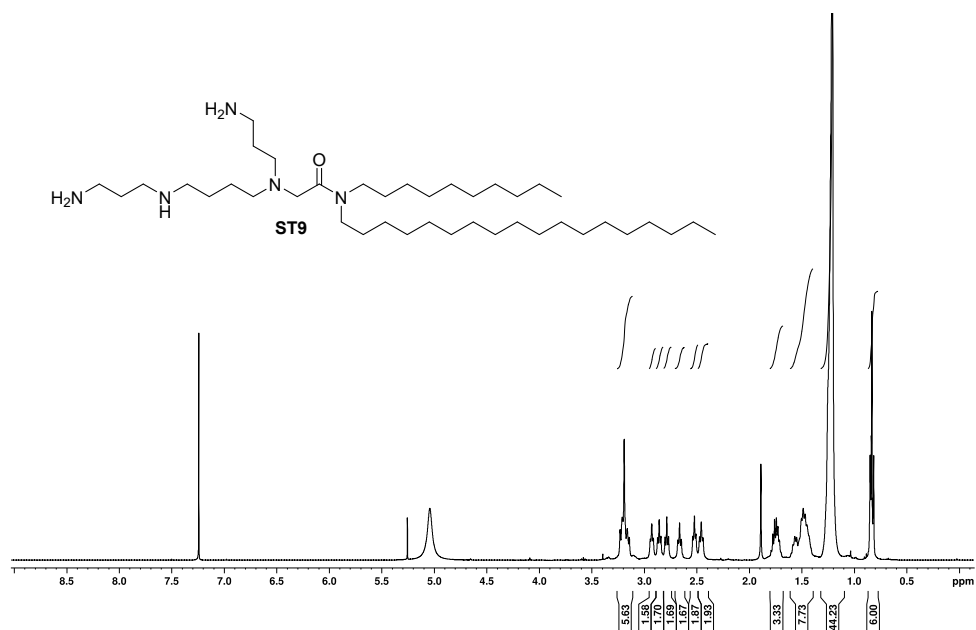**Fig. S89** <sup>1</sup>H NMR Spectrum (400 MHz, CDCl<sub>3</sub>) of lipid ST9BY8075 CT(3)-103 (60.1 mg, CDCl<sub>3</sub>)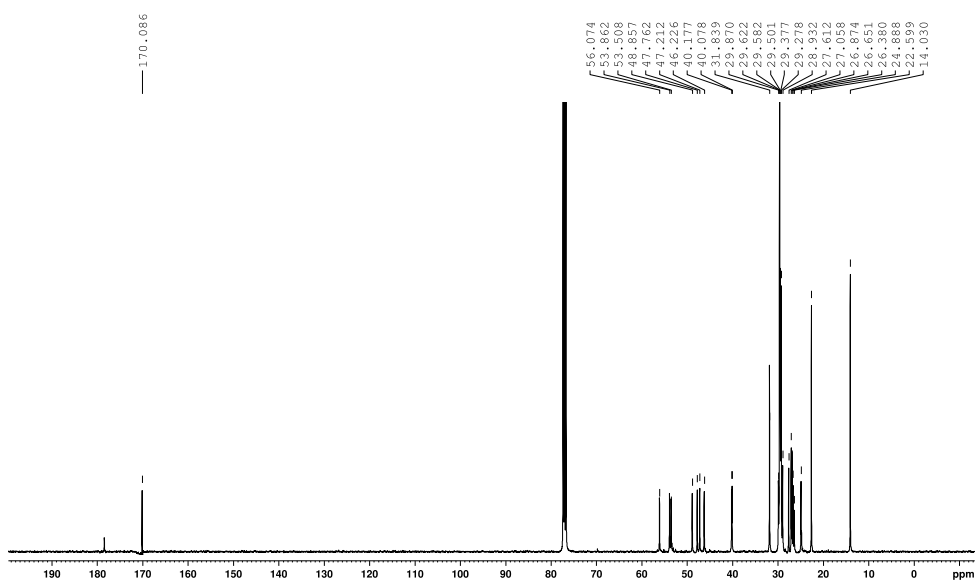**Fig. S90** <sup>13</sup>C NMR Spectrum (100 MHz, CDCl<sub>3</sub>) of lipid ST9

---

**Mass Spectrum SmartFormula Report**


---

**Analysis Info**

Analysis Name D:\Data\Boon-ek\ESI\BY-HRMS 1568 (pos).d  
 Method tune\_wide\_wow 2-7-62.m  
 Sample Name CT(3)-103  
 Comment

Acquisition Date 12/27/2020 11:56:34 AM

Operator RU  
 Instrument micrOTOF 8213750.10411

---

**Acquisition Parameter**

|             |            |                      |          |                  |           |
|-------------|------------|----------------------|----------|------------------|-----------|
| Source Type | ESI        | Ion Polarity         | Positive | Set Nebulizer    | 0.5 Bar   |
| Focus       | Not active |                      |          | Set Dry Heater   | 180 °C    |
| Scan Begin  | 50 m/z     | Set Capillary        | 4500 V   | Set Dry Gas      | 4.0 l/min |
| Scan End    | 3000 m/z   | Set End Plate Offset | -500 V   | Set Divert Valve | Waste     |

---

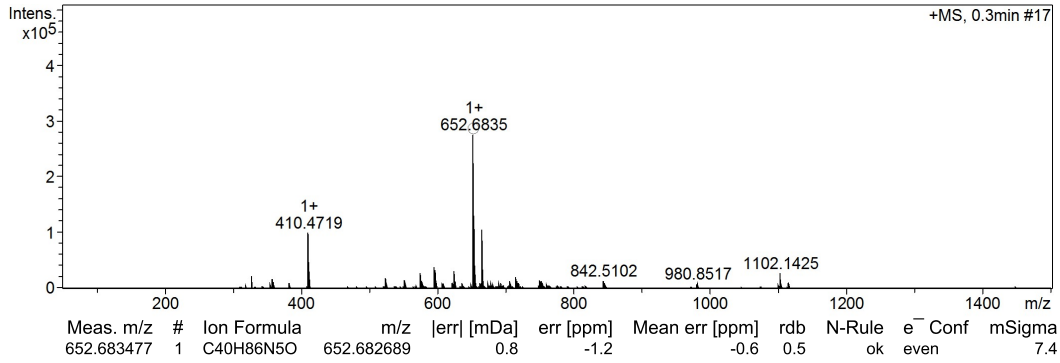**Fig. S91** HRMS Spectrum of lipid **ST9**

BY8060 CT(3)-104 (45.1 mg, CDCl<sub>3</sub>)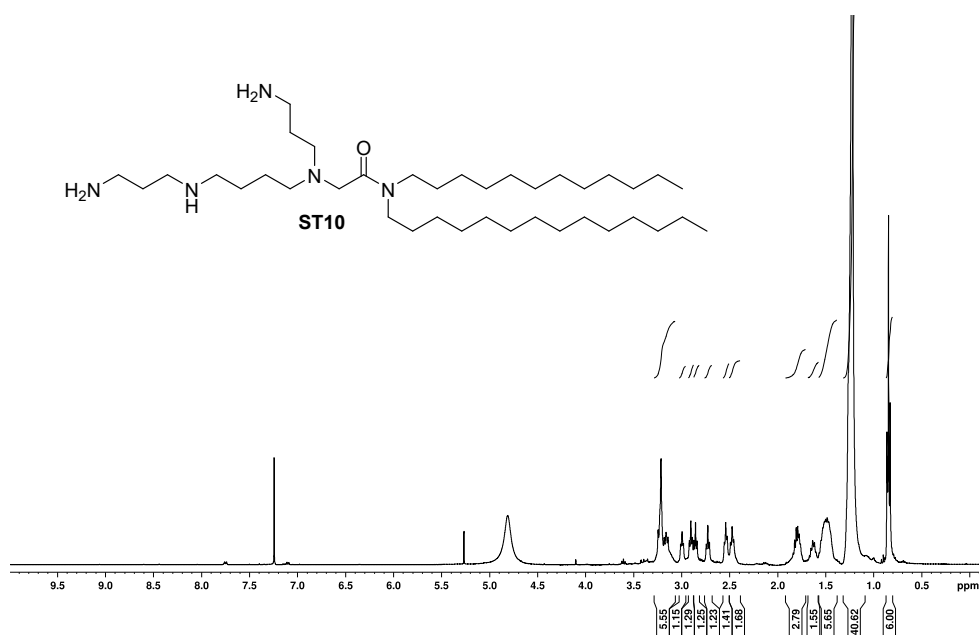Fig. S92 <sup>1</sup>H NMR Spectrum (400 MHz, CDCl<sub>3</sub>) of lipid ST10BY8060 CT(3)-104 (45.1 mg, CDCl<sub>3</sub>)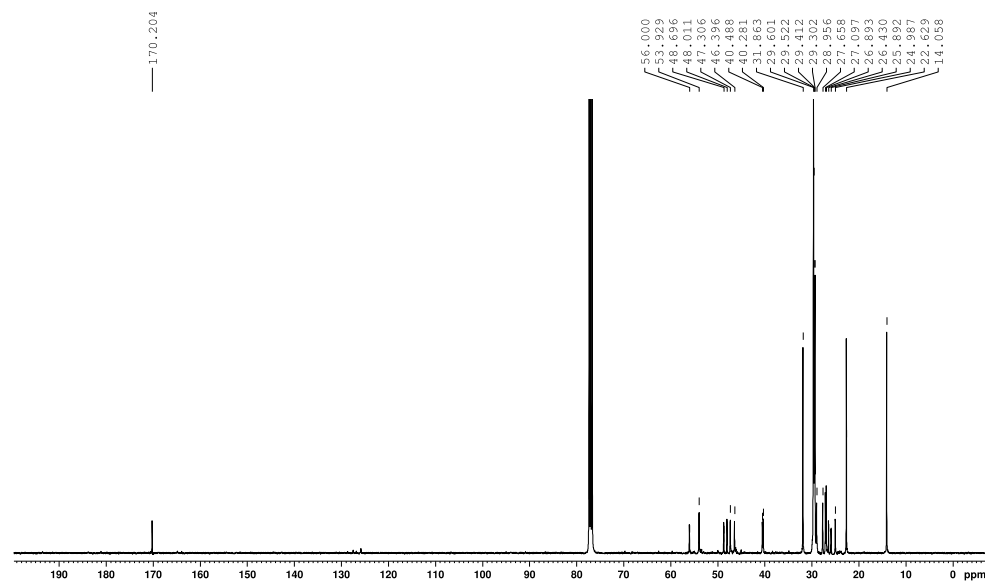Fig. S93 <sup>13</sup>C NMR Spectrum (100 MHz, CDCl<sub>3</sub>) of lipid ST10

---

**Mass Spectrum SmartFormula Report**

---

**Analysis Info**

Analysis Name D:\Data\Boon-ek\ESI\BY-HRMS 1515 (pos).d  
Method tune\_wide-RU.m  
Sample Name CT(3)-104  
Comment

Acquisition Date 12/22/2020 2:59:02 PM  
Operator RU  
Instrument micrOTOF 8213750.10411

**Acquisition Parameter**

|             |            |                      |          |                  |           |
|-------------|------------|----------------------|----------|------------------|-----------|
| Source Type | ESI        | Ion Polarity         | Positive | Set Nebulizer    | 0.3 Bar   |
| Focus       | Not active |                      |          | Set Dry Heater   | 180 °C    |
| Scan Begin  | 50 m/z     | Set Capillary        | 4500 V   | Set Dry Gas      | 4.0 l/min |
| Scan End    | 4000 m/z   | Set End Plate Offset | -500 V   | Set Divert Valve | Waste     |

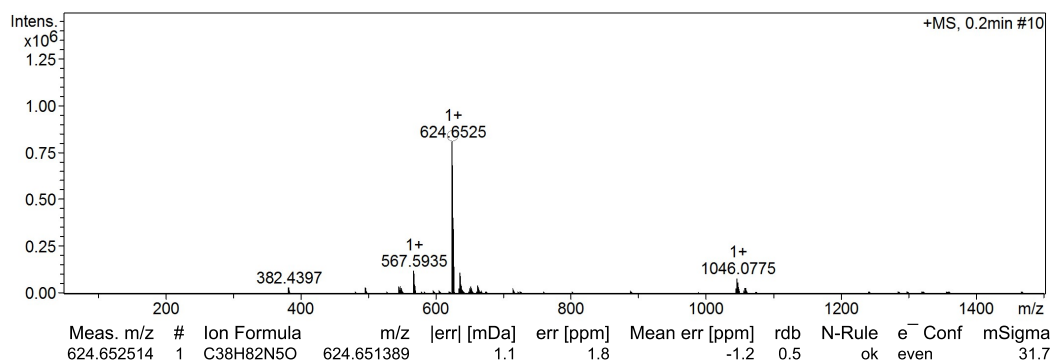**Fig. S94** HRMS Spectrum of lipid **ST10**

BY8061 CT(3)-105 (41.1 mg, CDCl<sub>3</sub>)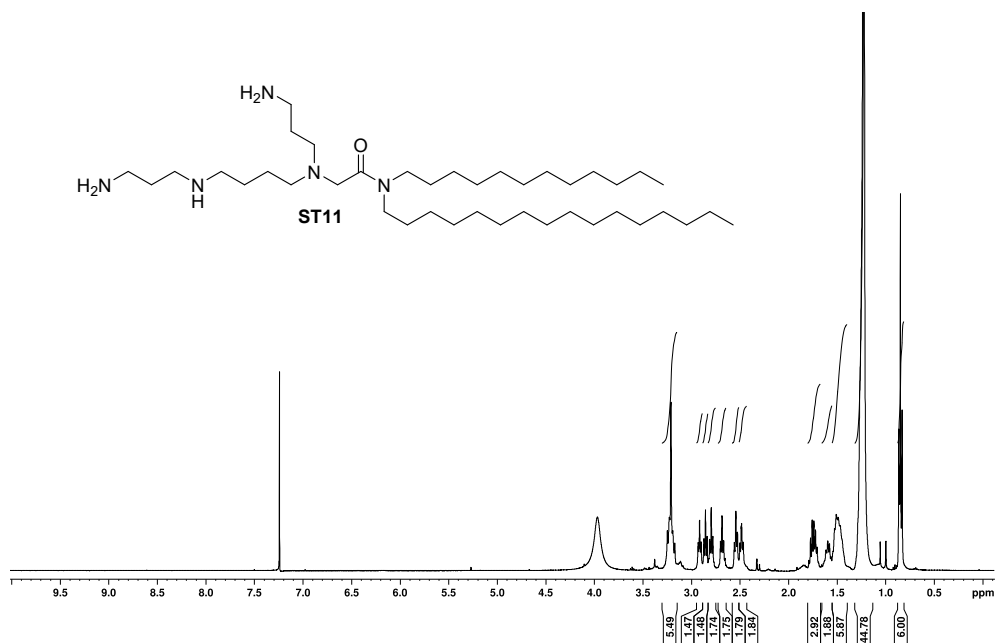**Fig. S95** <sup>1</sup>H NMR Spectrum (400 MHz, CDCl<sub>3</sub>) of lipid ST11BY8061 CT(3)-105 (41.1 mg, CDCl<sub>3</sub>)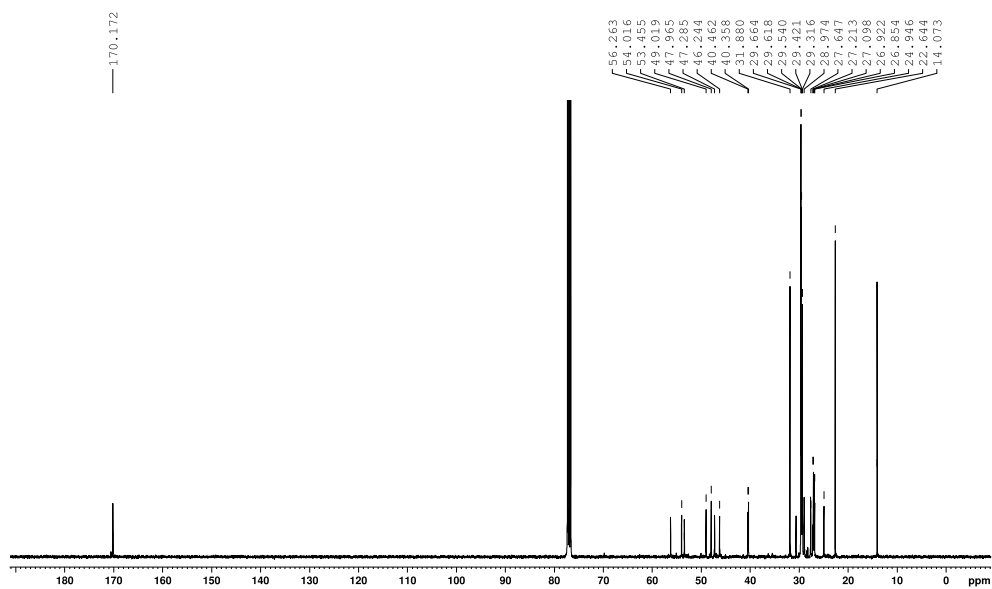**Fig. S96** <sup>13</sup>C NMR Spectrum (100 MHz, CDCl<sub>3</sub>) of lipid ST11

---

**Mass Spectrum SmartFormula Report**


---

**Analysis Info**

Analysis Name D:\Data\Boon-ek\ESI\BY-HRMS 1516 (pos).d  
 Method tune\_wide-RU.m  
 Sample Name CT(3)-105  
 Comment

Acquisition Date 12/22/2020 3:00:12 PM

Operator RU  
 Instrument micrOTOF 8213750.10411

**Acquisition Parameter**

|             |            |                      |          |                  |           |
|-------------|------------|----------------------|----------|------------------|-----------|
| Source Type | ESI        | Ion Polarity         | Positive | Set Nebulizer    | 0.3 Bar   |
| Focus       | Not active |                      |          | Set Dry Heater   | 180 °C    |
| Scan Begin  | 50 m/z     | Set Capillary        | 4500 V   | Set Dry Gas      | 4.0 l/min |
| Scan End    | 4000 m/z   | Set End Plate Offset | -500 V   | Set Divert Valve | Waste     |

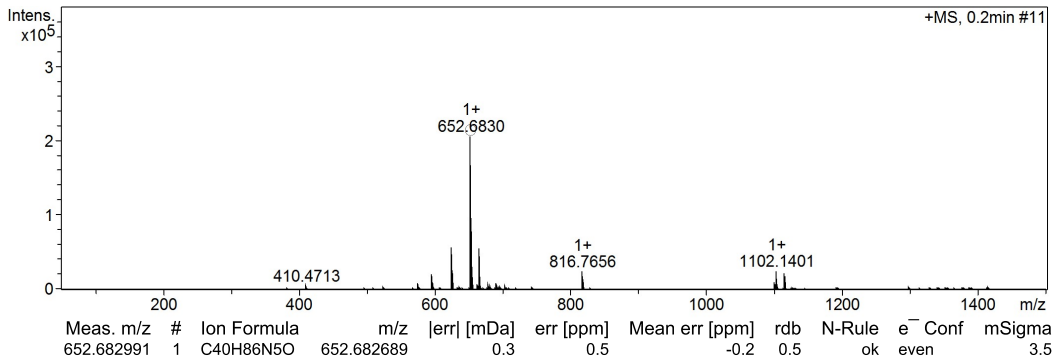**Fig. S97** HRMS Spectrum of lipid **ST11**



BY8062 CT(3)-106 (34.0 mg, CDCl<sub>3</sub>)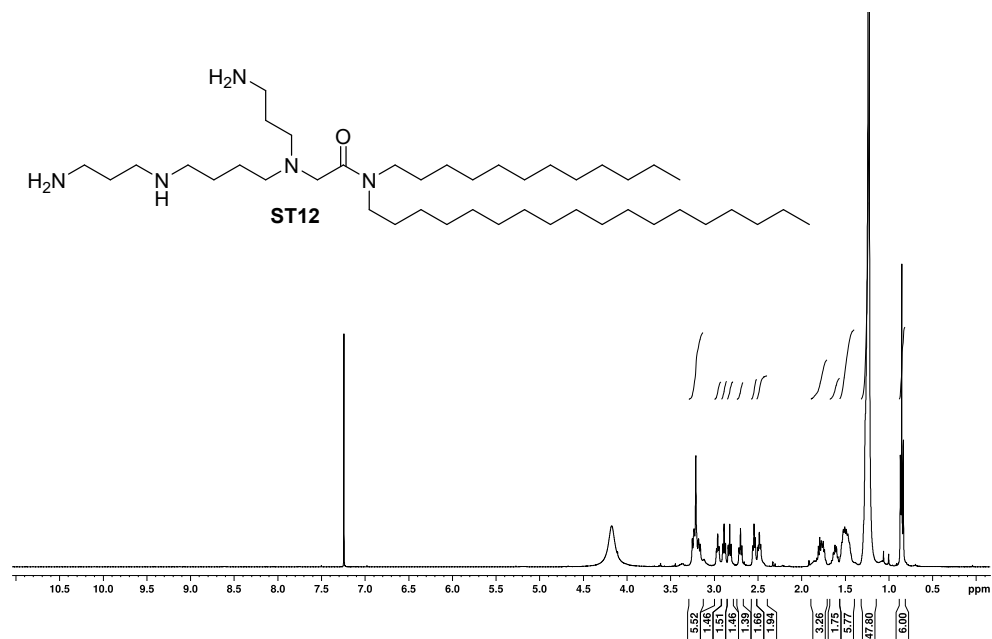**Fig. S98** <sup>1</sup>H NMR Spectrum (400 MHz, CDCl<sub>3</sub>) of lipid ST12BY8062 CT(3)-106 (34.0 mg, CDCl<sub>3</sub>)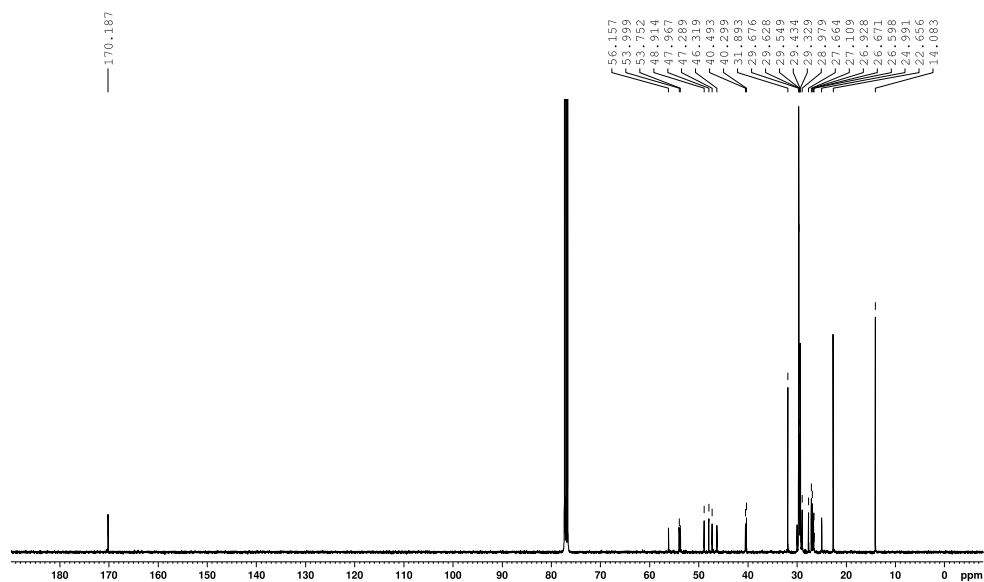**Fig. S99** <sup>13</sup>C NMR Spectrum (100 MHz, CDCl<sub>3</sub>) of lipid ST12

---

## Mass Spectrum SmartFormula Report

---

**Analysis Info**

Analysis Name D:\Data\Boon-ek\ESI\BY-HRMS 1517 (pos).d  
 Method tune\_wide-RU.m  
 Sample Name CT(3)-106  
 Comment

Acquisition Date 12/22/2020 3:01:52 PM

Operator RU  
 Instrument micrOTOF 8213750.10411

**Acquisition Parameter**

|             |            |                      |          |                  |           |
|-------------|------------|----------------------|----------|------------------|-----------|
| Source Type | ESI        | Ion Polarity         | Positive | Set Nebulizer    | 0.3 Bar   |
| Focus       | Not active |                      |          | Set Dry Heater   | 180 °C    |
| Scan Begin  | 50 m/z     | Set Capillary        | 4500 V   | Set Dry Gas      | 4.0 l/min |
| Scan End    | 4000 m/z   | Set End Plate Offset | -500 V   | Set Divert Valve | Waste     |

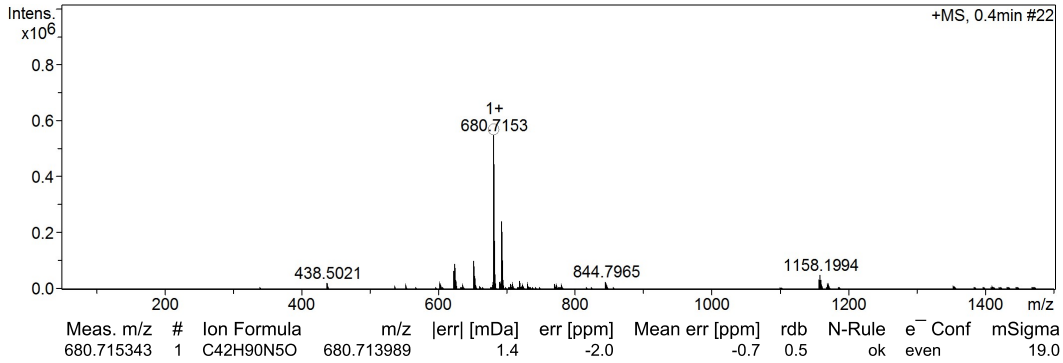**Fig. S100** HRMS Spectrum of lipid **ST12**

BY8063 CT(3)-107 (39.7 mg, CDCl<sub>3</sub>)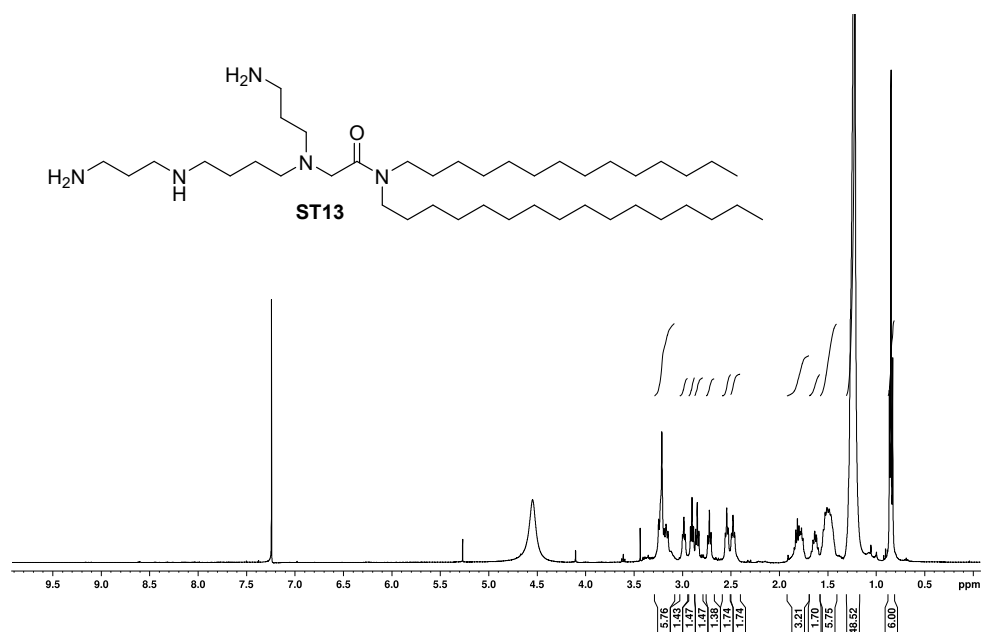Fig. S101 <sup>1</sup>H NMR Spectrum (400 MHz, CDCl<sub>3</sub>) of lipid ST13BY8063 CT(3)-107 (39.7 mg, CDCl<sub>3</sub>)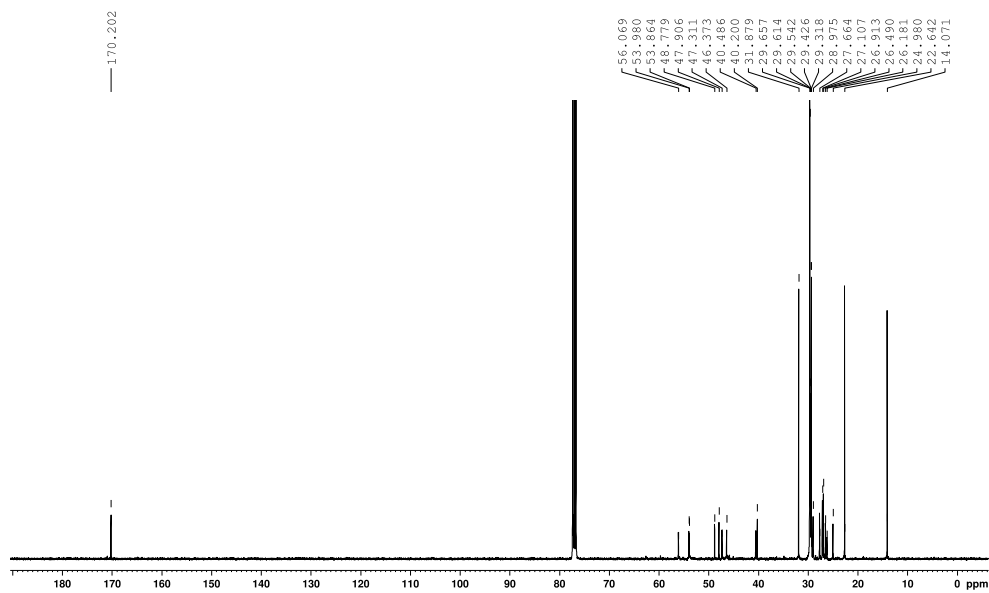Fig. S102 <sup>13</sup>C NMR Spectrum (100 MHz, CDCl<sub>3</sub>) of lipid ST13

---

## Mass Spectrum SmartFormula Report

---

**Analysis Info**

Analysis Name D:\Data\Boon-ek\ESI\BY-HRMS 1518 (pos).d  
 Method tune\_wide-RU.m  
 Sample Name CT(3)-107  
 Comment

Acquisition Date 12/22/2020 3:03:20 PM

Operator RU  
 Instrument micrOTOF 8213750.10411

---

**Acquisition Parameter**

|             |            |                      |          |                  |           |
|-------------|------------|----------------------|----------|------------------|-----------|
| Source Type | ESI        | Ion Polarity         | Positive | Set Nebulizer    | 0.3 Bar   |
| Focus       | Not active |                      |          | Set Dry Heater   | 180 °C    |
| Scan Begin  | 50 m/z     | Set Capillary        | 4500 V   | Set Dry Gas      | 4.0 l/min |
| Scan End    | 4000 m/z   | Set End Plate Offset | -500 V   | Set Divert Valve | Waste     |

---

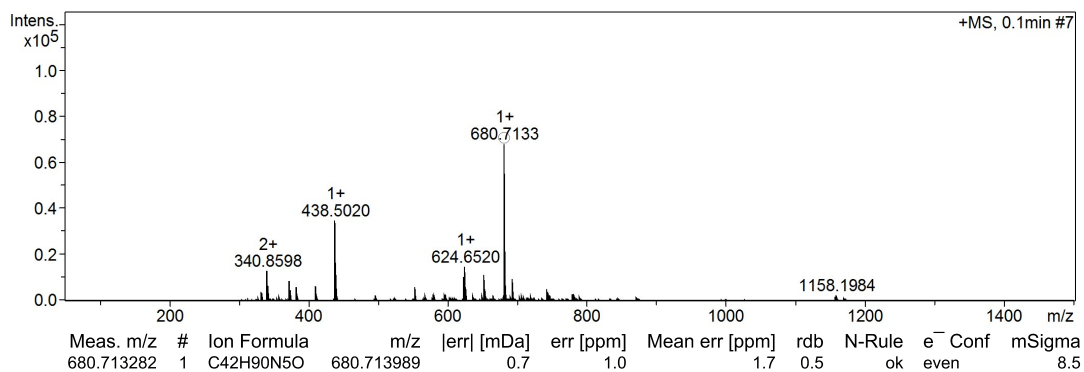**Fig. S103** HRMS Spectrum of lipid **ST13**

BY8064 CT(3)-108 (50.6 mg, CDCl<sub>3</sub>)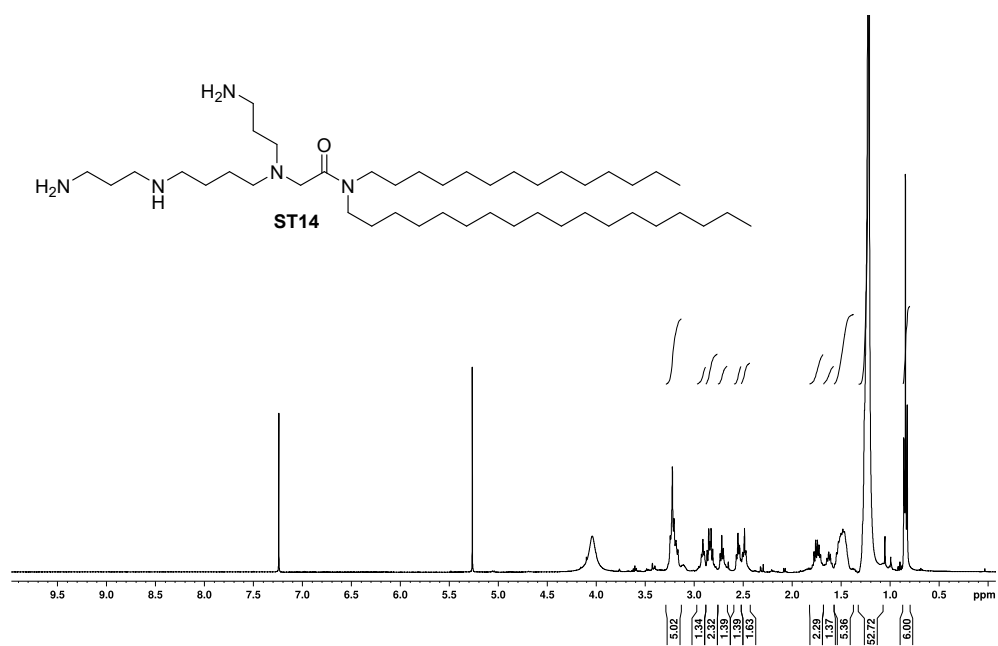Fig. S104 <sup>1</sup>H NMR Spectrum (400 MHz, CDCl<sub>3</sub>) of lipid ST14BY8064 CT(3)-108 (50.6 mg, CDCl<sub>3</sub>)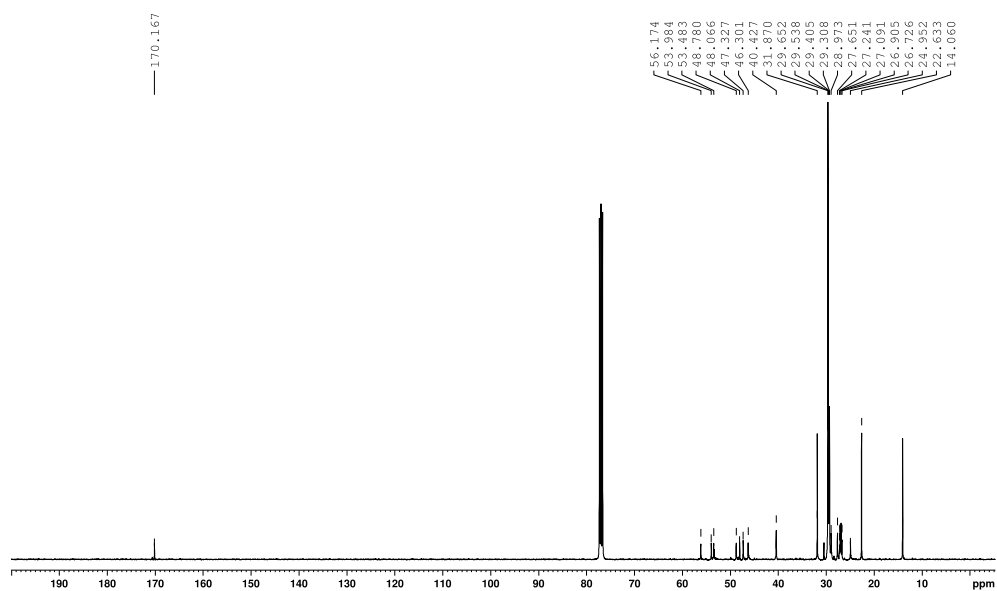Fig. S105 <sup>13</sup>C NMR Spectrum (100 MHz, CDCl<sub>3</sub>) of lipid ST14

---

## Mass Spectrum SmartFormula Report

---

**Analysis Info**

Analysis Name D:\Data\Boon-ek\ESI\BY-HRMS 1519 (pos).d  
 Method tune\_wide-RU.m  
 Sample Name CT(3)-108  
 Comment

Acquisition Date 12/22/2020 3:04:20 PM

Operator RU  
 Instrument micrOTOF 8213750.10411

---

**Acquisition Parameter**

|             |            |                      |          |                  |           |
|-------------|------------|----------------------|----------|------------------|-----------|
| Source Type | ESI        | Ion Polarity         | Positive | Set Nebulizer    | 0.3 Bar   |
| Focus       | Not active |                      |          | Set Dry Heater   | 180 °C    |
| Scan Begin  | 50 m/z     | Set Capillary        | 4500 V   | Set Dry Gas      | 4.0 l/min |
| Scan End    | 4000 m/z   | Set End Plate Offset | -500 V   | Set Divert Valve | Waste     |

---

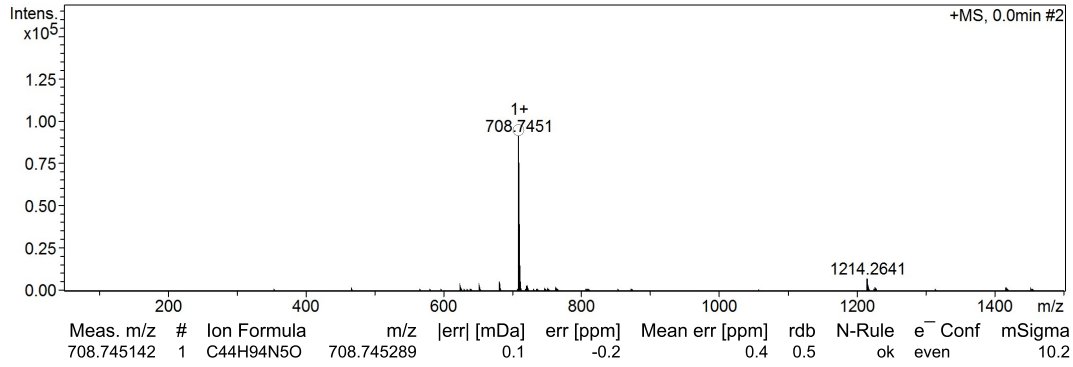

**Fig. S106** HRMS Spectrum of lipid **ST14**

BY8065 CT(3)-109 (40.6 mg, CDCl<sub>3</sub>)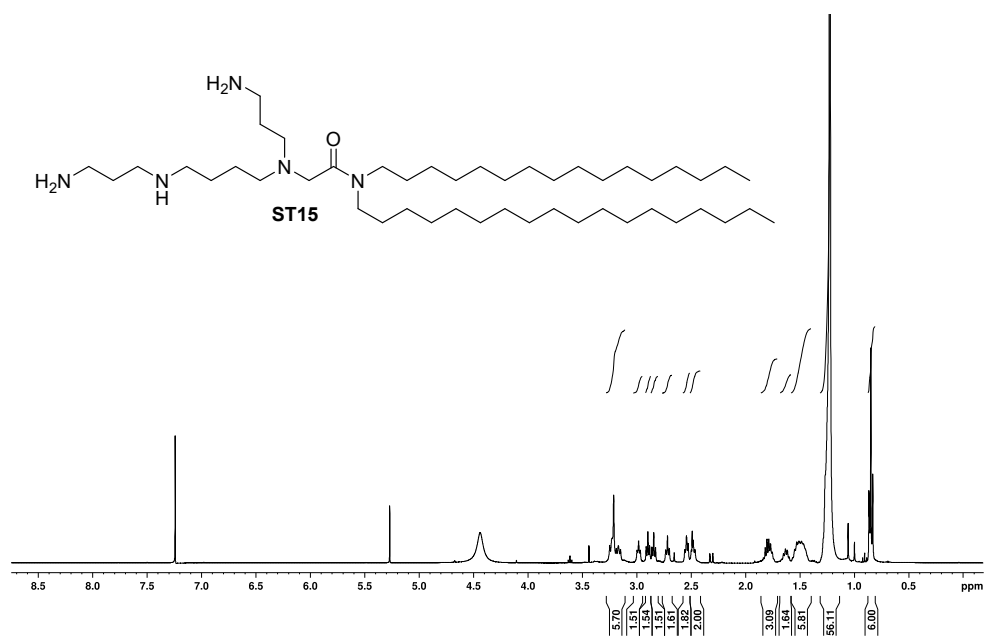**Fig. S107** <sup>1</sup>H NMR Spectrum (400 MHz, CDCl<sub>3</sub>) of lipid ST15BY8065 CT(3)-109 (40.6 mg, CDCl<sub>3</sub>)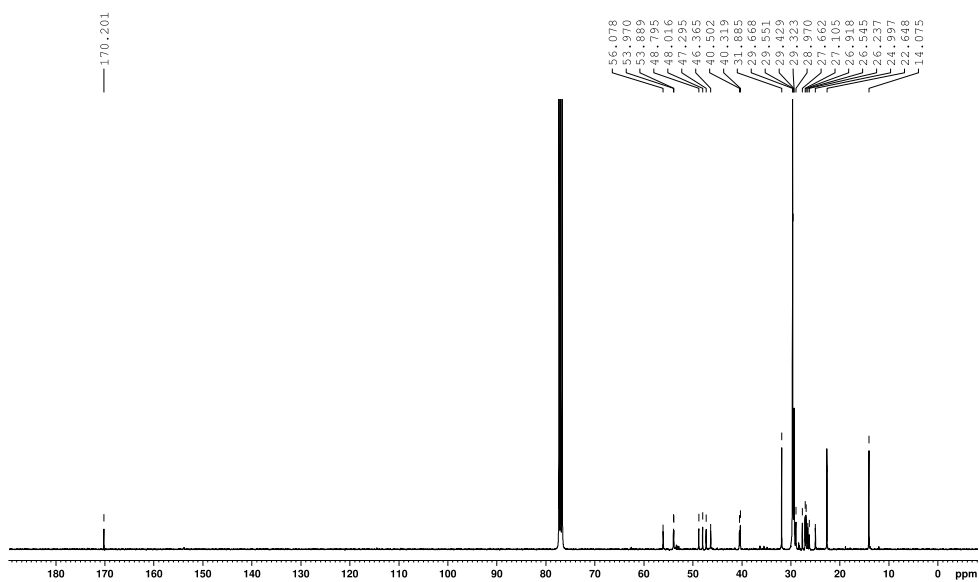**Fig. S108** <sup>13</sup>C NMR Spectrum (100 MHz, CDCl<sub>3</sub>) of lipid ST15

---

## Mass Spectrum SmartFormula Report

---

**Analysis Info**

Analysis Name D:\Data\Boon-ek\ESI\BY-HRMS 1520 (pos).d  
 Method tune\_wide-RU.m  
 Sample Name CT(3)-109  
 Comment

Acquisition Date 12/22/2020 3:05:21 PM

Operator RU  
 Instrument micrOTOF 8213750.10411

**Acquisition Parameter**

|             |            |                      |          |                  |           |
|-------------|------------|----------------------|----------|------------------|-----------|
| Source Type | ESI        | Ion Polarity         | Positive | Set Nebulizer    | 0.3 Bar   |
| Focus       | Not active |                      |          | Set Dry Heater   | 180 °C    |
| Scan Begin  | 50 m/z     | Set Capillary        | 4500 V   | Set Dry Gas      | 4.0 l/min |
| Scan End    | 4000 m/z   | Set End Plate Offset | -500 V   | Set Divert Valve | Waste     |

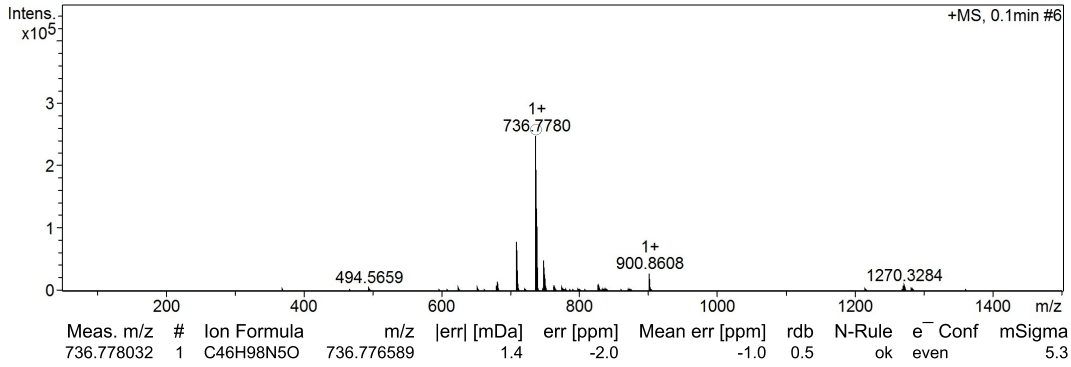**Fig. S109** HRMS Spectrum of lipid **ST15**
